# Supplementary material
Source: publisher figshare collection journal article supplement (https://acs.figshare.com/ndownloader/files/4731943)
Supplement: Supplementary file 1 [file 4731943]

              ########################################
              #                                      #
              #   CIF generated by the Xtal System   #
              #                                      #
              ########################################
 
data_global
 
_audit_creation_method                 Xtal3.6
_audit_creation_date                   06-09-06
_audit_update_record                   ?
 
#==============================================================================
#   (Publishing Staff Use Only)
 
_journal_date_recd_electronic          ?
_journal_date_to_coeditor              ?
_journal_date_from_coeditor            ?
_journal_date_accepted                 ?
_journal_date_printers_first           ?
_journal_date_printers_final           ?
_journal_date_proofs_out               ?
_journal_date_proofs_in                ?
_journal_coeditor_name                 ?
_journal_coeditor_code                 ?
_journal_coeditor_notes
; ?
;
_journal_techeditor_code               ?
_journal_techeditor_notes
; ?
;
_journal_coden_ASTM                    ?
_journal_name_full                     ?
_journal_year                          ?
_journal_volume                        ?
_journal_issue                         ?
_journal_page_first                    ?
_journal_page_last                     ?
_journal_suppl_publ_number             ?
_journal_suppl_publ_pages              ?
 
#=======================================================================
 
# 1. SUBMISSION DETAILS
#----------------------
 
_publ_contact_author_name
     'Skelton, B. W.'
_publ_contact_author_address
;
   Department of Chemistry
   University of Western Australia
   35 Stirling Highway
   Crawley
   Western Australia 6009
   Australia
;
_publ_contact_author_email            bws@crystal.uwa.edu.au
_publ_contact_author_fax               (+61)_08_6488_1118
_publ_contact_author_phone             (+61)_08_6488_7107
 

 
loop_
_publ_author_name
_publ_author_footnote
_publ_author_address
 
 
'Skelton, Brian W.' .
; Department of Chemistry,
University of Western Australia,
35 Stirling Highway,
Crawley,
WA 6009,
Australia.
;
 

 
_publ_section_references
;
 Sheldrick, G M. (1996). SADABS. Program for Empirical Absorption Correction
  of Area Detector Data.  University of Gottingen, Germany.
 
 Siemens (1995). SMART and SAINT. Area-Detector Control and Integration
 Software. Siemens Analytical X-ray Systems Inc., Madison, Wisconsin, USA.
 
 Hall, S.R., King, G.S.D., and Stewart., J.M. (1995).
 The Xtal 3.5 User's Manual.  University of Western Australia, Lamb: Perth.
;

 
 
#=======================================================================
#  Data block for single structure (one for each study in the paper)
#=======================================================================
 
 
data_cpirgn
 
 
# 2. EXPERIMENTAL DATA
#---------------------
 
 
_chemical_formula_sum                 'C17 H25 Cl2 Ir N4 O'
_chemical_formula_moiety        'C17 H23 Cl Ir1 N4, Cl, H2 O'
_chemical_formula_weight               564.54
_chemical_melting_point                ?
 
_symmetry_cell_setting                 triclinic
_symmetry_space_group_name_H-M         P_-1
_symmetry_space_group_name_Hall        -p_1
 
loop_
_symmetry_equiv_pos_as_xyz
  +x,+y,+z  -x,-y,-z
 
_cell_length_a                         7.542(3)
_cell_length_b                         8.536(3)
_cell_length_c                         15.912(6)
_cell_angle_alpha                      102.563(6)
_cell_angle_beta                       99.460(6)
_cell_angle_gamma                      97.057(6)
_cell_volume                           972.8(6)
_cell_formula_units_Z                  2
 
_exptl_crystal_density_diffrn          1.927
_exptl_crystal_density_meas            ?
_exptl_crystal_density_method          'not measured'
_diffrn_radiation_type                'Mo K\a'
_diffrn_radiation_wavelength           .71073
 
_cell_measurement_reflns_used          3638
_cell_measurement_theta_min            2.48
_cell_measurement_theta_max            28.02
_cell_measurement_temperature          150(2)
 
_exptl_absorpt_coefficient_mu          7.15
_exptl_crystal_description             prism
_exptl_crystal_size_max                .07
_exptl_crystal_size_mid                .05
_exptl_crystal_size_min                .03
_exptl_crystal_size_rad                ?
_exptl_crystal_colour                  pale_yellow
 
_diffrn_measurement_device_type        
;
Bruker SMART CCD diffractometer
;
_diffrn_measurement_method             '\w scans'
_diffrn_detector_area_resol_mean       ?
 
_exptl_absorpt_correction_type         multi-scan
_exptl_absorpt_process_details
;
 SADABS; Sheldrick, 1996
;
_exptl_absorpt_correction_T_min        .57
_exptl_absorpt_correction_T_max        1
 
_diffrn_reflns_number                  8815
_reflns_number_total                   4298
_reflns_Friedel_coverage               ?
_reflns_number_gt                      3606
_reflns_threshold_expression          'F    >  4.00 sig(F   )'
 
_diffrn_reflns_theta_max               27.51
_diffrn_reflns_theta_full              27.51
_diffrn_measured_fraction_theta_max    1
_diffrn_measured_fraction_theta_full   1
_diffrn_reflns_av_R_equivalents        .052
_diffrn_reflns_limit_h_min             -9
_diffrn_reflns_limit_h_max             9
_diffrn_reflns_limit_k_min             -11
_diffrn_reflns_limit_k_max             10
_diffrn_reflns_limit_l_min             -20
_diffrn_reflns_limit_l_max             20
_diffrn_standards_number               0
_diffrn_standards_decay_%              0
 
 
_refine_ls_structure_factor_coef       Fsqd
_refine_ls_R_factor_gt                 .039
_refine_ls_wR_factor_ref               .121
_refine_ls_goodness_of_fit_ref         1.138
_refine_ls_number_reflns               4298
_refine_ls_number_parameters           227
_refine_ls_weighting_scheme            calc
_refine_ls_weighting_details           
;
w=1/(sig^2(F^2) + 33F^2)
;
_refine_ls_hydrogen_treatment          noref
_refine_ls_shift/su_max                .031
_refine_diff_density_min               -2.134
_refine_diff_density_max               3.07
 
_refine_ls_extinction_method           none  
_refine_ls_extinction_coef             ?       

 
 
# 3. Information for the "methods" section
#-----------------------------------------
 
_computing_data_collection             'Siemens SMART (Siemens, 1995)'
_computing_cell_refinement             'Siemens SAINT (Siemens, 1995)'
_computing_data_reduction              xtal
_computing_structure_solution          xtal
_computing_structure_refinement        xtal
_computing_molecular_graphics          xtal
_computing_publication_material       'xtal BONDLA CIFIO'
 
 
# 4. Supplementary data for validation and tables
#------------------------------------------------
 
loop_
_atom_type_symbol
_atom_type_description
_atom_type_oxidation_number
_atom_type_number_in_cell
_atom_type_scat_dispersion_real
_atom_type_scat_dispersion_imag
_atom_type_scat_source
  C  ?  0  34  .002014  .002014  'Int Tables Vol IV Tables 2.2B and 2.3.1'
  H  ?  0  50  0  0  'Int Tables Vol IV Tables 2.2B and 2.3.1'
  Cl  ?  0  4  .132019  .158997  'Int Tables Vol IV Tables 2.2B and 2.3.1'
  Ir  ?  0  2   -2.066   7.99  'Int Tables Vol IV Tables 2.2B and 2.3.1'
  N  ?  0  8  .004028  .002991  'Int Tables Vol IV Tables 2.2B and 2.3.1'
  O  ?  0  2  .007996  .005981  'Int Tables Vol IV Tables 2.2B and 2.3.1'
 
loop_
_atom_site_label
_atom_site_fract_x
_atom_site_fract_y
_atom_site_fract_z
_atom_site_U_iso_or_equiv
_atom_site_adp_type
_atom_site_calc_flag
_atom_site_calc_attached_atom
_atom_site_occupancy
_atom_site_disorder_assembly
_atom_site_disorder_group
  Ir  .67054(4)  .70963(4)  .20550(2)  .01692(14)  Uani  ?  ?  1.00000  ?  ?
  Cl1  .4360(3)  .7279(3)  .08954(14)  .0295(9)  Uani  ?  ?  1.00000  ?  ?
  N11  .4581(10)  .7165(9)  .3515(4)  .020(3)  Uani  ?  ?  1.00000  ?  ?
  N12  .5007(9)  .7905(9)  .2879(4)  .020(3)  Uani  ?  ?  1.00000  ?  ?
  C13  .4482(12)  .9354(11)  .3072(6)  .027(4)  Uani  ?  ?  1.00000  ?  ?
  C14  .3746(13)  .9550(11)  .3826(6)  .028(3)  Uani  ?  ?  1.00000  ?  ?
  C15  .3807(13)  .8118(12)  .4083(6)  .028(3)  Uani  ?  ?  1.00000  ?  ?
  N21  .4597(10)  .4519(8)  .2695(5)  .019(3)  Uani  ?  ?  1.00000  ?  ?
  N22  .5258(9)  .4839(9)  .2002(5)  .021(3)  Uani  ?  ?  1.00000  ?  ?
  C23  .4704(13)  .3512(12)  .1348(5)  .027(3)  Uani  ?  ?  1.00000  ?  ?
  C24  .3689(14)  .2326(12)  .1625(6)  .032(4)  Uani  ?  ?  1.00000  ?  ?
  C25  .3635(11)  .2998(10)  .2492(5)  .021(3)  Uani  ?  ?  1.00000  ?  ?
  C0  .5132(11)  .5644(10)  .3541(5)  .019(3)  Uani  ?  ?  1.00000  ?  ?
  C101  .9365(10)  .6797(11)  .2659(5)  .019(3)  Uani  ?  ?  1.00000  ?  ?
  C1011  .9770(11)  .5587(10)  .3199(6)  .023(3)  Uani  ?  ?  1.00000  ?  ?
  C102  .9225(10)  .6497(11)  .1736(5)  .019(3)  Uani  ?  ?  1.00000  ?  ?
  C1021  .9525(14)  .4951(13)  .1153(6)  .031(4)  Uani  ?  ?  1.00000  ?  ?
  C103  .8950(10)  .7930(10)  .1478(5)  .017(3)  Uani  ?  ?  1.00000  ?  ?
  C1031  .8774(14)  .8151(15)  .0568(6)  .036(4)  Uani  ?  ?  1.00000  ?  ?
  C104  .8748(11)  .9122(9)  .2223(5)  .020(3)  Uani  ?  ?  1.00000  ?  ?
  C1041  .8570(13)  1.0867(10)  .2272(7)  .031(4)  Uani  ?  ?  1.00000  ?  ?
  C105  .9119(10)  .8417(9)  .2972(5)  .015(3)  Uani  ?  ?  1.00000  ?  ?
  C1051  .9132(15)  .9251(13)  .3909(6)  .038(4)  Uani  ?  ?  1.00000  ?  ?
  Cl2  .2122(3)  .3294(3)  .44803(13)  .0238(8)  Uani  ?  ?  1.00000  ?  ?
  O1  .2192(9)  .6845(8)  .5628(4)  .030(3)  Uani  ?  ?  1.00000  ?  ?
  H13  .45708  1.01762  .27426  .02900  Uiso  ?  ?  1.00000  ?  ?
  H14  .32706  1.04666  .41094  .03700  Uiso  ?  ?  1.00000  ?  ?
  H15  .34044  .78717  .45877  .03300  Uiso  ?  ?  1.00000  ?  ?
  H23  .49052  .33861  .07678  .03200  Uiso  ?  ?  1.00000  ?  ?
  H24  .31510  .12531  .12916  .03800  Uiso  ?  ?  1.00000  ?  ?
  H25  .30628  .24694  .28703  .02600  Uiso  ?  ?  1.00000  ?  ?
  H0a  .45747  .51982  .39637  .02400  Uiso  ?  ?  1.00000  ?  ?
  H0b  .64256  .57934  .37375  .02400  Uiso  ?  ?  1.00000  ?  ?
  H1011a  1.09505  .53148  .31514  .03200  Uiso  ?  ?  1.00000  ?  ?
  H1011b  .88921  .46197  .29959  .03200  Uiso  ?  ?  1.00000  ?  ?
  H1011c  .97702  .60433  .38009  .03200  Uiso  ?  ?  1.00000  ?  ?
  H1021a  .88810  .47687  .05692  .04800  Uiso  ?  ?  1.00000  ?  ?
  H1021b  .91961  .40329  .13807  .04800  Uiso  ?  ?  1.00000  ?  ?
  H1021c  1.08012  .50069  .11478  .04800  Uiso  ?  ?  1.00000  ?  ?
  H1031c  .81617  .90446  .05246  .05300  Uiso  ?  ?  1.00000  ?  ?
  H1031b  .81428  .71998  .01657  .05300  Uiso  ?  ?  1.00000  ?  ?
  H1031a  .99895  .83839  .04469  .05300  Uiso  ?  ?  1.00000  ?  ?
  H1041a  .79400  1.12630  .27225  .04500  Uiso  ?  ?  1.00000  ?  ?
  H1041b  .78835  1.09726  .17209  .04500  Uiso  ?  ?  1.00000  ?  ?
  H1041c  .97359  1.15181  .23768  .04500  Uiso  ?  ?  1.00000  ?  ?
  H1051a  .90748  .85163  .42770  .04500  Uiso  ?  ?  1.00000  ?  ?
  H1051b  .80477  .97873  .39309  .04500  Uiso  ?  ?  1.00000  ?  ?
  H1051c  1.01571  1.00532  .41420  .04500  Uiso  ?  ?  1.00000  ?  ?
  H1a  .10197  .67496  .57357  .04700  Uiso  ?  ?  1.00000  ?  ?
  H1b  .22752  .58221  .53192  .03500  Uiso  ?  ?  1.00000  ?  ?
 
loop_
_atom_site_aniso_label
_atom_site_aniso_U_11
_atom_site_aniso_U_22
_atom_site_aniso_U_33
_atom_site_aniso_U_12
_atom_site_aniso_U_13
_atom_site_aniso_U_23
  Ir  .01575(17)  .02021(18)  .01415(17)  .00093(12)  .00137(11)  .00508(12)
  Cl1  .0238(10)  .0420(13)  .0239(10)  .0040(9)  -.0007(8)  .0153(9)
  N11  .022(3)  .020(3)  .017(3)  .002(3)  -.001(3)  .007(3)
  N12  .013(3)  .029(4)  .018(3)  .006(3)  .004(2)  .005(3)
  C13  .026(4)  .022(4)  .038(5)  .008(3)  .011(4)  .013(4)
  C14  .027(4)  .019(4)  .034(5)  -.006(3)  .015(4)  -.006(3)
  C15  .031(5)  .032(5)  .019(4)  .004(4)  .006(3)  .003(3)
  N21  .023(3)  .013(3)  .021(3)  .004(3)  .002(3)  .003(2)
  N22  .014(3)  .029(4)  .022(3)  .006(3)  .003(3)  .006(3)
  C23  .032(5)  .033(5)  .014(4)  .002(4)  -.005(3)  .008(3)
  C24  .043(6)  .025(5)  .023(4)  .008(4)  -.002(4)  -.002(3)
  C25  .018(4)  .025(4)  .018(4)  .002(3)  .000(3)  .005(3)
  C0  .020(4)  .021(4)  .016(3)  .000(3)  .008(3)  .005(3)
  C101  .006(3)  .030(4)  .022(4)  .003(3)  -.005(3)  .011(3)
  C1011  .020(4)  .021(4)  .026(4)  .006(3)  -.002(3)  .004(3)
  C102  .007(3)  .029(4)  .021(4)  .005(3)  .006(3)  -.001(3)
  C1021  .033(5)  .040(5)  .022(4)  .010(4)  .008(4)  .006(4)
  C103  .009(3)  .029(4)  .014(3)  -.003(3)  -.002(2)  .013(3)
  C1031  .035(5)  .059(7)  .017(4)  .009(5)  .007(4)  .017(4)
  C104  .017(4)  .012(4)  .026(4)  -.007(3)  -.003(3)  .006(3)
  C1041  .034(5)  .007(3)  .050(6)  .002(3)  -.001(4)  .010(4)
  C105  .016(3)  .020(4)  .016(3)  .003(3)  .009(3)  .010(3)
  C1051  .045(6)  .043(6)  .014(4)  -.025(5)  .002(4)  .002(4)
  Cl2  .0238(9)  .0273(10)  .0215(9)  .0057(8)  .0037(7)  .0080(8)
  O1  .027(3)  .032(4)  .035(4)  .002(3)  .016(3)  .010(3)
 
 
# 5. Molecular Geometry
#----------------------
 
loop_
_geom_bond_atom_site_label_1
_geom_bond_atom_site_label_2
_geom_bond_site_symmetry_1
_geom_bond_site_symmetry_2
_geom_bond_distance
_geom_bond_publ_flag                 
  Ir  Cl1  .  .  2.383(2)  ?
  Ir  N12  .  .  2.053(7)  ?
  Ir  N22  .  .  2.073(7)  ?
  Ir  C101  .  .  2.147(8)  ?
  Ir  C102  .  .  2.139(8)  ?
  Ir  C103  .  .  2.172(8)  ?
  Ir  C104  .  .  2.108(8)  ?
  Ir  C105  .  .  2.150(7)  ?
  N11  N12  .  .  1.363(11)  ?
  N11  C15  .  .  1.338(12)  ?
  N11  C0  .  .  1.419(12)  ?
  N12  C13  .  .  1.333(12)  ?
  C13  C14  .  .  1.389(15)  ?
  C13  H13  .  .  .965  ?
  C14  C15  .  .  1.374(15)  ?
  C14  H14  .  .  .955  ?
  C15  H15  .  .  .959  ?
  N21  N22  .  .  1.347(11)  ?
  N21  C25  .  .  1.351(10)  ?
  N21  C0  .  .  1.436(9)  ?
  N22  C23  .  .  1.330(10)  ?
  C23  C24  .  .  1.384(15)  ?
  C23  H23  .  .  .946  ?
  C24  C25  .  .  1.384(12)  ?
  C24  H24  .  .  .955  ?
  C25  H25  .  .  .953  ?
  C0  H0a  .  .  .968  ?
  C0  H0b  .  .  .957)  ?
  C101  C1011  .  .  1.508(14)  ?
  C101  C102  .  .  1.419(12)  ?
  C101  C105  .  .  1.411(12)  ?
  C1011  H1011a  .  .  .958  ?
  C1011  H1011b  .  .  .951  ?
  C1011  H1011c  .  .  .952  ?
  C102  C1021  .  .  1.505(13)  ?
  C102  C103  .  .  1.400(13)  ?
  C1021  H1021a  .  .  .945  ?
  C1021  H1021b  .  .  .955  ?
  C1021  H1021c  .  .  .959  ?
  C103  C1031  .  .  1.487(13)  ?
  C103  C104  .  .  1.428(11)  ?
  C1031  H1031c  .  .  .949 ?
  C1031  H1031b  .  .  .935 ?
  C1031  H1031a  .  .  .973  ?
  C104  C1041  .  .  1.498(12)  ?
  C104  C105  .  .  1.451(12)  ?
  C1041  H1041a  .  .  .948  ?
  C1041  H1041b  .  .  .971  ?
  C1041  H1041c  .  .  .950  ?
  C105  C1051  .  .  1.503(11)  ?
  C1051  H1051a  .  .  .948  ?
  C1051  H1051b  .  .  .987  ?
  C1051  H1051c  .  .  .933  ?
  O1  H1a  .  .  .925  ?
  O1  H1b  .  .  .919  ?
 
loop_
_geom_angle_atom_site_label_1
_geom_angle_atom_site_label_2
_geom_angle_atom_site_label_3
_geom_angle_site_symmetry_1
_geom_angle_site_symmetry_2
_geom_angle_site_symmetry_3
_geom_angle
_geom_angle_publ_flag               
  Cl1  Ir  N12  .  .  .  85.9(2)  ?
  Cl1  Ir  N22  .  .  .  87.0(2)  ?
  Cl1  Ir  C101  .  .  .  156.8(2)  ?
  Cl1  Ir  C102  .  .  .  118.2(2)  ?
  Cl1  Ir  C103  .  .  .  95.6(2)  ?
  Cl1  Ir  C104  .  .  .  105.8(2)  ?
  Cl1  Ir  C105  .  .  .  144.1(2)  ?
  N12  Ir  N22  .  .  .  82.9(3)  ?
  N12  Ir  C101  .  .  .  116.9(3)  ?
  N12  Ir  C102  .  .  .  155.3(3)  ?
  N12  Ir  C103  .  .  .  142.5(3)  ?
  N12  Ir  C104  .  .  .  104.7(3)  ?
  N12  Ir  C105  .  .  .  93.1(3)  ?
  N22  Ir  C101  .  .  .  99.5(3)  ?
  N22  Ir  C102  .  .  .  102.4(3)  ?
  N22  Ir  C103  .  .  .  134.6(3)  ?
  N22  Ir  C104  .  .  .  165.4(3)  ?
  N22  Ir  C105  .  .  .  128.6(3)  ?
  C101  Ir  C102  .  .  .  38.7(3)  ?
  C101  Ir  C103  .  .  .  64.0(3)  ?
  C101  Ir  C104  .  .  .  65.9(3)  ?
  C101  Ir  C105  .  .  .  38.3(3)  ?
  C102  Ir  C103  .  .  .  37.9(3)  ?
  C102  Ir  C104  .  .  .  65.5(3)  ?
  C102  Ir  C105  .  .  .  64.6(3)  ?
  C103  Ir  C104  .  .  .  38.9(3)  ?
  C103  Ir  C105  .  .  .  64.4(3)  ?
  C104  Ir  C105  .  .  .  39.8(3)  ?
  N12  N11  C15  .  .  .  111.4(8)  ?
  N12  N11  C0  .  .  .  118.9(7)  ?
  C15  N11  C0  .  .  .  129.4(8)  ?
  Ir  N12  N11  .  .  .  123.4(6)  ?
  Ir  N12  C13  .  .  .  129.5(7)  ?
  N11  N12  C13  .  .  .  105.1(7)  ?
  N12  C13  C14  .  .  .  110.8(9)  ?
  N12  C13  H13  .  .  .  126.3  ?
  C14  C13  H13  .  .  .  122.8  ?
  C13  C14  C15  .  .  .  105.4(8)  ?
  C13  C14  H14  .  .  .  128.3  ?
  C15  C14  H14  .  .  .  126.2  ?
  N11  C15  C14  .  .  .  107.2(9)  ?
  N11  C15  H15  .  .  .  126.8  ?
  C14  C15  H15  .  .  .  126.0  ?
  N22  N21  C25  .  .  .  111.1(6)  ?
  N22  N21  C0  .  .  .  120.4(6)  ?
  C25  N21  C0  .  .  .  128.0(8)  ?
  Ir  N22  N21  .  .  .  121.8(5)  ?
  Ir  N22  C23  .  .  .  131.5(7)  ?
  N21  N22  C23  .  .  .  106.6(7)  ?
  N22  C23  C24  .  .  .  110.0(8)  ?
  N22  C23  H23  .  .  .  126.3  ?
  C24  C23  H23  .  .  .  123.6  ?
  C23  C24  C25  .  .  .  106.1(7)  ?
  C23  C24  H24  .  .  .  127.4  ?
  C25  C24  H24  .  .  .  126.5  ?
  N21  C25  C24  .  .  .  106.2(8)  ?
  N21  C25  H25  .  .  .  127.5  ?
  C24  C25  H25  .  .  .  126.3  ?
  N11  C0  N21  .  .  .  111.0(7)  ?
  N11  C0  H0a  .  .  .  109.1  ?
  N11  C0  H0b  .  .  .  109.8  ?
  N21  C0  H0a  .  .  .  109.2  ?
  N21  C0  H0b  .  .  .  110.3  ?
  H0a  C0  H0b  .  .  .  107.3  ?
  Ir  C101  C1011  .  .  .  125.9(5)  ?
  Ir  C101  C102  .  .  .  70.4(4)  ?
  Ir  C101  C105  .  .  .  70.9(4)  ?
  C1011  C101  C102  .  .  .  125.0(8)  ?
  C1011  C101  C105  .  .  .  126.9(7)  ?
  C102  C101  C105  .  .  .  108.1(8)  ?
  C101  C1011  H1011a  .  .  .  109.1  ?
  C101  C1011  H1011b  .  .  .  110.9  ?
  C101  C1011  H1011c  .  .  .  110.4  ?
  H1011a  C1011  H1011b  .  .  .  108.7  ?
  H1011a  C1011  H1011c  .  .  .  108.6  ?
  H1011b  C1011  H1011c  .  .  .  109.1  ?
  Ir  C102  C101  .  .  .  71.0(5)  ?
  Ir  C102  C1021  .  .  .  127.5(5)  ?
  Ir  C102  C103  .  .  .  72.3(5)  ?
  C101  C102  C1021  .  .  .  125.2(9)  ?
  C101  C102  C103  .  .  .  108.6(7)  ?
  C1021  C102  C103  .  .  .  125.9(8)  ?
  C102  C1021  H1021a  .  .  .  112.5  ?
  C102  C1021  H1021b  .  .  .  111.1  ?
  C102  C1021  H1021c  .  .  .  109.0  ?
  H1021a  C1021  H1021b  .  .  .  109.5  ?
  H1021a  C1021  H1021c  .  .  .  108.7  ?
  H1021b  C1021  H1021c  .  .  .  105.7  ?
  Ir  C103  C102  .  .  .  69.8(5)  ?
  Ir  C103  C1031  .  .  .  125.1(6)  ?
  Ir  C103  C104  .  .  .  68.1(5)  ?
  C102  C103  C1031  .  .  .  125.9(8)  ?
  C102  C103  C104  .  .  .  108.8(7)  ?
  C1031  C103  C104  .  .  .  125.2(9)  ?
  C103  C1031  H1031c  .  .  .  109.0  ?
  C103  C1031  H1031b  .  .  .  110.1  ?
  C103  C1031  H1031a  .  .  .  108.6  ?
  H1031c  C1031  H1031b  .  .  .  110.9  ?
  H1031c  C1031  H1031a  .  .  .  109.1  ?
  H1031b  C1031  H1031a  .  .  .  109.0  ?
  Ir  C104  C103  .  .  .  72.9(4)  ?
  Ir  C104  C1041  .  .  .  129.4(6)  ?
  Ir  C104  C105  .  .  .  71.6(4)  ?
  C103  C104  C1041  .  .  .  127.4(9)  ?
  C103  C104  C105  .  .  .  106.2(7)  ?
  C1041  C104  C105  .  .  .  125.3(7)  ?
  C104  C1041  H1041a  .  .  .  110.6  ?
  C104  C1041  H1041b  .  .  .  110.2  ?
  C104  C1041  H1041c  .  .  .  110.6  ?
  H1041a  C1041  H1041b  .  .  .  107.9  ?
  H1041a  C1041  H1041c  .  .  .  109.7  ?
  H1041b  C1041  H1041c  .  .  .  107.8  ?
  Ir  C105  C101  .  .  .  70.7(4)  ?
  Ir  C105  C104  .  .  .  68.6(4)  ?
  Ir  C105  C1051  .  .  .  123.7(6)  ?
  C101  C105  C104  .  .  .  107.9(7)  ?
  C101  C105  C1051  .  .  .  126.4(8)  ?
  C104  C105  C1051  .  .  .  125.5(8)  ?
  C105  C1051  H1051a  .  .  .  112.8  ?
  C105  C1051  H1051b  .  .  .  109.2  ?
  C105  C1051  H1051c  .  .  .  111.3  ?
  H1051a  C1051  H1051b  .  .  .  106.6  ?
  H1051a  C1051  H1051c  .  .  .  109.2  ?
  H1051b  C1051  H1051c  .  .  .  107.5  ?
  H1a  O1  H1b  .  .  .  104.5 ?
 

 
_exptl_crystal_F_000                   548
 
loop_
_diffrn_standard_refln_index_h
_diffrn_standard_refln_index_k
_diffrn_standard_refln_index_l
  ?  ?  ?
loop_
_diffrn_attenuator_code
_diffrn_attenuator_scale
  ?  ?
 
__reflns_limit_h_min                    0
_reflns_limit_h_max                    9
_reflns_limit_k_min                    -11
_reflns_limit_k_max                    11
_reflns_limit_l_min                    -20
_reflns_limit_l_max                    19
_reflns_number_observed                ?
_reflns_d_resolution_high              .769
_reflns_d_resolution_low               15.18

 
_diffrn_reflns_av_sigmaI/netI          .066
_diffrn_reflns_theta_min               1.34
_diffrn_reflns_reduction_process       ?
 
_diffrn_ambient_temperature            150
_diffrn_radiation_source              'sealed tube'
_diffrn_radiation_monochromator        graphite
_diffrn_radiation_detector             'CCD area detector'
 
_refine_ls_extinction_expression       ?
_refine_ls_matrix_type                 full         
_refine_ls_number_restraints           0
_refine_ls_number_constraints          0
_refine_ls_R_factor_all                .053
_refine_ls_wR_factor_all               .121
_refine_ls_goodness_of_fit_all         1.138
_refine_ls_shift/su_mean               .002

#===END
data_global
 
_audit_creation_date                   06-05-06
_audit_update_record                   ?
 
#==============================================================================
#   (Publishing Staff Use Only)
 
_journal_date_recd_electronic          ?
_journal_date_to_coeditor              ?
_journal_date_from_coeditor            ?
_journal_date_accepted                 ?
_journal_date_printers_first           ?
_journal_date_printers_final           ?
_journal_date_proofs_out               ?
_journal_date_proofs_in                ?
_journal_coeditor_name                 ?
_journal_coeditor_code                 ?
_journal_coeditor_notes
; ?
;
_journal_techeditor_code               ?
_journal_techeditor_notes
; ?
;
_journal_coden_ASTM                    ?
_journal_name_full                     ?
_journal_year                          ?
_journal_volume                        ?
_journal_issue                         ?
_journal_page_first                    ?
_journal_page_last                     ?
_journal_suppl_publ_number             ?
_journal_suppl_publ_pages              ?
 
#=======================================================================
 
# 1. SUBMISSION DETAILS
#----------------------
 
_publ_contact_author_name
     'Skelton, B. W.'
_publ_contact_author_address
;
   Department of Chemistry
   University of Western Australia
   35 Stirling Highway
   Crawley
   Western Australia 6009
   Australia
;
_publ_contact_author_email            bws@crystal.uwa.edu.au
_publ_contact_author_fax               (+61)_08_6488_1118
_publ_contact_author_phone             (+61)_08_6488_7107
 
 
 
loop_
_publ_author_name
_publ_author_footnote
_publ_author_address
 
 
'Skelton, Brian W.' .
;  Chemistry,
University of Western Australia,
35 Stirling Highway,
Crawley,
WA 6009,
Australia.
;


 
data_cp3cgn
 
_audit_creation_date                    2006-09-05T09:09:04-00:00
_audit_creation_method                  'WinGX routine CIF_UPDATE'
 
#----------------------------------------------------------------------------#
#                   CHEMICAL INFORMATION                                     #
#----------------------------------------------------------------------------#
 
_chemical_name_systematic
;
 ?
;
_chemical_formula_sum                   'C31 H46 Cl4 N4 O0 Rh2'
_chemical_formula_moiety                'C31 H46 Cl4 N4 O0 Rh2'
_chemical_formula_weight                822.34
 
#----------------------------------------------------------------------------#
#                   UNIT CELL INFORMATION                                    #
#----------------------------------------------------------------------------#
_symmetry_cell_setting                  monoclinic
_symmetry_space_group_name_H-M          'P 1 21/m 1'
_symmetry_space_group_name_Hall         -p_2yb
 
loop_
    _symmetry_equiv_pos_as_xyz
'x, y, z'
'-x, y+1/2, -z'
'-x, -y, -z'
'x, -y-1/2, z'
 
_cell_length_a                          9.623(3)
_cell_length_b                          14.176(4)
_cell_length_c                          13.315(4)
_cell_angle_alpha                       90
_cell_angle_beta                        99.136(5)
_cell_angle_gamma                       90
_cell_volume                            1793.3(9)
_cell_formula_units_Z                   2
_cell_measurement_temperature           150(2)
_cell_measurement_reflns_used          3973
_cell_measurement_theta_min            2.43
_cell_measurement_theta_max            29.03

#----------------------------------------------------------------------------#
#                   CRYSTAL INFORMATION                                      #
#----------------------------------------------------------------------------#
_exptl_absorpt_coefficient_mu          1.244
_exptl_crystal_description             plate
_exptl_crystal_size_max                .35
_exptl_crystal_size_mid                .25
_exptl_crystal_size_min                .03
_exptl_crystal_size_rad                ?
_exptl_crystal_colour                  red
_exptl_crystal_density_diffrn           1.523
_exptl_crystal_density_method           'not measured'
_exptl_crystal_F_000                    836
_exptl_special_details
;
 ?
;
 
#----------------------------------------------------------------------------#
#                   ABSORPTION CORRECTION                                    #
#----------------------------------------------------------------------------#
 
_diffrn_measurement_device_type
;
Bruker SMART CCD diffractometer
;
_diffrn_measurement_method             '\w scans'
_diffrn_detector_area_resol_mean       ?
 
_exptl_absorpt_correction_type         multi-scan
_exptl_absorpt_process_details
;
 SADABS; Sheldrick, 1996
;
_exptl_absorpt_correction_T_min        .60
_exptl_absorpt_correction_T_max        1
 
#----------------------------------------------------------------------------#
#                   DATA COLLECTION                                          #
#----------------------------------------------------------------------------#
 
_diffrn_ambient_temperature             150(2)
_diffrn_radiation_wavelength            0.71073
_diffrn_radiation_type                  MoK\a
_diffrn_radiation_monochromator         graphite
_diffrn_reflns_av_R_equivalents         0.1008
_diffrn_reflns_av_unetI/netI            0.1047
_diffrn_reflns_number                   13473
_diffrn_reflns_limit_h_min              -11
_diffrn_reflns_limit_h_max              11
_diffrn_reflns_limit_k_min              -17
_diffrn_reflns_limit_k_max              17
_diffrn_reflns_limit_l_min              -16
_diffrn_reflns_limit_l_max              16
_diffrn_reflns_theta_min                1.55
_diffrn_reflns_theta_max                26
_diffrn_reflns_theta_full               26
_diffrn_measured_fraction_theta_full
                                        0.99
_diffrn_measured_fraction_theta_max
                                        0.99
_reflns_number_total                    3641
_reflns_number_gt                       2500
_reflns_threshold_expression            I>2sigma(I)
 
#----------------------------------------------------------------------------#
#                   COMPUTER PROGRAMS USED                                   #
#----------------------------------------------------------------------------#
_computing_data_collection             'Siemens SMART (Siemens, 1995)'
_computing_cell_refinement             'Siemens SAINT (Siemens, 1995)'
_computing_data_reduction              'Siemens SAINT'
_computing_structure_solution          xtal
_computing_molecular_graphics          xtal
_computing_publication_material       'WinGX'
 
_computing_structure_refinement         'SHELXL-97 (Sheldrick, 1997)'
 
#----------------------------------------------------------------------------#
#                   REFINEMENT INFORMATION                                   #
#----------------------------------------------------------------------------#
 
_refine_special_details
;
 Refinement of F^2^ against ALL reflections.  The weighted R-factor wR and
 goodness of fit S are based on F^2^, conventional R-factors R are based
 on F, with F set to zero for negative F^2^. The threshold expression of
 F^2^ > 2sigma(F^2^) is used only for calculating R-factors(gt) etc. and is
 not relevant to the choice of reflections for refinement.  R-factors based
 on F^2^ are statistically about twice as large as those based on F, and R-
 factors based on ALL data will be even larger.
;
_refine_ls_structure_factor_coef        Fsqd
_refine_ls_matrix_type                  full
_refine_ls_weighting_scheme             calc
_refine_ls_weighting_details
         'calc w=1/[\s^2^(Fo^2^)+(0.2000P)^2^] where P=(Fo^2^+2Fc^2^)/3'
_atom_sites_solution_primary            direct
_atom_sites_solution_secondary          difmap
_atom_sites_solution_hydrogens          geom
_refine_ls_hydrogen_treatment           constr
_refine_ls_extinction_method            none
_refine_ls_number_reflns                3641
_refine_ls_number_parameters            193
_refine_ls_number_restraints            0
_refine_ls_R_factor_all                 0.1449
_refine_ls_R_factor_gt                  0.108
_refine_ls_wR_factor_ref                0.299
_refine_ls_wR_factor_gt                 0.279
_refine_ls_goodness_of_fit_ref          1.09
_refine_ls_restrained_S_all             1.09
_refine_ls_shift/su_max                 0.001
_refine_ls_shift/su_mean                0
_refine_diff_density_max                4.76
_refine_diff_density_min                -0.991
_refine_diff_density_rms                0.319
 
#----------------------------------------------------------------------------#
#                   ATOMIC TYPES, COORDINATES AND THERMAL PARAMETERS         #
#----------------------------------------------------------------------------#
 
loop_
    _atom_type_symbol
    _atom_type_description
    _atom_type_scat_dispersion_real
    _atom_type_scat_dispersion_imag
    _atom_type_scat_source
C C 0.0033 0.0016 'International Tables Vol C Tables 4.2.6.8 and 6.1.1.4'
H H 0 0 'International Tables Vol C Tables 4.2.6.8 and 6.1.1.4'
Cl Cl 0.1484 0.1585 'International Tables Vol C Tables 4.2.6.8 and 6.1.1.4'
N N 0.0061 0.0033 'International Tables Vol C Tables 4.2.6.8 and 6.1.1.4'
Rh Rh -1.1178 0.9187 'International Tables Vol C Tables 4.2.6.8 and 6.1.1.4'
O O 0.0106 0.006 'International Tables Vol C Tables 4.2.6.8 and 6.1.1.4'
 
loop_
    _atom_site_label
    _atom_site_type_symbol
    _atom_site_fract_x
    _atom_site_fract_y
    _atom_site_fract_z
    _atom_site_U_iso_or_equiv
    _atom_site_adp_type
    _atom_site_occupancy
    _atom_site_symmetry_multiplicity
    _atom_site_calc_flag
    _atom_site_refinement_flags
    _atom_site_disorder_assembly
    _atom_site_disorder_group
Rh1 Rh 0.43856(10) 0.25 0.32548(9) 0.0266(4) Uani 1 2 d S . .
Rh2 Rh 0.16852(12) 0.25 0.77589(9) 0.0348(4) Uani 1 2 d S . .
Cl1 Cl 0.3499(4) 0.25 0.1475(3) 0.0438(10) Uani 1 2 d S . .
Cl21 Cl -0.0613(4) 0.25 0.6710(4) 0.0515(11) Uani 1 2 d S B .
Cl22 Cl 0.2447(3) 0.12595(17) 0.6713(2) 0.0416(7) Uani 1 1 d . . .
N11 N 0.1825(8) 0.3341(5) 0.3985(7) 0.0287(18) Uani 1 1 d . . .
N12 N 0.2844(8) 0.3529(6) 0.3416(7) 0.035(2) Uani 1 1 d . A .
C13 C 0.2524(10) 0.4373(7) 0.2991(8) 0.035(2) Uani 1 1 d . . .
C131 C 0.3367(14) 0.4844(9) 0.2311(10) 0.057(4) Uani 1 1 d . A .
H13A H 0.3669 0.5464 0.2591 0.086 Uiso 1 1 calc R . .
H13B H 0.2799 0.4923 0.1638 0.086 Uiso 1 1 calc R . .
H13C H 0.4197 0.446 0.2252 0.086 Uiso 1 1 calc R . .
C14 C 0.1264(11) 0.4683(7) 0.3276(8) 0.036(2) Uani 1 1 d . A .
H14 H 0.0795 0.5257 0.3069 0.043 Uiso 1 1 calc R . .
C15 C 0.0830(9) 0.4039(6) 0.3885(8) 0.027(2) Uani 1 1 d . A .
C151 C -0.0420(10) 0.3974(7) 0.4423(9) 0.037(3) Uani 1 1 d . . .
H15A H -0.01 0.3918 0.5157 0.056 Uiso 1 1 calc R A .
H15B H -0.098 0.3419 0.418 0.056 Uiso 1 1 calc R . .
H15C H -0.0997 0.4543 0.4285 0.056 Uiso 1 1 calc R . .
C10 C 0.1913(12) 0.25 0.4614(10) 0.025(3) Uani 1 2 d S . .
H101 H 0.1136 0.25 0.502 0.029 Uiso 1 2 calc SR . .
H102 H 0.2814 0.25 0.5091 0.029 Uiso 1 2 calc SR . .
C101 C 0.5903(16) 0.238(2) 0.4624(11) 0.031(5) Uiso 0.5 1 d P A -1
C102 C 0.615(2) 0.3247(15) 0.4207(18) 0.019(5) Uiso 0.5 1 d P A -1
C103 C 0.648(2) 0.3025(16) 0.325(2) 0.021(6) Uiso 0.5 1 d P A -1
C104 C 0.641(2) 0.1973(16) 0.297(2) 0.024(7) Uiso 0.5 1 d P A -1
C105 C 0.613(2) 0.1641(16) 0.390(2) 0.025(6) Uiso 0.5 1 d P A -1
C106 C 0.563(2) 0.2245(13) 0.5725(13) 0.033(5) Uiso 0.5 1 d P A -1
H10A H 0.634 0.2594 0.619 0.05 Uiso 0.5 1 calc PR A -1
H10B H 0.5685 0.1573 0.5901 0.05 Uiso 0.5 1 calc PR A -1
H10C H 0.4692 0.2485 0.5785 0.05 Uiso 1 2 calc SR A -1
C107 C 0.609(2) 0.4185(14) 0.4626(16) 0.026(4) Uiso 0.5 1 d P A -1
H10D H 0.5841 0.4639 0.4072 0.038 Uiso 0.5 1 calc PR A -1
H10E H 0.7016 0.4348 0.501 0.038 Uiso 0.5 1 calc PR A -1
H10F H 0.5385 0.4203 0.5079 0.038 Uiso 0.5 1 calc PR A -1
C108 C 0.690(2) 0.3660(16) 0.2465(19) 0.027(5) Uiso 0.5 1 d P A -1
H10G H 0.7001 0.4305 0.2732 0.04 Uiso 0.5 1 calc PR A -1
H10H H 0.6184 0.3646 0.1856 0.04 Uiso 0.5 1 calc PR A -1
H10I H 0.7806 0.345 0.2291 0.04 Uiso 0.5 1 calc PR A -1
C109 C 0.681(2) 0.1448(17) 0.2129(19) 0.030(6) Uiso 0.5 1 d P A -1
H10J H 0.7831 0.1375 0.2231 0.045 Uiso 0.5 1 calc PR A -1
H10K H 0.6496 0.1788 0.1492 0.045 Uiso 0.5 1 calc PR A -1
H10L H 0.6361 0.0824 0.2095 0.045 Uiso 0.5 1 calc PR A -1
C100 C 0.594(3) 0.0597(17) 0.4178(19) 0.039(5) Uiso 0.5 1 d P A -1
H10M H 0.5013 0.0507 0.4374 0.059 Uiso 0.5 1 calc PR A -1
H10N H 0.6672 0.042 0.4748 0.059 Uiso 0.5 1 calc PR A -1
H10O H 0.6027 0.02 0.3588 0.059 Uiso 0.5 1 calc PR A -1
C201 C 0.081(2) 0.2268(15) 0.9136(15) 0.038(5) Uiso 0.5 1 d P B -2
C202 C 0.142(3) 0.319(2) 0.9127(18) 0.035(6) Uiso 0.5 1 d P B -2
C203 C 0.285(2) 0.3113(17) 0.9092(15) 0.025(5) Uiso 0.5 1 d P B -2
C204 C 0.321(3) 0.2137(17) 0.9084(18) 0.039(7) Uiso 0.5 1 d P B -2
C205 C 0.183(4) 0.162(2) 0.905(2) 0.049(8) Uiso 0.5 1 d P B -2
C206 C -0.074(3) 0.2183(18) 0.915(2) 0.059(5) Uiso 0.5 1 d P B -2
H20A H -0.0977 0.1524 0.9272 0.088 Uiso 0.5 1 calc PR B -2
H20B H -0.1265 0.2393 0.85 0.088 Uiso 0.5 1 calc PR B -2
H20C H -0.0998 0.2578 0.9701 0.088 Uiso 0.5 1 calc PR B -2
C207 C 0.074(7) 0.401(4) 0.923(5) 0.154(16) Uiso 0.5 1 d P B -2
H20D H 0.1393 0.4542 0.9235 0.232 Uiso 0.5 1 calc PR B -2
H20E H 0.0347 0.4005 0.9864 0.232 Uiso 0.5 1 calc PR B -2
H20F H -0.0032 0.4087 0.8653 0.232 Uiso 0.5 1 calc PR B -2
C208 C 0.362(7) 0.391(4) 0.913(5) 0.154(16) Uiso 0.5 1 d P B -2
H20G H 0.3025 0.4446 0.9244 0.232 Uiso 0.5 1 calc PR B -2
H20H H 0.3976 0.3989 0.8489 0.232 Uiso 0.5 1 calc PR B -2
H20I H 0.441 0.3863 0.9692 0.232 Uiso 0.5 1 calc PR B -2
C209 C 0.436(3) 0.140(2) 0.910(2) 0.059(5) Uiso 0.5 1 d P B -2
H20J H 0.5192 0.1602 0.9577 0.088 Uiso 0.5 1 calc PR B -2
H20K H 0.4603 0.1335 0.842 0.088 Uiso 0.5 1 calc PR B -2
H20L H 0.4025 0.0795 0.9325 0.088 Uiso 0.5 1 calc PR B -2
C200 C 0.136(3) 0.060(2) 0.910(2) 0.062(7) Uiso 0.5 1 d P B -2
H20M H 0.1795 0.0315 0.9743 0.093 Uiso 0.5 1 calc PR B -2
H20N H 0.1643 0.0245 0.8531 0.093 Uiso 0.5 1 calc PR B -2
H20O H 0.0332 0.0575 0.9049 0.093 Uiso 0.5 1 calc PR B -2
 
loop_
    _atom_site_aniso_label
    _atom_site_aniso_U_11
    _atom_site_aniso_U_22
    _atom_site_aniso_U_33
    _atom_site_aniso_U_23
    _atom_site_aniso_U_13
    _atom_site_aniso_U_12
Rh1 0.0164(6) 0.0148(6) 0.0502(8) 0 0.0098(4) 0
Rh2 0.0310(7) 0.0248(7) 0.0485(8) 0 0.0066(5) 0
Cl1 0.034(2) 0.046(2) 0.053(2) 0 0.0100(17) 0
Cl21 0.0261(19) 0.057(3) 0.071(3) 0 0.0066(18) 0
Cl22 0.0508(16) 0.0184(12) 0.0546(17) 0.0008(11) 0.0048(12) 0.0011(11)
N11 0.019(4) 0.018(4) 0.050(5) 0.001(4) 0.010(3) 0.003(3)
N12 0.021(4) 0.015(4) 0.071(6) 0.006(4) 0.013(4) -0.002(3)
C13 0.023(5) 0.022(5) 0.061(7) 0.012(5) 0.015(4) 0.005(4)
C131 0.067(9) 0.039(7) 0.074(9) 0.011(6) 0.037(7) 0.000(6)
C14 0.034(5) 0.017(5) 0.059(7) 0.009(4) 0.014(5) 0.010(4)
C15 0.013(4) 0.018(5) 0.052(6) -0.003(4) 0.006(4) 0.005(3)
C151 0.012(4) 0.024(5) 0.078(8) -0.005(5) 0.015(5) 0.003(4)
C10 0.015(6) 0.012(6) 0.045(8) 0 0.000(5) 0
 
 
#----------------------------------------------------------------------------#
#                   MOLECULAR GEOMETRY                                       #
#----------------------------------------------------------------------------#
 
_geom_special_details
;
 All esds (except the esd in the dihedral angle between two l.s. planes)
 are estimated using the full covariance matrix.  The cell esds are taken
 into account individually in the estimation of esds in distances, angles
 and torsion angles; correlations between esds in cell parameters are only
 used when they are defined by crystal symmetry.  An approximate (isotropic)
 treatment of cell esds is used for estimating esds involving l.s. planes.
;
loop_
    _geom_bond_atom_site_label_1
    _geom_bond_atom_site_label_2
    _geom_bond_distance
    _geom_bond_site_symmetry_2
    _geom_bond_publ_flag
Rh1 N12 2.116(8) 4_565 ?
Rh1 N12 2.116(8) . ?
Rh1 C105 2.14(2) 4_565 ?
Rh1 C105 2.14(2) . ?
Rh1 C103 2.15(2) . ?
Rh1 C103 2.15(2) 4_565 ?
Rh1 C101 2.154(16) 4_565 ?
Rh1 C101 2.154(16) . ?
Rh1 C104 2.17(2) 4_565 ?
Rh1 C104 2.17(2) . ?
Rh1 C102 2.22(2) . ?
Rh1 C102 2.22(2) 4_565 ?
Rh2 C205 2.11(3) 4_565 ?
Rh2 C205 2.11(3) . ?
Rh2 C202 2.12(2) . ?
Rh2 C202 2.12(2) 4_565 ?
Rh2 C203 2.13(2) . ?
Rh2 C203 2.13(2) 4_565 ?
Rh2 C201 2.16(2) . ?
Rh2 C201 2.16(2) 4_565 ?
Rh2 C204 2.17(2) 4_565 ?
Rh2 C204 2.17(2) . ?
Rh2 Cl21 2.421(4) . ?
Rh2 Cl22 2.427(3) 4_565 ?
N11 N12 1.358(11) . ?
N11 C15 1.369(11) . ?
N11 C10 1.451(11) . ?
N12 C13 1.339(12) . ?
C13 C14 1.398(13) . ?
C13 C131 1.469(14) . ?
C131 H13A 0.98 . ?
C131 H13B 0.98 . ?
C131 H13C 0.98 . ?
C14 C15 1.332(14) . ?
C14 H14 0.95 . ?
C15 C151 1.497(12) . ?
C151 H15A 0.98 . ?
C151 H15B 0.98 . ?
C151 H15C 0.98 . ?
C10 N11 1.451(11) 4_565 ?
C10 H101 0.99 . ?
C10 H102 0.99 . ?
C101 C102 1.39(4) . ?
C101 C105 1.46(3) . ?
C101 C106 1.54(2) . ?
C102 C103 1.40(3) . ?
C102 C107 1.45(3) . ?
C103 C108 1.48(3) . ?
C103 C104 1.54(2) . ?
C104 C105 1.40(3) . ?
C104 C109 1.44(3) . ?
C105 C100 1.54(3) . ?
C106 H10A 0.98 . ?
C106 H10B 0.98 . ?
C106 H10C 0.98 . ?
C107 H10D 0.98 . ?
C107 H10E 0.98 . ?
C107 H10F 0.98 . ?
C108 H10G 0.98 . ?
C108 H10H 0.98 . ?
C108 H10I 0.98 . ?
C109 H10J 0.98 . ?
C109 H10K 0.98 . ?
C109 H10L 0.98 . ?
C100 H10M 0.98 . ?
C100 H10N 0.98 . ?
C100 H10O 0.98 . ?
C201 C205 1.36(4) . ?
C201 C202 1.44(4) . ?
C201 C206 1.50(3) . ?
C202 C207 1.36(6) . ?
C202 C203 1.39(3) . ?
C203 C208 1.34(6) . ?
C203 C204 1.42(3) . ?
C204 C205 1.50(4) . ?
C204 C209 1.52(4) . ?
C205 C200 1.53(4) . ?
C206 H20A 0.98 . ?
C206 H20B 0.98 . ?
C206 H20C 0.98 . ?
C207 H20D 0.98 . ?
C207 H20E 0.98 . ?
C207 H20F 0.98 . ?
C208 H20G 0.98 . ?
C208 H20H 0.98 . ?
C208 H20I 0.98 . ?
C209 H20J 0.98 . ?
C209 H20K 0.98 . ?
C209 H20L 0.98 . ?
C200 H20M 0.98 . ?
C200 H20N 0.98 . ?
C200 H20O 0.98 . ?
 
loop_
    _geom_angle_atom_site_label_1
    _geom_angle_atom_site_label_2
    _geom_angle_atom_site_label_3
    _geom_angle
    _geom_angle_site_symmetry_1
    _geom_angle_site_symmetry_3
    _geom_angle_publ_flag
N12 Rh1 N12 87.2(4) 4_565 . ?
N12 Rh1 C105 150.3(7) 4_565 4_565 ?
N12 Rh1 C105 94.8(6) . 4_565 ?
N12 Rh1 C105 94.8(6) 4_565 . ?
N12 Rh1 C105 150.3(7) . . ?
C105 Rh1 C105 69.4(12) 4_565 . ?
N12 Rh1 C103 155.8(6) 4_565 . ?
N12 Rh1 C103 115.8(6) . . ?
C105 Rh1 C103 29.5(8) 4_565 . ?
C105 Rh1 C103 61.5(8) . . ?
N12 Rh1 C103 115.8(6) 4_565 4_565 ?
N12 Rh1 C103 155.8(6) . 4_565 ?
C105 Rh1 C103 61.5(8) 4_565 4_565 ?
C105 Rh1 C103 29.5(8) . 4_565 ?
C103 Rh1 C103 40.4(12) . 4_565 ?
N12 Rh1 C101 111.2(7) 4_565 4_565 ?
N12 Rh1 C101 104.4(7) . 4_565 ?
C105 Rh1 C101 39.6(9) 4_565 4_565 ?
C105 Rh1 C101 47.4(10) . 4_565 ?
C103 Rh1 C101 57.7(8) . 4_565 ?
C103 Rh1 C101 61.5(9) 4_565 4_565 ?
N12 Rh1 C101 104.4(7) 4_565 . ?
N12 Rh1 C101 111.2(7) . . ?
C105 Rh1 C101 47.4(10) 4_565 . ?
C105 Rh1 C101 39.6(9) . . ?
C103 Rh1 C101 61.5(9) . . ?
C103 Rh1 C101 57.7(8) 4_565 . ?
C101 Rh1 C101 9.4(16) 4_565 . ?
N12 Rh1 C104 156.4(6) 4_565 4_565 ?
N12 Rh1 C104 116.3(6) . 4_565 ?
C105 Rh1 C104 37.8(9) 4_565 4_565 ?
C105 Rh1 C104 66.5(8) . 4_565 ?
C103 Rh1 C104 9.8(9) . 4_565 ?
C103 Rh1 C104 41.6(5) 4_565 4_565 ?
C101 Rh1 C104 67.4(8) 4_565 4_565 ?
C101 Rh1 C104 70.9(9) . 4_565 ?
N12 Rh1 C104 116.3(6) 4_565 . ?
N12 Rh1 C104 156.4(6) . . ?
C105 Rh1 C104 66.5(8) 4_565 . ?
C105 Rh1 C104 37.8(9) . . ?
C103 Rh1 C104 41.6(5) . . ?
C103 Rh1 C104 9.8(9) 4_565 . ?
C101 Rh1 C104 70.9(9) 4_565 . ?
C101 Rh1 C104 67.4(8) . . ?
C104 Rh1 C104 40.2(12) 4_565 . ?
N12 Rh1 C102 139.1(7) 4_565 . ?
N12 Rh1 C102 95.6(6) . . ?
C105 Rh1 C102 11.2(7) 4_565 . ?
C105 Rh1 C102 64.0(8) . . ?
C103 Rh1 C102 37.4(9) . . ?
C103 Rh1 C102 62.3(8) 4_565 . ?
C101 Rh1 C102 28.8(9) 4_565 . ?
C101 Rh1 C102 37.0(10) . . ?
C104 Rh1 C102 46.6(9) 4_565 . ?
C104 Rh1 C102 69.0(9) . . ?
N12 Rh1 C102 95.6(6) 4_565 4_565 ?
N12 Rh1 C102 139.1(7) . 4_565 ?
C105 Rh1 C102 64.0(8) 4_565 4_565 ?
C105 Rh1 C102 11.2(7) . 4_565 ?
C103 Rh1 C102 62.3(8) . 4_565 ?
C103 Rh1 C102 37.4(9) 4_565 4_565 ?
C101 Rh1 C102 37.0(10) 4_565 4_565 ?
C101 Rh1 C102 28.8(9) . 4_565 ?
C104 Rh1 C102 69.0(9) 4_565 4_565 ?
C104 Rh1 C102 46.6(9) . 4_565 ?
C102 Rh1 C102 57.0(11) . 4_565 ?
C205 Rh2 C205 72.1(17) 4_565 . ?
C205 Rh2 C202 13.5(10) 4_565 . ?
C205 Rh2 C202 64.7(11) . . ?
C205 Rh2 C202 64.7(11) 4_565 4_565 ?
C205 Rh2 C202 13.5(10) . 4_565 ?
C202 Rh2 C202 55.1(15) . 4_565 ?
C205 Rh2 C203 28.6(9) 4_565 . ?
C205 Rh2 C203 66.5(10) . . ?
C202 Rh2 C203 38.2(9) . . ?
C202 Rh2 C203 65.9(9) 4_565 . ?
C205 Rh2 C203 66.5(10) 4_565 4_565 ?
C205 Rh2 C203 28.6(9) . 4_565 ?
C202 Rh2 C203 65.9(9) . 4_565 ?
C202 Rh2 C203 38.2(9) 4_565 4_565 ?
C203 Rh2 C203 48.1(13) . 4_565 ?
C205 Rh2 C201 51.8(11) 4_565 . ?
C205 Rh2 C201 37.1(10) . . ?
C202 Rh2 C201 39.2(11) . . ?
C202 Rh2 C201 23.7(8) 4_565 . ?
C203 Rh2 C201 65.2(8) . . ?
C203 Rh2 C201 57.1(8) 4_565 . ?
C205 Rh2 C201 37.1(10) 4_565 4_565 ?
C205 Rh2 C201 51.8(11) . 4_565 ?
C202 Rh2 C201 23.7(8) . 4_565 ?
C202 Rh2 C201 39.2(11) 4_565 4_565 ?
C203 Rh2 C201 57.1(8) . 4_565 ?
C203 Rh2 C201 65.2(8) 4_565 4_565 ?
C201 Rh2 C201 17.5(11) . 4_565 ?
C205 Rh2 C204 41.1(10) 4_565 4_565 ?
C205 Rh2 C204 61.7(11) . 4_565 ?
C202 Rh2 C204 49.2(10) . 4_565 ?
C202 Rh2 C204 64.3(9) 4_565 4_565 ?
C203 Rh2 C204 13.0(8) . 4_565 ?
C203 Rh2 C204 38.7(10) 4_565 4_565 ?
C201 Rh2 C204 69.4(9) . 4_565 ?
C201 Rh2 C204 64.9(9) 4_565 4_565 ?
C205 Rh2 C204 61.7(11) 4_565 . ?
C205 Rh2 C204 41.1(10) . . ?
C202 Rh2 C204 64.3(9) . . ?
C202 Rh2 C204 49.2(10) 4_565 . ?
C203 Rh2 C204 38.7(10) . . ?
C203 Rh2 C204 13.0(8) 4_565 . ?
C201 Rh2 C204 64.9(9) . . ?
C201 Rh2 C204 69.4(9) 4_565 . ?
C204 Rh2 C204 27.5(13) 4_565 . ?
C205 Rh2 Cl21 114.1(9) 4_565 . ?
C205 Rh2 Cl21 114.1(9) . . ?
C202 Rh2 Cl21 105.9(7) . . ?
C202 Rh2 Cl21 105.9(7) 4_565 . ?
C203 Rh2 Cl21 142.6(7) . . ?
C203 Rh2 Cl21 142.6(7) 4_565 . ?
C201 Rh2 Cl21 92.6(6) . . ?
C201 Rh2 Cl21 92.6(6) 4_565 . ?
C204 Rh2 Cl21 155.0(7) 4_565 . ?
C204 Rh2 Cl21 155.0(7) . . ?
C205 Rh2 Cl22 93.1(9) 4_565 4_565 ?
C205 Rh2 Cl22 155.1(9) . 4_565 ?
C202 Rh2 Cl22 104.2(8) . 4_565 ?
C202 Rh2 Cl22 156.4(7) 4_565 4_565 ?
C203 Rh2 Cl22 90.8(6) . 4_565 ?
C203 Rh2 Cl22 127.3(7) 4_565 4_565 ?
C201 Rh2 Cl22 142.3(6) . 4_565 ?
C201 Rh2 Cl22 124.8(6) 4_565 4_565 ?
C204 Rh2 Cl22 93.9(6) 4_565 4_565 ?
C204 Rh2 Cl22 114.4(7) . 4_565 ?
Cl21 Rh2 Cl22 90.04(10) . 4_565 ?
N12 N11 C15 111.1(8) . . ?
N12 N11 C10 120.1(8) . . ?
C15 N11 C10 128.8(9) . . ?
C13 N12 N11 105.9(8) . . ?
C13 N12 Rh1 133.7(7) . . ?
N11 N12 Rh1 120.1(6) . . ?
N12 C13 C14 108.5(8) . . ?
N12 C13 C131 123.7(9) . . ?
C14 C13 C131 127.7(10) . . ?
C13 C131 H13A 109.5 . . ?
C13 C131 H13B 109.5 . . ?
H13A C131 H13B 109.5 . . ?
C13 C131 H13C 109.5 . . ?
H13A C131 H13C 109.5 . . ?
H13B C131 H13C 109.5 . . ?
C15 C14 C13 108.6(9) . . ?
C15 C14 H14 125.7 . . ?
C13 C14 H14 125.7 . . ?
C14 C15 N11 105.8(8) . . ?
C14 C15 C151 133.4(9) . . ?
N11 C15 C151 120.7(8) . . ?
C15 C151 H15A 109.5 . . ?
C15 C151 H15B 109.5 . . ?
H15A C151 H15B 109.5 . . ?
C15 C151 H15C 109.5 . . ?
H15A C151 H15C 109.5 . . ?
H15B C151 H15C 109.5 . . ?
N11 C10 N11 110.4(11) . 4_565 ?
N11 C10 H101 109.6 . . ?
N11 C10 H101 109.6 4_565 . ?
N11 C10 H102 109.6 . . ?
N11 C10 H102 109.6 4_565 . ?
H101 C10 H102 108.1 . . ?
C102 C101 C105 108.7(14) . . ?
C102 C101 C106 124(2) . . ?
C105 C101 C106 127(2) . . ?
C102 C101 Rh1 74.0(12) . . ?
C105 C101 Rh1 69.7(11) . . ?
C106 C101 Rh1 128.3(12) . . ?
C101 C102 C103 104.1(18) . . ?
C101 C102 C107 130.1(19) . . ?
C103 C102 C107 126(2) . . ?
C101 C102 Rh1 69.0(11) . . ?
C103 C102 Rh1 68.8(12) . . ?
C107 C102 Rh1 126.0(14) . . ?
C102 C103 C108 129(2) . . ?
C102 C103 C104 115(2) . . ?
C108 C103 C104 115(2) . . ?
C102 C103 Rh1 73.8(13) . . ?
C108 C103 Rh1 125.1(17) . . ?
C104 C103 Rh1 69.9(14) . . ?
C105 C104 C109 129(2) . . ?
C105 C104 C103 97(2) . . ?
C109 C104 C103 133(2) . . ?
C105 C104 Rh1 69.8(13) . . ?
C109 C104 Rh1 132.0(18) . . ?
C103 C104 Rh1 68.5(14) . . ?
C104 C105 C101 115(2) . . ?
C104 C105 C100 126(2) . . ?
C101 C105 C100 120(2) . . ?
C104 C105 Rh1 72.4(13) . . ?
C101 C105 Rh1 70.6(11) . . ?
C100 C105 Rh1 121.9(15) . . ?
C205 C201 C202 107.9(19) . . ?
C205 C201 C206 133(2) . . ?
C202 C201 C206 118.9(19) . . ?
C205 C201 Rh2 69.5(15) . . ?
C202 C201 Rh2 68.8(13) . . ?
C206 C201 Rh2 123.2(15) . . ?
C207 C202 C203 125(4) . . ?
C207 C202 C201 125(4) . . ?
C203 C202 C201 110(2) . . ?
C207 C202 Rh2 127(3) . . ?
C203 C202 Rh2 71.4(13) . . ?
C201 C202 Rh2 72.0(14) . . ?
C208 C203 C202 118(4) . . ?
C208 C203 C204 133(3) . . ?
C202 C203 C204 108(2) . . ?
C208 C203 Rh2 126(3) . . ?
C202 C203 Rh2 70.4(13) . . ?
C204 C203 Rh2 72.1(16) . . ?
C203 C204 C205 105(2) . . ?
C203 C204 C209 147(3) . . ?
C205 C204 C209 108(2) . . ?
C203 C204 Rh2 69.2(15) . . ?
C205 C204 Rh2 67.4(15) . . ?
C209 C204 Rh2 125.0(18) . . ?
C201 C205 C204 108(2) . . ?
C201 C205 C200 114(3) . . ?
C204 C205 C200 137(3) . . ?
C201 C205 Rh2 73.4(15) . . ?
C204 C205 Rh2 71.5(15) . . ?
C200 C205 Rh2 128(2) . . ?
C201 C206 H20A 109.5 . . ?
C201 C206 H20B 109.5 . . ?
H20A C206 H20B 109.5 . . ?
C201 C206 H20C 109.5 . . ?
H20A C206 H20C 109.5 . . ?
H20B C206 H20C 109.5 . . ?
C202 C207 H20D 109.5 . . ?
C202 C207 H20E 109.5 . . ?
H20D C207 H20E 109.5 . . ?
C202 C207 H20F 109.5 . . ?
H20D C207 H20F 109.5 . . ?
H20E C207 H20F 109.5 . . ?
C203 C208 H20G 109.5 . . ?
C203 C208 H20H 109.5 . . ?
H20G C208 H20H 109.5 . . ?
C203 C208 H20I 109.5 . . ?
H20G C208 H20I 109.5 . . ?
H20H C208 H20I 109.5 . . ?
C204 C209 H20J 109.5 . . ?
C204 C209 H20K 109.5 . . ?
H20J C209 H20K 109.5 . . ?
C204 C209 H20L 109.5 . . ?
H20J C209 H20L 109.5 . . ?
H20K C209 H20L 109.5 . . ?
C205 C200 H20M 109.5 . . ?
C205 C200 H20N 109.5 . . ?
H20M C200 H20N 109.5 . . ?
C205 C200 H20O 109.5 . . ?
H20M C200 H20O 109.5 . . ?
H20N C200 H20O 109.5 . . ?
#===END 
data_global
 
_audit_creation_date                   06-05-06
_audit_update_record                   ?
 
#==============================================================================
#   (Publishing Staff Use Only)
 
_journal_date_recd_electronic          ?
_journal_date_to_coeditor              ?
_journal_date_from_coeditor            ?
_journal_date_accepted                 ?
_journal_date_printers_first           ?
_journal_date_printers_final           ?
_journal_date_proofs_out               ?
_journal_date_proofs_in                ?
_journal_coeditor_name                 ?
_journal_coeditor_code                 ?
_journal_coeditor_notes
; ?
;
_journal_techeditor_code               ?
_journal_techeditor_notes
; ?
;
_journal_coden_ASTM                    ?
_journal_name_full                     ?
_journal_year                          ?
_journal_volume                        ?
_journal_issue                         ?
_journal_page_first                    ?
_journal_page_last                     ?
_journal_suppl_publ_number             ?
_journal_suppl_publ_pages              ?
 
#=======================================================================
 
# 1. SUBMISSION DETAILS
#----------------------
 
_publ_contact_author_name
     'Skelton, B. W.'
_publ_contact_author_address
;
   Department of Chemistry
   University of Western Australia
   35 Stirling Highway
   Crawley
   Western Australia 6009
   Australia
;
_publ_contact_author_email            bws@crystal.uwa.edu.au
_publ_contact_author_fax               (+61)_08_6488_1118
_publ_contact_author_phone             (+61)_08_6488_7107
 
 
 
loop_
_publ_author_name
_publ_author_footnote
_publ_author_address
 
 
'Skelton, Brian W.' .
;  Chemistry,
University of Western Australia,
35 Stirling Highway,
Crawley,
WA 6009,
Australia.
;


 
data_cprh1r
 
_audit_creation_date                    2006-08-25T14:06:28-00:00
_audit_creation_method                  'WinGX routine CIF_UPDATE'
 
#----------------------------------------------------------------------------#
#                   CHEMICAL INFORMATION                                     #
#----------------------------------------------------------------------------#
 
_chemical_name_systematic
;
 ?
;
_chemical_formula_sum                   'C21 H35 Cl2 N4 O2 Rh'
_chemical_formula_moiety          'C21 H31 Cl N4 Rh, Cl, 2(H2 O)'
_chemical_formula_weight                549.34
 
#----------------------------------------------------------------------------#
#                   UNIT CELL INFORMATION                                    #
#----------------------------------------------------------------------------#
 
_symmetry_cell_setting                  monoclinic
_symmetry_space_group_name_H-M          'P 1 21/n 1'
_symmetry_space_group_name_Hall          -p_2yn

loop_
    _symmetry_equiv_pos_as_xyz
'x, y, z'
'-x+1/2, y+1/2, -z+1/2'
'-x, -y, -z'
'x-1/2, -y-1/2, z-1/2'
 
_cell_length_a                          15.765(2)
_cell_length_b                          8.3050(10)
_cell_length_c                          18.554(2)
_cell_angle_alpha                       90
_cell_angle_beta                        90.261(9)
_cell_angle_gamma                       90
_cell_volume                            2429.2(5)
_cell_formula_units_Z                   4
_cell_measurement_temperature           100(2)
_cell_measurement_reflns_used           35381
_cell_measurement_theta_min             2.6862
_cell_measurement_theta_max             36.1298
 
#----------------------------------------------------------------------------#
#                   CRYSTAL INFORMATION                                      #
#----------------------------------------------------------------------------#
 
_exptl_crystal_description              plate
_exptl_crystal_colour                   orange
_exptl_crystal_size_max                 0.38
_exptl_crystal_size_mid                 0.24
_exptl_crystal_size_min                 0.12
_exptl_crystal_density_diffrn           1.502
_exptl_crystal_density_method           'not measured'
_exptl_crystal_F_000                    1136
_exptl_special_details
;
 ?
;
 
#----------------------------------------------------------------------------#
#                   ABSORPTION CORRECTION                                    #
#----------------------------------------------------------------------------#
 
_exptl_absorpt_coefficient_mu           0.947
_exptl_absorpt_correction_type          multi-scan
_exptl_absorpt_process_details
;
        CrysAlis RED, Oxford Diffraction Ltd.,
        Version 1.171.30.5 (release 12-06-2006 CrysAlis171 .NET)
        (compiled Jun 12 2006,17:01:16)
        Empirical absorption correction using spherical harmonics,
 implemented in SCALE3 ABSPACK scaling algorithm.
;
_exptl_absorpt_correction_T_min         0.85038
_exptl_absorpt_correction_T_max         1
 
#----------------------------------------------------------------------------#
#                   DATA COLLECTION                                          #
#----------------------------------------------------------------------------#
 
_diffrn_ambient_temperature             100(2)
_diffrn_radiation_wavelength            0.71073
_diffrn_radiation_type                  MoK\a
_diffrn_radiation_monochromator         graphite
_diffrn_detector_area_resol_mean        16.0009
_diffrn_orient_matrix_ub_11             -0.040423873
_diffrn_orient_matrix_ub_12             0.001509604
_diffrn_orient_matrix_ub_13             0.0172560823
_diffrn_orient_matrix_ub_21             0.0195235183
_diffrn_orient_matrix_ub_22             -0.01769424
_diffrn_orient_matrix_ub_23             0.0335797713
_diffrn_orient_matrix_ub_31             0.0048369634
_diffrn_orient_matrix_ub_32             0.0838541552
_diffrn_orient_matrix_ub_33             0.0067681983
_diffrn_reflns_av_R_equivalents         0.0358
_diffrn_reflns_av_unetI/netI            0.0326
_diffrn_reflns_number                   71975
_diffrn_reflns_limit_h_min              -25
_diffrn_reflns_limit_h_max              25
_diffrn_reflns_limit_k_min              -13
_diffrn_reflns_limit_k_max              13
_diffrn_reflns_limit_l_min              -29
_diffrn_reflns_limit_l_max              29
_diffrn_reflns_theta_min                2.69
_diffrn_reflns_theta_max                35
_diffrn_reflns_theta_full               35
_diffrn_measured_fraction_theta_full   0.999
_diffrn_measured_fraction_theta_max    0.999
_diffrn_measurement_device_type
;
 Oxford Diffraction Xcalibur diffractometer
;
_diffrn_measurement_method              '\w scans'

_reflns_number_total                    10706
_reflns_number_gt                       8169
_reflns_threshold_expression            I>2sigma(I)
 
#----------------------------------------------------------------------------#
#                   COMPUTER PROGRAMS USED                                   #
#----------------------------------------------------------------------------#
 
_computing_data_collection
;
        CrysAlis CCD, Oxford Diffraction Ltd.,
        Version 1.171.30.5 (release 12-06-2006 CrysAlis171 .NET)
        (compiled Jun 12 2006,17:01:16)
;
_computing_cell_refinement
;
        CrysAlis RED, Oxford Diffraction Ltd.,
        Version 1.171.30.5 (release 12-06-2006 CrysAlis171 .NET)
        (compiled Jun 12 2006,17:01:16)
;
_computing_data_reduction
;
        CrysAlis RED, Oxford Diffraction Ltd.,
        Version 1.171.30.5 (release 12-06-2006 CrysAlis171 .NET)
        (compiled Jun 12 2006,17:01:16)
;
_computing_structure_refinement         'SHELXL-97 (Sheldrick, 1997)'
 
#----------------------------------------------------------------------------#
#                   REFINEMENT INFORMATION                                   #
#----------------------------------------------------------------------------#
 
_refine_special_details
;
 Refinement of F^2^ against ALL reflections.  The weighted R-factor wR and
 goodness of fit S are based on F^2^, conventional R-factors R are based
 on F, with F set to zero for negative F^2^. The threshold expression of
 F^2^ > 2sigma(F^2^) is used only for calculating R-factors(gt) etc. and is
 not relevant to the choice of reflections for refinement.  R-factors based
 on F^2^ are statistically about twice as large as those based on F, and R-
 factors based on ALL data will be even larger.
;
_refine_ls_structure_factor_coef        Fsqd
_refine_ls_matrix_type                  full
_refine_ls_weighting_scheme             calc
_refine_ls_weighting_details
         'calc w=1/[\s^2^(Fo^2^)+(0.0233P)^2^+7.6870P] where P=(Fo^2^+2Fc^2^)/3'
_atom_sites_solution_primary            direct
_atom_sites_solution_secondary          difmap
_atom_sites_solution_hydrogens          geom
_refine_ls_hydrogen_treatment           riding
_refine_ls_extinction_method            none
_refine_ls_number_reflns                10706
_refine_ls_number_parameters            308
_refine_ls_number_restraints            0
_refine_ls_R_factor_all                 0.0502
_refine_ls_R_factor_gt                  0.0374
_refine_ls_wR_factor_ref                0.1027
_refine_ls_wR_factor_gt                 0.0995
_refine_ls_goodness_of_fit_ref          1.098
_refine_ls_restrained_S_all             1.098
_refine_ls_shift/su_max                 0.001
_refine_ls_shift/su_mean                0
_refine_diff_density_max                1.63
_refine_diff_density_min                -1.16
_refine_diff_density_rms                0.128
 
#----------------------------------------------------------------------------#
#                   ATOMIC TYPES, COORDINATES AND THERMAL PARAMETERS         #
#----------------------------------------------------------------------------#
 
loop_
    _atom_type_symbol
    _atom_type_description
    _atom_type_scat_dispersion_real
    _atom_type_scat_dispersion_imag
    _atom_type_scat_source
C C 0.0033 0.0016 'International Tables Vol C Tables 4.2.6.8 and 6.1.1.4'
H H 0 0 'International Tables Vol C Tables 4.2.6.8 and 6.1.1.4'
N N 0.0061 0.0033 'International Tables Vol C Tables 4.2.6.8 and 6.1.1.4'
O O 0.0106 0.006 'International Tables Vol C Tables 4.2.6.8 and 6.1.1.4'
Cl Cl 0.1484 0.1585 'International Tables Vol C Tables 4.2.6.8 and 6.1.1.4'
Rh Rh -1.1178 0.9187 'International Tables Vol C Tables 4.2.6.8 and 6.1.1.4'
 
loop_
    _atom_site_label
    _atom_site_type_symbol
    _atom_site_fract_x
    _atom_site_fract_y
    _atom_site_fract_z
    _atom_site_U_iso_or_equiv
    _atom_site_adp_type
    _atom_site_occupancy
    _atom_site_symmetry_multiplicity
    _atom_site_calc_flag
    _atom_site_refinement_flags
    _atom_site_disorder_assembly
    _atom_site_disorder_group
Rh1 Rh 0.499812(11) 0.29655(2) 0.223499(9) 0.01321(4) Uani 1 1 d . . .
Cl1 Cl 0.49896(4) 0.09148(7) 0.13132(3) 0.01853(10) Uani 1 1 d . . .
N11 N 0.42237(12) 0.5704(2) 0.13313(11) 0.0159(3) Uani 1 1 d . . .
N12 N 0.40618(12) 0.4205(2) 0.16164(11) 0.0156(3) Uani 1 1 d . . .
C13 C 0.32953(14) 0.3781(3) 0.13640(13) 0.0168(4) Uani 1 1 d . . .
C131 C 0.28912(16) 0.2202(3) 0.15386(14) 0.0212(4) Uani 1 1 d . . .
H13A H 0.3319 0.147 0.1739 0.032 Uiso 1 1 calc R . .
H13B H 0.2649 0.1732 0.1099 0.032 Uiso 1 1 calc R . .
H13C H 0.244 0.2367 0.1893 0.032 Uiso 1 1 calc R . .
C14 C 0.29648(15) 0.5031(3) 0.09292(14) 0.0192(4) Uani 1 1 d . . .
H14 H 0.2428 0.5045 0.0695 0.023 Uiso 1 1 calc R . .
C15 C 0.35652(15) 0.6216(3) 0.09094(13) 0.0179(4) Uani 1 1 d . . .
C151 C 0.35780(18) 0.7795(3) 0.05183(15) 0.0247(5) Uani 1 1 d . . .
H15A H 0.3666 0.867 0.0865 0.037 Uiso 1 1 calc R . .
H15B H 0.3036 0.7952 0.0267 0.037 Uiso 1 1 calc R . .
H15C H 0.4041 0.7795 0.0167 0.037 Uiso 1 1 calc R . .
C23 C 0.66732(14) 0.3810(3) 0.13488(13) 0.0168(4) Uani 1 1 d . . .
C231 C 0.70913(16) 0.2235(3) 0.15168(15) 0.0218(5) Uani 1 1 d . . .
H23A H 0.7498 0.2382 0.1913 0.033 Uiso 1 1 calc R . .
H23B H 0.739 0.1845 0.1089 0.033 Uiso 1 1 calc R . .
H23C H 0.666 0.1448 0.1659 0.033 Uiso 1 1 calc R . .
N21 N 0.57391(12) 0.5711(2) 0.13242(11) 0.0163(3) Uani 1 1 d . . .
N22 N 0.59109(12) 0.4222(2) 0.16119(11) 0.0156(3) Uani 1 1 d . . .
C24 C 0.69844(15) 0.5045(3) 0.09074(13) 0.0191(4) Uani 1 1 d . . .
H24 H 0.7514 0.5058 0.0665 0.023 Uiso 1 1 calc R . .
C25 C 0.63759(15) 0.6238(3) 0.08930(13) 0.0178(4) Uani 1 1 d . . .
C251 C 0.63338(18) 0.7808(3) 0.04938(15) 0.0242(5) Uani 1 1 d . . .
H25A H 0.5906 0.7735 0.011 0.036 Uiso 1 1 calc R . .
H25B H 0.6889 0.8043 0.0282 0.036 Uiso 1 1 calc R . .
H25C H 0.6179 0.8671 0.0829 0.036 Uiso 1 1 calc R . .
C10 C 0.49812(14) 0.6541(3) 0.15512(13) 0.0155(4) Uani 1 1 d . . .
H10A H 0.4987 0.6647 0.2083 0.019 Uiso 1 1 calc R . .
H10B H 0.4977 0.7638 0.1342 0.019 Uiso 1 1 calc R . .
C101 C 0.54750(15) 0.1416(3) 0.30818(13) 0.0170(4) Uani 1 1 d . . .
C102 C 0.57430(15) 0.3027(3) 0.32249(12) 0.0182(4) Uani 1 1 d . . .
C103 C 0.50024(17) 0.4027(3) 0.32948(13) 0.0188(4) Uani 1 1 d . . .
C104 C 0.42667(15) 0.2999(3) 0.32260(12) 0.0176(4) Uani 1 1 d . . .
C105 C 0.45486(15) 0.1401(3) 0.30860(13) 0.0172(4) Uani 1 1 d . . .
C106 C 0.60126(17) -0.0055(3) 0.30164(15) 0.0232(5) Uani 1 1 d . . .
H10C H 0.6603 0.0262 0.2936 0.035 Uiso 1 1 calc R . .
H10D H 0.5812 -0.0706 0.2609 0.035 Uiso 1 1 calc R . .
H10E H 0.5975 -0.0687 0.3461 0.035 Uiso 1 1 calc R . .
C107 C 0.66385(18) 0.3609(4) 0.32975(16) 0.0258(5) Uani 1 1 d . . .
H10F H 0.7029 0.2738 0.317 0.039 Uiso 1 1 calc R . .
H10G H 0.6745 0.3944 0.3796 0.039 Uiso 1 1 calc R . .
H10H H 0.6728 0.4525 0.2974 0.039 Uiso 1 1 calc R . .
C108 C 0.4995(2) 0.5747(3) 0.35254(16) 0.0295(6) Uani 1 1 d . . .
H10I H 0.5019 0.5806 0.4053 0.044 Uiso 1 1 calc R . .
H10J H 0.4474 0.6264 0.3353 0.044 Uiso 1 1 calc R . .
H10K H 0.5488 0.6303 0.3322 0.044 Uiso 1 1 calc R . .
C109 C 0.33708(18) 0.3566(3) 0.32938(15) 0.0250(5) Uani 1 1 d . . .
H10L H 0.2984 0.2714 0.3133 0.037 Uiso 1 1 calc R . .
H10M H 0.3287 0.4526 0.2995 0.037 Uiso 1 1 calc R . .
H10N H 0.3254 0.383 0.3798 0.037 Uiso 1 1 calc R . .
C100 C 0.40220(17) -0.0083(3) 0.30257(15) 0.0226(5) Uani 1 1 d . . .
H10O H 0.4057 -0.0692 0.3477 0.034 Uiso 1 1 calc R . .
H10P H 0.4232 -0.0749 0.2629 0.034 Uiso 1 1 calc R . .
H10Q H 0.343 0.0216 0.2931 0.034 Uiso 1 1 calc R . .
O1 O 0.18267(17) 0.0559(4) 0.00860(16) 0.0281(6) Uani 0.761(4) 1 d P . .
O1' O 0.1798(7) -0.0528(13) -0.0070(6) 0.040(3) Uani 0.239(4) 1 d P . .
O2 O 0.5792(3) 0.1782(5) 0.4987(3) 0.0632(15) Uani 0.761(4) 1 d P . .
Cl2 Cl 0.6176(3) 0.1954(4) 0.5075(2) 0.0338(10) Uani 0.239(4) 1 d P . .
Cl3 Cl 0.88187(6) 0.30579(12) 0.00808(5) 0.0224(3) Uani 0.761(4) 1 d P . .
O3 O 0.9206(11) 0.3221(15) -0.0015(11) 0.071(5) Uani 0.239(4) 1 d P . .
 
loop_
    _atom_site_aniso_label
    _atom_site_aniso_U_11
    _atom_site_aniso_U_22
    _atom_site_aniso_U_33
    _atom_site_aniso_U_23
    _atom_site_aniso_U_13
    _atom_site_aniso_U_12
Rh1 0.01426(7) 0.00991(6) 0.01545(7) -0.00028(6) -0.00055(5) -0.00014(6)
Cl1 0.0213(2) 0.0133(2) 0.0210(2) -0.00402(19) -0.00067(19) 0.00023(19)
N11 0.0151(8) 0.0121(8) 0.0204(9) 0.0016(7) -0.0021(7) -0.0001(6)
N12 0.0161(8) 0.0126(8) 0.0182(9) 0.0011(7) -0.0001(6) 0.0001(6)
C13 0.0148(9) 0.0156(9) 0.0200(10) -0.0003(8) -0.0008(7) -0.0014(7)
C131 0.0193(10) 0.0185(11) 0.0257(11) -0.0005(9) -0.0010(8) -0.0034(8)
C14 0.0179(10) 0.0190(10) 0.0208(11) 0.0000(8) -0.0027(8) -0.0001(8)
C15 0.0179(9) 0.0160(10) 0.0199(10) 0.0007(8) -0.0024(8) 0.0026(8)
C151 0.0294(12) 0.0193(11) 0.0255(12) 0.0059(9) -0.0033(10) 0.0018(10)
C23 0.0144(9) 0.0155(9) 0.0205(10) 0.0005(8) 0.0001(7) 0.0019(7)
C231 0.0193(10) 0.0186(11) 0.0276(12) 0.0019(9) 0.0015(9) 0.0049(8)
N21 0.0162(8) 0.0127(8) 0.0200(9) 0.0016(7) 0.0015(7) 0.0002(6)
N22 0.0147(8) 0.0131(8) 0.0189(9) 0.0020(7) -0.0001(6) 0.0013(6)
C24 0.0178(9) 0.0193(10) 0.0200(10) 0.0007(8) 0.0026(8) 0.0006(8)
C25 0.0180(9) 0.0167(10) 0.0186(10) 0.0012(8) 0.0012(8) -0.0014(8)
C251 0.0272(12) 0.0185(11) 0.0271(12) 0.0051(9) 0.0059(9) -0.0023(9)
C10 0.0139(9) 0.0123(8) 0.0205(10) -0.0010(8) -0.0001(7) 0.0004(7)
C101 0.0188(10) 0.0151(9) 0.0171(10) 0.0025(8) -0.0009(8) -0.0005(8)
C102 0.0228(10) 0.0170(9) 0.0147(9) 0.0014(8) -0.0045(7) -0.0024(9)
C103 0.0282(11) 0.0116(9) 0.0166(10) -0.0019(8) -0.0007(8) -0.0005(8)
C104 0.0222(10) 0.0158(9) 0.0148(9) 0.0006(8) 0.0020(7) 0.0014(9)
C105 0.0191(10) 0.0154(9) 0.0171(10) 0.0018(8) 0.0004(8) 0.0014(8)
C106 0.0235(11) 0.0182(10) 0.0278(12) 0.0043(9) -0.0028(9) 0.0041(9)
C107 0.0253(12) 0.0264(13) 0.0258(12) 0.0002(10) -0.0081(10) -0.0069(10)
C108 0.0492(17) 0.0155(11) 0.0238(12) -0.0063(9) -0.0011(12) -0.0018(11)
C109 0.0265(12) 0.0235(12) 0.0250(12) -0.0010(10) 0.0062(10) 0.0057(10)
C100 0.0234(11) 0.0169(10) 0.0275(12) 0.0037(9) 0.0030(9) -0.0024(9)
O1 0.0236(12) 0.0277(15) 0.0330(14) 0.0064(11) -0.0024(10) -0.0030(10)
O1' 0.042(6) 0.025(5) 0.051(6) 0.009(4) -0.007(5) -0.009(4)
O2 0.0198(17) 0.0273(18) 0.143(5) -0.015(2) 0.008(2) -0.0052(14)
Cl2 0.0294(19) 0.0220(14) 0.050(2) 0.0029(13) 0.0039(14) 0.0016(13)
Cl3 0.0187(4) 0.0217(4) 0.0268(4) -0.0022(3) -0.0028(3) 0.0007(3)
O3 0.040(8) 0.027(6) 0.145(17) 0.018(7) 0.009(9) -0.008(6)
 
 
#----------------------------------------------------------------------------#
#                   MOLECULAR GEOMETRY                                       #
#----------------------------------------------------------------------------#
 
_geom_special_details
;
 All esds (except the esd in the dihedral angle between two l.s. planes)
 are estimated using the full covariance matrix.  The cell esds are taken
 into account individually in the estimation of esds in distances, angles
 and torsion angles; correlations between esds in cell parameters are only
 used when they are defined by crystal symmetry.  An approximate (isotropic)
 treatment of cell esds is used for estimating esds involving l.s. planes.
;
loop_
    _geom_bond_atom_site_label_1
    _geom_bond_atom_site_label_2
    _geom_bond_distance
    _geom_bond_site_symmetry_2
    _geom_bond_publ_flag
Rh1 N22 2.124(2) . ?
Rh1 N12 2.131(2) . ?
Rh1 C103 2.155(2) . ?
Rh1 C101 2.163(2) . ?
Rh1 C105 2.166(2) . ?
Rh1 C104 2.175(2) . ?
Rh1 C102 2.176(2) . ?
Rh1 Cl1 2.4136(6) . ?
N11 C15 1.365(3) . ?
N11 N12 1.377(3) . ?
N11 C10 1.439(3) . ?
N12 C13 1.341(3) . ?
C13 C14 1.413(3) . ?
C13 C131 1.494(3) . ?
C131 H13A 0.98 . ?
C131 H13B 0.98 . ?
C131 H13C 0.98 . ?
C14 C15 1.366(3) . ?
C14 H14 0.95 . ?
C15 C151 1.499(4) . ?
C151 H15A 0.98 . ?
C151 H15B 0.98 . ?
C151 H15C 0.98 . ?
C23 N22 1.344(3) . ?
C23 C24 1.403(3) . ?
C23 C231 1.497(3) . ?
C231 H23A 0.98 . ?
C231 H23B 0.98 . ?
C231 H23C 0.98 . ?
N21 C25 1.359(3) . ?
N21 N22 1.374(3) . ?
N21 C10 1.444(3) . ?
C24 C25 1.379(3) . ?
C24 H24 0.95 . ?
C25 C251 1.501(4) . ?
C251 H25A 0.98 . ?
C251 H25B 0.98 . ?
C251 H25C 0.98 . ?
C10 H10A 0.99 . ?
C10 H10B 0.99 . ?
C101 C102 1.427(3) . ?
C101 C105 1.461(3) . ?
C101 C106 1.492(3) . ?
C102 C103 1.439(4) . ?
C102 C107 1.498(4) . ?
C103 C104 1.445(3) . ?
C103 C108 1.491(3) . ?
C104 C105 1.424(3) . ?
C104 C109 1.495(4) . ?
C105 C100 1.490(4) . ?
C106 H10C 0.98 . ?
C106 H10D 0.98 . ?
C106 H10E 0.98 . ?
C107 H10F 0.98 . ?
C107 H10G 0.98 . ?
C107 H10H 0.98 . ?
C108 H10I 0.98 . ?
C108 H10J 0.98 . ?
C108 H10K 0.98 . ?
C109 H10L 0.98 . ?
C109 H10M 0.98 . ?
C109 H10N 0.98 . ?
C100 H10O 0.98 . ?
C100 H10P 0.98 . ?
C100 H10Q 0.98 . ?

 
loop_
    _geom_angle_atom_site_label_1
    _geom_angle_atom_site_label_2
    _geom_angle_atom_site_label_3
    _geom_angle
    _geom_angle_site_symmetry_1
    _geom_angle_site_symmetry_3
    _geom_angle_publ_flag
N22 Rh1 N12 86.49(7) . . ?
N22 Rh1 C103 107.24(9) . . ?
N12 Rh1 C103 107.05(9) . . ?
N22 Rh1 C101 116.97(8) . . ?
N12 Rh1 C101 156.39(8) . . ?
C103 Rh1 C101 65.23(9) . . ?
N22 Rh1 C105 156.35(8) . . ?
N12 Rh1 C105 117.01(8) . . ?
C103 Rh1 C105 65.16(9) . . ?
C101 Rh1 C105 39.43(9) . . ?
N22 Rh1 C104 144.78(9) . . ?
N12 Rh1 C104 94.62(8) . . ?
C103 Rh1 C104 38.99(9) . . ?
C101 Rh1 C104 65.01(9) . . ?
C105 Rh1 C104 38.29(9) . . ?
N22 Rh1 C102 94.79(8) . . ?
N12 Rh1 C102 144.40(9) . . ?
C103 Rh1 C102 38.81(9) . . ?
C101 Rh1 C102 38.41(9) . . ?
C105 Rh1 C102 64.91(9) . . ?
C104 Rh1 C102 64.68(9) . . ?
N22 Rh1 Cl1 87.86(6) . . ?
N12 Rh1 Cl1 87.57(6) . . ?
C103 Rh1 Cl1 159.27(7) . . ?
C101 Rh1 Cl1 95.49(7) . . ?
C105 Rh1 Cl1 95.31(7) . . ?
C104 Rh1 Cl1 127.36(7) . . ?
C102 Rh1 Cl1 128.01(7) . . ?
C15 N11 N12 111.11(19) . . ?
C15 N11 C10 129.8(2) . . ?
N12 N11 C10 118.86(19) . . ?
C13 N12 N11 105.76(19) . . ?
C13 N12 Rh1 133.01(16) . . ?
N11 N12 Rh1 120.97(14) . . ?
N12 C13 C14 109.6(2) . . ?
N12 C13 C131 122.6(2) . . ?
C14 C13 C131 127.8(2) . . ?
C13 C131 H13A 109.5 . . ?
C13 C131 H13B 109.5 . . ?
H13A C131 H13B 109.5 . . ?
C13 C131 H13C 109.5 . . ?
H13A C131 H13C 109.5 . . ?
H13B C131 H13C 109.5 . . ?
C15 C14 C13 106.9(2) . . ?
C15 C14 H14 126.5 . . ?
C13 C14 H14 126.5 . . ?
N11 C15 C14 106.6(2) . . ?
N11 C15 C151 122.6(2) . . ?
C14 C15 C151 130.9(2) . . ?
C15 C151 H15A 109.5 . . ?
C15 C151 H15B 109.5 . . ?
H15A C151 H15B 109.5 . . ?
C15 C151 H15C 109.5 . . ?
H15A C151 H15C 109.5 . . ?
H15B C151 H15C 109.5 . . ?
N22 C23 C24 110.0(2) . . ?
N22 C23 C231 122.7(2) . . ?
C24 C23 C231 127.3(2) . . ?
C23 C231 H23A 109.5 . . ?
C23 C231 H23B 109.5 . . ?
H23A C231 H23B 109.5 . . ?
C23 C231 H23C 109.5 . . ?
H23A C231 H23C 109.5 . . ?
H23B C231 H23C 109.5 . . ?
C25 N21 N22 111.96(19) . . ?
C25 N21 C10 129.2(2) . . ?
N22 N21 C10 118.58(19) . . ?
C23 N22 N21 105.27(19) . . ?
C23 N22 Rh1 133.00(16) . . ?
N21 N22 Rh1 121.40(14) . . ?
C25 C24 C23 107.0(2) . . ?
C25 C24 H24 126.5 . . ?
C23 C24 H24 126.5 . . ?
N21 C25 C24 105.8(2) . . ?
N21 C25 C251 122.6(2) . . ?
C24 C25 C251 131.5(2) . . ?
C25 C251 H25A 109.5 . . ?
C25 C251 H25B 109.5 . . ?
H25A C251 H25B 109.5 . . ?
C25 C251 H25C 109.5 . . ?
H25A C251 H25C 109.5 . . ?
H25B C251 H25C 109.5 . . ?
N11 C10 N21 111.94(19) . . ?
N11 C10 H10A 109.2 . . ?
N21 C10 H10A 109.2 . . ?
N11 C10 H10B 109.2 . . ?
N21 C10 H10B 109.2 . . ?
H10A C10 H10B 107.9 . . ?
C102 C101 C105 107.6(2) . . ?
C102 C101 C106 127.9(2) . . ?
C105 C101 C106 124.2(2) . . ?
C102 C101 Rh1 71.29(13) . . ?
C105 C101 Rh1 70.41(13) . . ?
C106 C101 Rh1 128.58(18) . . ?
C101 C102 C103 108.6(2) . . ?
C101 C102 C107 126.7(2) . . ?
C103 C102 C107 124.8(2) . . ?
C101 C102 Rh1 70.31(13) . . ?
C103 C102 Rh1 69.80(13) . . ?
C107 C102 Rh1 126.03(18) . . ?
C102 C103 C104 107.6(2) . . ?
C102 C103 C108 125.9(2) . . ?
C104 C103 C108 125.7(2) . . ?
C102 C103 Rh1 71.39(13) . . ?
C104 C103 Rh1 71.25(13) . . ?
C108 C103 Rh1 130.82(18) . . ?
C105 C104 C103 108.4(2) . . ?
C105 C104 C109 127.2(2) . . ?
C103 C104 C109 124.4(2) . . ?
C105 C104 Rh1 70.53(13) . . ?
C103 C104 Rh1 69.75(13) . . ?
C109 C104 Rh1 125.46(17) . . ?
C104 C105 C101 107.8(2) . . ?
C104 C105 C100 127.6(2) . . ?
C101 C105 C100 124.3(2) . . ?
C104 C105 Rh1 71.18(13) . . ?
C101 C105 Rh1 70.16(13) . . ?
C100 C105 Rh1 128.70(18) . . ?
C101 C106 H10C 109.5 . . ?
C101 C106 H10D 109.5 . . ?
H10C C106 H10D 109.5 . . ?
C101 C106 H10E 109.5 . . ?
H10C C106 H10E 109.5 . . ?
H10D C106 H10E 109.5 . . ?
C102 C107 H10F 109.5 . . ?
C102 C107 H10G 109.5 . . ?
H10F C107 H10G 109.5 . . ?
C102 C107 H10H 109.5 . . ?
H10F C107 H10H 109.5 . . ?
H10G C107 H10H 109.5 . . ?
C103 C108 H10I 109.5 . . ?
C103 C108 H10J 109.5 . . ?
H10I C108 H10J 109.5 . . ?
C103 C108 H10K 109.5 . . ?
H10I C108 H10K 109.5 . . ?
H10J C108 H10K 109.5 . . ?
C104 C109 H10L 109.5 . . ?
C104 C109 H10M 109.5 . . ?
H10L C109 H10M 109.5 . . ?
C104 C109 H10N 109.5 . . ?
H10L C109 H10N 109.5 . . ?
H10M C109 H10N 109.5 . . ?
C105 C100 H10O 109.5 . . ?
C105 C100 H10P 109.5 . . ?
H10O C100 H10P 109.5 . . ?
C105 C100 H10Q 109.5 . . ?
H10O C100 H10Q 109.5 . . ?
H10P C100 H10Q 109.5 . . ?
#===END 
data_global
 

_audit_creation_date                   06-08-31
_audit_update_record                   ?
 
#==============================================================================
#   (Publishing Staff Use Only)
 
_journal_date_recd_electronic          ?
_journal_date_to_coeditor              ?
_journal_date_from_coeditor            ?
_journal_date_accepted                 ?
_journal_date_printers_first           ?
_journal_date_printers_final           ?
_journal_date_proofs_out               ?
_journal_date_proofs_in                ?
_journal_coeditor_name                 ?
_journal_coeditor_code                 ?
_journal_coeditor_notes
; ?
;
_journal_techeditor_code               ?
_journal_techeditor_notes
; ?
;
_journal_coden_ASTM                    ?
_journal_name_full                     ?
_journal_year                          ?
_journal_volume                        ?
_journal_issue                         ?
_journal_page_first                    ?
_journal_page_last                     ?
_journal_suppl_publ_number             ?
_journal_suppl_publ_pages              ?
 
#=======================================================================
 
# 1. SUBMISSION DETAILS
#----------------------
 
_publ_contact_author_name
     'Skelton, B. W.'
_publ_contact_author_address
;
   Department of Chemistry
   University of Western Australia
   35 Stirling Highway
   Crawley
   Western Australia 6009
   Australia
;
_publ_contact_author_email            bws@crystal.uwa.edu.au
_publ_contact_author_fax               (+61)_08_6488_1118
_publ_contact_author_phone             (+61)_08_6488_7107
 

 
loop_
_publ_author_name
_publ_author_footnote
_publ_author_address
 
 
'Skelton, Brian W.' .
; Department of Chemistry,
University of Western Australia,
35 Stirling Highway,
Crawley,
WA 6009,
Australia.
;
 
 

 
data_cprhl2
 
_audit_creation_date                    2006-09-06T11:43:05-00:00
_audit_creation_method                  'WinGX routine CIF_UPDATE'
 
#----------------------------------------------------------------------------#
#                   CHEMICAL INFORMATION                                     #
#----------------------------------------------------------------------------#
 
_chemical_name_systematic
;
 ?
;
_chemical_formula_sum                   'C21.50 H32 Cl3 N4 Rh'
_chemical_formula_moiety       'C21 H31 Cl N4 Rh, Cl, 1/2(C H2 Cl2)'
_chemical_formula_weight                555.77
 
#----------------------------------------------------------------------------#
#                   UNIT CELL INFORMATION                                    #
#----------------------------------------------------------------------------#
_symmetry_cell_setting                 triclinic
_symmetry_space_group_name_H-M         P_-1
_symmetry_space_group_name_Hall        -p_1
 
loop_
    _symmetry_equiv_pos_as_xyz
'x, y, z'
'-x, -y, -z'
 
_cell_length_a                          12.602(4)
_cell_length_b                          13.993(5)
_cell_length_c                          17.467(6)
_cell_angle_alpha                       74.662(5)
_cell_angle_beta                        82.048(5)
_cell_angle_gamma                       63.242(5)
_cell_volume                            2651.7(16)
_cell_formula_units_Z                   4
_cell_measurement_temperature           150(2)
_cell_measurement_reflns_used          4068
_cell_measurement_theta_min            2.78
_cell_measurement_theta_max            24.72

#----------------------------------------------------------------------------#
#                   CRYSTAL INFORMATION                                      #
#----------------------------------------------------------------------------#
 
_exptl_crystal_density_diffrn           1.392
_exptl_crystal_density_method           'not measured'
_exptl_crystal_F_000                    1140
_exptl_special_details
;
 ?
;


#----------------------------------------------------------------------------#
#                   ABSORPTION CORRECTION                                    #
#----------------------------------------------------------------------------#
 
_exptl_absorpt_coefficient_mu          .909
_exptl_crystal_description             plate
_exptl_crystal_size_max                .28
_exptl_crystal_size_mid                .17
_exptl_crystal_size_min                .06
_exptl_crystal_size_rad                ?
_exptl_crystal_colour                  yellow
 
_diffrn_measurement_device_type
;
Bruker SMART CCD diffractometer
;
_diffrn_measurement_method             '\w scans'
_diffrn_detector_area_resol_mean       ?
 
_exptl_absorpt_correction_type         multi-scan
_exptl_absorpt_process_details
;
 SADABS; Sheldrick, 1996
;
_exptl_absorpt_correction_T_min        .57
_exptl_absorpt_correction_T_max        1

 
#----------------------------------------------------------------------------#
#                   DATA COLLECTION                                          #
#----------------------------------------------------------------------------#
 
_diffrn_ambient_temperature             150(2)
_diffrn_radiation_wavelength            0.71073
_diffrn_radiation_type                  MoK\a
_diffrn_radiation_monochromator         graphite
_diffrn_reflns_av_R_equivalents         0.075
_diffrn_reflns_av_unetI/netI            0.1821
_diffrn_reflns_number                   22725
_diffrn_reflns_limit_h_min              -14
_diffrn_reflns_limit_h_max              14
_diffrn_reflns_limit_k_min              -15
_diffrn_reflns_limit_k_max              16
_diffrn_reflns_limit_l_min              -20
_diffrn_reflns_limit_l_max              20
_diffrn_reflns_theta_min                1.67
_diffrn_reflns_theta_max                25
_diffrn_reflns_theta_full               25
_diffrn_measured_fraction_theta_full
                                        0.979
_diffrn_measured_fraction_theta_max
                                        0.979
_reflns_number_total                    9135
_reflns_number_gt                       5235
_reflns_threshold_expression            I>2sigma(I)
 
#----------------------------------------------------------------------------#
#                   COMPUTER PROGRAMS USED                                   #
#----------------------------------------------------------------------------#
_computing_data_collection             'Siemens SMART (Siemens, 1995)'
_computing_cell_refinement             'Siemens SAINT (Siemens, 1995)'
_computing_data_reduction              'Siemens SAINT'
_computing_structure_solution          xtal
_computing_molecular_graphics          xtal
_computing_publication_material       'WinGX'
 
_computing_structure_refinement         'SHELXL-97 (Sheldrick, 1997)'
 
#----------------------------------------------------------------------------#
#                   REFINEMENT INFORMATION                                   #
#----------------------------------------------------------------------------#
 
_refine_special_details
;
 Refinement of F^2^ against ALL reflections.  The weighted R-factor wR and
 goodness of fit S are based on F^2^, conventional R-factors R are based
 on F, with F set to zero for negative F^2^. The threshold expression of
 F^2^ > 2sigma(F^2^) is used only for calculating R-factors(gt) etc. and is
 not relevant to the choice of reflections for refinement.  R-factors based
 on F^2^ are statistically about twice as large as those based on F, and R-
 factors based on ALL data will be even larger.
;
_refine_ls_structure_factor_coef        Fsqd
_refine_ls_matrix_type                  full
_refine_ls_weighting_scheme             calc
_refine_ls_weighting_details
         'calc w=1/[\s^2^(Fo^2^)+(0.1521P)^2^] where P=(Fo^2^+2Fc^2^)/3'
_atom_sites_solution_primary            direct
_atom_sites_solution_secondary          difmap
_atom_sites_solution_hydrogens          geom
_refine_ls_hydrogen_treatment           constr
_refine_ls_extinction_method            none
_refine_ls_number_reflns                9135
_refine_ls_number_parameters            566
_refine_ls_number_restraints            7
_refine_ls_R_factor_all                 0.1778
_refine_ls_R_factor_gt                  0.1042
_refine_ls_wR_factor_ref                0.2955
_refine_ls_wR_factor_gt                 0.2699
_refine_ls_goodness_of_fit_ref          1.068
_refine_ls_restrained_S_all             1.068
_refine_ls_shift/su_max                 0.047
_refine_ls_shift/su_mean                0.006
_refine_diff_density_max                2.473
_refine_diff_density_min                -1.768
_refine_diff_density_rms                0.202
 
#----------------------------------------------------------------------------#
#                   ATOMIC TYPES, COORDINATES AND THERMAL PARAMETERS         #
#----------------------------------------------------------------------------#
 
loop_
    _atom_type_symbol
    _atom_type_description
    _atom_type_scat_dispersion_real
    _atom_type_scat_dispersion_imag
    _atom_type_scat_source
C C 0.0033 0.0016 'International Tables Vol C Tables 4.2.6.8 and 6.1.1.4'
H H 0 0 'International Tables Vol C Tables 4.2.6.8 and 6.1.1.4'
Cl Cl 0.1484 0.1585 'International Tables Vol C Tables 4.2.6.8 and 6.1.1.4'
N N 0.0061 0.0033 'International Tables Vol C Tables 4.2.6.8 and 6.1.1.4'
Rh Rh -1.1178 0.9187 'International Tables Vol C Tables 4.2.6.8 and 6.1.1.4'
 
loop_
    _atom_site_label
    _atom_site_type_symbol
    _atom_site_fract_x
    _atom_site_fract_y
    _atom_site_fract_z
    _atom_site_U_iso_or_equiv
    _atom_site_adp_type
    _atom_site_occupancy
    _atom_site_symmetry_multiplicity
    _atom_site_calc_flag
    _atom_site_refinement_flags
    _atom_site_disorder_assembly
    _atom_site_disorder_group
Rh1 Rh 0.19618(5) 0.20846(5) 0.39889(4) 0.02276(17) Uani 1 1 d . . .
Rh2 Rh 0.51045(5) 0.66302(5) 0.25001(4) 0.02939(19) Uani 1 1 d . . .
Cl1 Cl 0.01245(16) 0.26765(16) 0.48029(13) 0.0328(6) Uani 1 1 d . . .
Cl2 Cl 0.54454(17) 0.71239(16) 0.36757(13) 0.0338(6) Uani 1 1 d . . .
N111 N 0.1398(5) 0.4375(5) 0.2912(4) 0.0257(18) Uani 1 1 d . . .
N112 N 0.1725(5) 0.3788(5) 0.3671(4) 0.0235(17) Uani 1 1 d . . .
C113 C 0.1423(6) 0.4547(6) 0.4127(5) 0.030(2) Uani 1 1 d . . .
C114 C 0.0913(7) 0.5608(6) 0.3628(5) 0.035(2) Uani 1 1 d . . .
H114 H 0.063 0.6281 0.3788 0.042 Uiso 1 1 calc R . .
C115 C 0.0895(7) 0.5502(6) 0.2878(5) 0.031(2) Uani 1 1 d . . .
C116 C 0.1671(7) 0.4200(6) 0.5007(5) 0.033(2) Uani 1 1 d . . .
H11A H 0.1661 0.3483 0.5228 0.05 Uiso 1 1 calc R . .
H11B H 0.1059 0.4746 0.5277 0.05 Uiso 1 1 calc R . .
H11C H 0.2453 0.4146 0.5085 0.05 Uiso 1 1 calc R . .
C117 C 0.0439(7) 0.6381(6) 0.2100(5) 0.035(2) Uani 1 1 d . . .
H11D H 0.1115 0.6369 0.1743 0.052 Uiso 1 1 calc R . .
H11E H 0.0001 0.7109 0.222 0.052 Uiso 1 1 calc R . .
H11F H -0.0089 0.6224 0.1843 0.052 Uiso 1 1 calc R . .
N121 N 0.1008(5) 0.3216(5) 0.2265(4) 0.0233(17) Uani 1 1 d . . .
N122 N 0.0891(5) 0.2513(5) 0.2975(4) 0.0242(17) Uani 1 1 d . . .
C123 C 0.0097(6) 0.2181(6) 0.2808(5) 0.030(2) Uani 1 1 d . . .
C124 C -0.0221(6) 0.2600(6) 0.1999(5) 0.031(2) Uani 1 1 d . . .
H124 H -0.0721 0.2459 0.1729 0.037 Uiso 1 1 calc R . .
C125 C 0.0375(8) 0.3280(7) 0.1683(5) 0.037(3) Uani 1 1 d . . .
C126 C -0.0281(7) 0.1434(7) 0.3433(5) 0.037(2) Uani 1 1 d . . .
H12A H 0.0042 0.0713 0.3304 0.055 Uiso 1 1 calc R . .
H12B H -0.1151 0.1745 0.3461 0.055 Uiso 1 1 calc R . .
H12C H 0.0017 0.1352 0.3947 0.055 Uiso 1 1 calc R . .
C127 C 0.0362(9) 0.3975(8) 0.0820(5) 0.054(3) Uani 1 1 d . . .
H12D H 0.0283 0.4698 0.0839 0.081 Uiso 1 1 calc R . .
H12E H -0.0311 0.4068 0.0538 0.081 Uiso 1 1 calc R . .
H12F H 0.1105 0.3596 0.054 0.081 Uiso 1 1 calc R . .
C10 C 0.1749(7) 0.3818(6) 0.2246(5) 0.028(2) Uani 1 1 d . . .
H10A H 0.26 0.3291 0.2286 0.033 Uiso 1 1 calc R . .
H10B H 0.1639 0.4368 0.1737 0.033 Uiso 1 1 calc R . .
C101 C 0.3766(7) 0.1082(6) 0.3635(5) 0.028(2) Uani 1 1 d . . .
C102 C 0.3820(7) 0.1349(6) 0.4374(5) 0.030(2) Uani 1 1 d . . .
C103 C 0.3131(6) 0.0965(7) 0.4984(5) 0.030(2) Uani 1 1 d . . .
C104 C 0.2678(6) 0.0319(6) 0.4649(5) 0.028(2) Uani 1 1 d . . .
C105 C 0.3103(6) 0.0400(5) 0.3803(5) 0.026(2) Uani 1 1 d . . .
C106 C 0.4477(7) 0.1236(7) 0.2859(5) 0.039(3) Uani 1 1 d . . .
H10C H 0.4783 0.1768 0.286 0.058 Uiso 1 1 calc R . .
H10D H 0.3959 0.1509 0.2405 0.058 Uiso 1 1 calc R . .
H10E H 0.5144 0.053 0.2818 0.058 Uiso 1 1 calc R . .
C107 C 0.4503(7) 0.2009(6) 0.4451(5) 0.036(2) Uani 1 1 d . . .
H10F H 0.4256 0.2264 0.4946 0.054 Uiso 1 1 calc R . .
H10G H 0.4322 0.2644 0.4 0.054 Uiso 1 1 calc R . .
H10H H 0.5359 0.1535 0.4457 0.054 Uiso 1 1 calc R . .
C108 C 0.2923(9) 0.1047(8) 0.5846(5) 0.050(3) Uani 1 1 d . . .
H10I H 0.3382 0.0326 0.6188 0.075 Uiso 1 1 calc R . .
H10J H 0.2075 0.1287 0.5983 0.075 Uiso 1 1 calc R . .
H10K H 0.3178 0.1581 0.5923 0.075 Uiso 1 1 calc R . .
C109 C 0.2003(8) -0.0268(7) 0.5087(6) 0.046(3) Uani 1 1 d . . .
H10L H 0.1719 -0.052 0.4719 0.068 Uiso 1 1 calc R . .
H10M H 0.1321 0.0222 0.5358 0.068 Uiso 1 1 calc R . .
H10N H 0.2511 -0.0904 0.5481 0.068 Uiso 1 1 calc R . .
C100 C 0.2899(8) -0.0110(7) 0.3222(6) 0.045(3) Uani 1 1 d . . .
H10O H 0.2653 0.0431 0.2716 0.068 Uiso 1 1 calc R . .
H10P H 0.2274 -0.0351 0.343 0.068 Uiso 1 1 calc R . .
H10Q H 0.3636 -0.0744 0.3139 0.068 Uiso 1 1 calc R . .
N211 N 0.3874(7) 0.8952(7) 0.1377(4) 0.049(3) Uani 1 1 d . . .
N212 N 0.4919(6) 0.8225(6) 0.1774(4) 0.040(2) Uani 1 1 d . . .
C213 C 0.5618(8) 0.8777(7) 0.1701(5) 0.043(3) Uani 1 1 d . . .
C214 C 0.5002(9) 0.9859(8) 0.1223(6) 0.055(3) Uani 1 1 d . . .
H214 H 0.5274 1.0416 0.1061 0.066 Uiso 1 1 calc R . .
C215 C 0.3919(10) 0.9929(9) 0.1044(7) 0.067(4) Uani 1 1 d . . .
C216 C 0.6859(8) 0.8250(7) 0.2029(6) 0.053(3) Uani 1 1 d . . .
H21A H 0.7023 0.7518 0.2363 0.08 Uiso 1 1 calc R . .
H21B H 0.6914 0.8708 0.2347 0.08 Uiso 1 1 calc R . .
H21C H 0.7442 0.8186 0.1589 0.08 Uiso 1 1 calc R . .
C217 C 0.2839(10) 1.0898(10) 0.0557(7) 0.088(5) Uani 1 1 d . . .
H21D H 0.2796 1.0724 0.0058 0.131 Uiso 1 1 calc R . .
H21E H 0.2943 1.1576 0.0442 0.131 Uiso 1 1 calc R . .
H21F H 0.2101 1.1 0.0868 0.131 Uiso 1 1 calc R . .
N221 N 0.2454(6) 0.8310(6) 0.2121(4) 0.041(2) Uani 1 1 d . . .
N222 N 0.3208(6) 0.7446(6) 0.2716(4) 0.039(2) Uani 1 1 d . . .
C223 C 0.2482(7) 0.7399(6) 0.3347(5) 0.030(2) Uani 1 1 d . . .
C224 C 0.1296(7) 0.8189(7) 0.3171(5) 0.041(3) Uani 1 1 d . . .
H224 H 0.0622 0.83 0.3519 0.049 Uiso 1 1 calc R . .
C225 C 0.1307(7) 0.8763(7) 0.2402(6) 0.044(3) Uani 1 1 d . . .
C226 C 0.2928(7) 0.6559(7) 0.4148(6) 0.044(3) Uani 1 1 d . . .
H22A H 0.3404 0.5822 0.405 0.066 Uiso 1 1 calc R . .
H22B H 0.2244 0.6564 0.4494 0.066 Uiso 1 1 calc R . .
H22C H 0.3416 0.676 0.4405 0.066 Uiso 1 1 calc R . .
C227 C 0.0302(9) 0.9681(9) 0.1864(6) 0.064(4) Uani 1 1 d . . .
H22D H 0.0588 1.0202 0.1526 0.096 Uiso 1 1 calc R . .
H22E H -0.0373 1.0067 0.2194 0.096 Uiso 1 1 calc R . .
H22F H 0.0049 0.936 0.1531 0.096 Uiso 1 1 calc R . .
C20 C 0.2973(9) 0.8572(8) 0.1325(6) 0.052(3) Uani 1 1 d . . .
H20A H 0.3345 0.7909 0.1102 0.063 Uiso 1 1 calc R . .
H20B H 0.2336 0.9152 0.0966 0.063 Uiso 1 1 calc R . .
C201 C 0.5452(7) 0.5631(7) 0.1631(5) 0.037(2) Uani 1 1 d . . .
C202 C 0.6576(7) 0.5644(7) 0.1755(5) 0.041(3) Uani 1 1 d . . .
C203 C 0.6863(7) 0.5188(7) 0.2602(6) 0.042(3) Uani 1 1 d . . .
C204 C 0.5951(8) 0.4856(7) 0.2968(5) 0.040(3) Uani 1 1 d . . .
C205 C 0.5080(8) 0.5078(7) 0.2379(6) 0.042(2) Uani 1 1 d . . .
C206 C 0.4880(8) 0.5990(8) 0.0848(6) 0.051(3) Uani 1 1 d . . .
H20C H 0.4933 0.6666 0.0545 0.076 Uiso 1 1 calc R . .
H20D H 0.4043 0.6129 0.0933 0.076 Uiso 1 1 calc R . .
H20E H 0.5289 0.5412 0.0552 0.076 Uiso 1 1 calc R . .
C207 C 0.7219(7) 0.6143(8) 0.1085(5) 0.044(3) Uani 1 1 d . . .
H20F H 0.7565 0.5669 0.0706 0.067 Uiso 1 1 calc R . .
H20G H 0.7851 0.6207 0.1306 0.067 Uiso 1 1 calc R . .
H20H H 0.6652 0.6874 0.0813 0.067 Uiso 1 1 calc R . .
C208 C 0.7932(7) 0.5026(7) 0.3016(6) 0.047(3) Uani 1 1 d . . .
H20I H 0.7673 0.5266 0.3516 0.071 Uiso 1 1 calc R . .
H20J H 0.832 0.546 0.2673 0.071 Uiso 1 1 calc R . .
H20K H 0.8495 0.4246 0.3126 0.071 Uiso 1 1 calc R . .
C209 C 0.5975(10) 0.4226(8) 0.3855(6) 0.060(4) Uani 1 1 d . . .
H20L H 0.6568 0.346 0.3913 0.09 Uiso 1 1 calc R . .
H20M H 0.519 0.4248 0.4018 0.09 Uiso 1 1 calc R . .
H20N H 0.6184 0.4575 0.4191 0.09 Uiso 1 1 calc R . .
C200 C 0.4033(8) 0.4841(8) 0.2501(7) 0.061(3) Uani 1 1 d . . .
H20O H 0.3837 0.469 0.307 0.092 Uiso 1 1 calc R . .
H20P H 0.421 0.4198 0.2293 0.092 Uiso 1 1 calc R . .
H20Q H 0.3356 0.5477 0.2221 0.092 Uiso 1 1 calc R . .
Cl01 Cl -0.2230(2) 0.4402(3) -0.03737(19) 0.0747(9) Uani 1 1 d . . .
Cl02 Cl -0.6014(10) 0.2905(8) 0.0993(5) 0.144(4) Uani 0.5 1 d P . .
Cl03 Cl -0.3080(4) 0.1944(5) 0.2770(4) 0.072(2) Uani 0.5 1 d P . .
Cl21 Cl -0.3163(4) 0.1192(4) 0.1021(4) 0.0723(19) Uani 0.5 1 d PD A 1
Cl22 Cl -0.3302(10) 0.3139(8) 0.1207(7) 0.330(14) Uani 0.5 1 d PD A 1
C02 C -0.354(2) 0.2128(10) 0.1421(14) 0.16(2) Uiso 0.5 1 d PD A 1
H02A H -0.325 0.1767 0.1969 0.197 Uiso 0.5 1 calc PR A 1
H02B H -0.4414 0.2424 0.1465 0.197 Uiso 0.5 1 calc PR A 1
Cl31 Cl -0.1446(17) -0.0072(10) 0.0372(14) 0.405(14) Uiso 0.5 1 d PD B 2
Cl32 Cl -0.1148(11) 0.1821(9) -0.0282(8) 0.197(6) Uiso 0.5 1 d PD B 2
C03 C -0.161(2) 0.1091(12) 0.033(2) 0.39(3) Uiso 0.5 1 d PD B 2
H03A H -0.2482 0.1535 0.0347 0.468 Uiso 0.5 1 calc PR B 2
H03B H -0.1322 0.1046 0.0843 0.468 Uiso 0.5 1 calc PR B 2
 
loop_
    _atom_site_aniso_label
    _atom_site_aniso_U_11
    _atom_site_aniso_U_22
    _atom_site_aniso_U_33
    _atom_site_aniso_U_23
    _atom_site_aniso_U_13
    _atom_site_aniso_U_12
Rh1 0.0145(3) 0.0187(3) 0.0297(4) -0.0046(2) -0.0009(2) -0.0030(2)
Rh2 0.0214(3) 0.0314(3) 0.0333(4) -0.0117(3) -0.0002(3) -0.0073(2)
Cl1 0.0214(9) 0.0308(9) 0.0417(12) -0.0119(9) 0.0094(9) -0.0084(8)
Cl2 0.0262(9) 0.0365(10) 0.0367(12) -0.0140(9) -0.0025(9) -0.0084(8)
N111 0.016(3) 0.026(3) 0.030(4) -0.009(3) -0.001(3) -0.004(2)
N112 0.015(3) 0.026(3) 0.028(4) -0.009(3) 0.006(3) -0.007(2)
C113 0.019(3) 0.029(4) 0.043(5) -0.012(3) 0.001(3) -0.009(3)
C114 0.034(4) 0.020(4) 0.044(5) -0.006(4) 0.008(4) -0.008(3)
C115 0.033(4) 0.032(4) 0.031(5) 0.002(3) -0.007(4) -0.019(3)
C116 0.039(4) 0.029(4) 0.035(5) -0.009(3) -0.004(4) -0.016(3)
C117 0.035(4) 0.013(3) 0.049(5) 0.000(4) -0.011(4) -0.005(3)
N121 0.024(3) 0.020(3) 0.021(3) -0.005(3) 0.001(3) -0.006(2)
N122 0.018(3) 0.018(3) 0.034(4) 0.002(3) 0.001(3) -0.011(2)
C123 0.010(3) 0.026(4) 0.048(5) -0.007(4) 0.001(3) -0.004(3)
C124 0.016(3) 0.038(4) 0.042(5) -0.008(4) -0.003(3) -0.014(3)
C125 0.045(5) 0.038(4) 0.021(4) -0.011(4) -0.002(4) -0.009(4)
C126 0.023(4) 0.034(4) 0.053(6) -0.013(4) -0.007(4) -0.008(3)
C127 0.053(6) 0.065(6) 0.037(6) -0.012(5) -0.005(5) -0.018(5)
C10 0.024(4) 0.028(4) 0.024(4) -0.001(3) -0.004(3) -0.009(3)
C101 0.022(4) 0.030(4) 0.028(4) -0.007(3) -0.005(3) -0.008(3)
C102 0.020(4) 0.015(3) 0.041(5) -0.002(3) -0.008(4) 0.003(3)
C103 0.011(3) 0.042(4) 0.030(5) -0.010(4) -0.002(3) -0.004(3)
C104 0.020(4) 0.007(3) 0.050(5) 0.000(3) -0.007(4) -0.002(3)
C105 0.010(3) 0.010(3) 0.056(5) -0.008(3) -0.004(3) -0.002(3)
C106 0.024(4) 0.038(5) 0.041(5) -0.005(4) -0.004(4) -0.003(4)
C107 0.024(4) 0.038(4) 0.049(5) -0.022(4) -0.001(4) -0.010(3)
C108 0.049(5) 0.042(5) 0.042(6) 0.011(4) -0.003(5) -0.017(4)
C109 0.052(5) 0.026(4) 0.045(6) 0.006(4) 0.004(5) -0.014(4)
C100 0.033(5) 0.031(4) 0.066(6) -0.020(4) -0.004(5) -0.003(4)
N211 0.036(4) 0.052(5) 0.032(4) -0.004(4) 0.005(4) 0.002(4)
N212 0.037(4) 0.035(4) 0.039(4) -0.005(3) -0.005(3) -0.008(3)
C213 0.044(5) 0.046(4) 0.043(5) -0.024(4) 0.029(4) -0.025(4)
C214 0.052(6) 0.042(5) 0.050(6) 0.008(5) 0.014(5) -0.017(4)
C215 0.051(7) 0.050(6) 0.052(7) 0.009(5) 0.013(6) 0.004(5)
C216 0.052(5) 0.039(5) 0.074(7) -0.010(5) -0.016(5) -0.022(4)
C217 0.058(7) 0.066(8) 0.054(7) 0.016(6) 0.021(6) 0.024(6)
N221 0.037(4) 0.051(4) 0.036(4) -0.019(3) 0.000(3) -0.015(3)
N222 0.041(4) 0.043(4) 0.030(4) -0.011(3) -0.008(3) -0.012(3)
C223 0.027(4) 0.034(4) 0.031(5) -0.012(3) -0.002(4) -0.011(3)
C224 0.036(4) 0.050(4) 0.045(5) -0.023(4) 0.013(4) -0.024(4)
C225 0.014(4) 0.039(4) 0.084(7) -0.037(4) 0.004(4) -0.004(3)
C226 0.030(4) 0.042(5) 0.062(6) -0.014(4) 0.009(4) -0.018(4)
C227 0.046(6) 0.072(7) 0.059(7) -0.029(5) -0.015(5) 0.000(5)
C20 0.050(5) 0.054(5) 0.046(6) -0.020(5) -0.016(5) -0.008(5)
C201 0.033(4) 0.053(4) 0.043(5) -0.028(4) 0.005(4) -0.025(3)
C202 0.020(4) 0.054(5) 0.050(6) -0.027(4) 0.009(4) -0.012(4)
C203 0.024(4) 0.033(4) 0.065(6) -0.023(4) -0.005(4) -0.001(4)
C204 0.038(5) 0.038(4) 0.041(5) -0.017(4) 0.002(4) -0.012(4)
C205 0.041(4) 0.046(4) 0.055(6) -0.029(4) 0.008(4) -0.025(4)
C206 0.039(5) 0.053(5) 0.059(6) -0.024(5) 0.006(5) -0.015(4)
C207 0.029(4) 0.066(5) 0.045(5) -0.025(4) 0.004(4) -0.020(4)
C208 0.023(4) 0.032(4) 0.079(7) -0.025(4) -0.003(5) 0.001(4)
C209 0.079(7) 0.029(5) 0.056(7) -0.004(5) -0.011(6) -0.012(5)
C200 0.035(5) 0.056(5) 0.100(8) -0.041(5) 0.012(5) -0.019(4)
Cl01 0.0546(14) 0.1076(18) 0.084(2) -0.0473(15) 0.0096(14) -0.0432(13)
Cl02 0.189(9) 0.117(6) 0.085(6) 0.022(5) -0.012(6) -0.052(6)
Cl03 0.036(2) 0.107(4) 0.065(4) 0.003(3) -0.012(2) -0.034(3)
Cl21 0.048(2) 0.051(2) 0.134(5) -0.041(3) 0.033(3) -0.034(2)
Cl22 0.154(11) 0.46(3) 0.094(8) -0.048(12) 0.024(7) 0.095(14)
 
 
#----------------------------------------------------------------------------#
#                   MOLECULAR GEOMETRY                                       #
#----------------------------------------------------------------------------#
 
_geom_special_details
;
 All esds (except the esd in the dihedral angle between two l.s. planes)
 are estimated using the full covariance matrix.  The cell esds are taken
 into account individually in the estimation of esds in distances, angles
 and torsion angles; correlations between esds in cell parameters are only
 used when they are defined by crystal symmetry.  An approximate (isotropic)
 treatment of cell esds is used for estimating esds involving l.s. planes.
;
loop_
    _geom_bond_atom_site_label_1
    _geom_bond_atom_site_label_2
    _geom_bond_distance
    _geom_bond_site_symmetry_2
    _geom_bond_publ_flag
Rh1 N122 2.166(7) . ?
Rh1 C101 2.172(7) . ?
Rh1 N112 2.188(6) . ?
Rh1 C103 2.199(7) . ?
Rh1 C102 2.213(8) . ?
Rh1 C105 2.225(7) . ?
Rh1 C104 2.241(7) . ?
Rh1 Cl1 2.460(2) . ?
Rh2 N222 2.163(7) . ?
Rh2 C204 2.180(8) . ?
Rh2 N212 2.181(7) . ?
Rh2 C201 2.200(9) . ?
Rh2 C203 2.215(8) . ?
Rh2 C202 2.240(8) . ?
Rh2 C205 2.251(9) . ?
Rh2 Cl2 2.478(2) . ?
N111 N112 1.368(8) . ?
N111 C115 1.398(10) . ?
N111 C10 1.476(10) . ?
N112 C113 1.381(11) . ?
C113 C114 1.410(10) . ?
C113 C116 1.515(11) . ?
C114 C115 1.361(12) . ?
C115 C117 1.545(10) . ?
N121 C125 1.338(11) . ?
N121 N122 1.400(8) . ?
N121 C10 1.506(11) . ?
N122 C123 1.368(11) . ?
C123 C124 1.416(12) . ?
C123 C126 1.489(12) . ?
C124 C125 1.423(13) . ?
C125 C127 1.560(12) . ?
C101 C102 1.455(12) . ?
C101 C105 1.481(12) . ?
C101 C106 1.539(12) . ?
C102 C103 1.427(12) . ?
C102 C107 1.557(13) . ?
C103 C108 1.518(13) . ?
C103 C104 1.525(13) . ?
C104 C109 1.450(12) . ?
C104 C105 1.493(12) . ?
C105 C100 1.491(13) . ?
N211 C215 1.361(15) . ?
N211 N212 1.387(10) . ?
N211 C20 1.476(14) . ?
N212 C213 1.385(13) . ?
C213 C214 1.430(12) . ?
C213 C216 1.518(13) . ?
C214 C215 1.397(17) . ?
C215 C217 1.570(14) . ?
N221 C225 1.369(11) . ?
N221 N222 1.421(9) . ?
N221 C20 1.480(12) . ?
N222 C223 1.339(11) . ?
C223 C224 1.418(11) . ?
C223 C226 1.552(11) . ?
C224 C225 1.373(13) . ?
C225 C227 1.537(12) . ?
C201 C205 1.465(12) . ?
C201 C202 1.472(12) . ?
C201 C206 1.491(13) . ?
C202 C203 1.473(13) . ?
C202 C207 1.525(13) . ?
C203 C204 1.438(13) . ?
C203 C208 1.515(13) . ?
C204 C205 1.482(13) . ?
C204 C209 1.563(13) . ?
C205 C200 1.475(14) . ?
Cl21 C02 1.504(15) . ?
Cl22 C02 1.515(15) . ?
Cl31 C03 1.528(17) . ?
Cl32 C03 1.519(17) . ?
 
loop_
    _geom_angle_atom_site_label_1
    _geom_angle_atom_site_label_2
    _geom_angle_atom_site_label_3
    _geom_angle
    _geom_angle_site_symmetry_1
    _geom_angle_site_symmetry_3
    _geom_angle_publ_flag
N122 Rh1 C101 105.1(3) . . ?
N122 Rh1 N112 86.9(2) . . ?
C101 Rh1 N112 106.9(3) . . ?
N122 Rh1 C103 155.5(3) . . ?
C101 Rh1 C103 65.6(3) . . ?
N112 Rh1 C103 117.3(3) . . ?
N122 Rh1 C102 142.9(3) . . ?
C101 Rh1 C102 38.8(3) . . ?
N112 Rh1 C102 96.0(3) . . ?
C103 Rh1 C102 37.7(3) . . ?
N122 Rh1 C105 92.3(3) . . ?
C101 Rh1 C105 39.4(3) . . ?
N112 Rh1 C105 144.5(3) . . ?
C103 Rh1 C105 65.9(3) . . ?
C102 Rh1 C105 64.5(3) . . ?
N122 Rh1 C104 115.5(3) . . ?
C101 Rh1 C104 66.1(3) . . ?
N112 Rh1 C104 157.4(3) . . ?
C103 Rh1 C104 40.2(3) . . ?
C102 Rh1 C104 64.8(3) . . ?
C105 Rh1 C104 39.1(3) . . ?
N122 Rh1 Cl1 88.79(17) . . ?
C101 Rh1 Cl1 159.7(2) . . ?
N112 Rh1 Cl1 88.17(16) . . ?
C103 Rh1 Cl1 95.6(2) . . ?
C102 Rh1 Cl1 128.2(2) . . ?
C105 Rh1 Cl1 127.3(2) . . ?
C104 Rh1 Cl1 94.7(2) . . ?
N222 Rh2 C204 116.1(3) . . ?
N222 Rh2 N212 85.7(3) . . ?
C204 Rh2 N212 157.5(3) . . ?
N222 Rh2 C201 109.1(3) . . ?
C204 Rh2 C201 64.6(3) . . ?
N212 Rh2 C201 104.0(3) . . ?
N222 Rh2 C203 154.2(3) . . ?
C204 Rh2 C203 38.2(3) . . ?
N212 Rh2 C203 120.1(3) . . ?
C201 Rh2 C203 65.6(3) . . ?
N222 Rh2 C202 147.0(3) . . ?
C204 Rh2 C202 63.5(3) . . ?
N212 Rh2 C202 95.2(3) . . ?
C201 Rh2 C202 38.7(3) . . ?
C203 Rh2 C202 38.6(3) . . ?
N222 Rh2 C205 94.4(3) . . ?
C204 Rh2 C205 39.0(3) . . ?
N212 Rh2 C205 139.9(3) . . ?
C201 Rh2 C205 38.4(3) . . ?
C203 Rh2 C205 65.3(3) . . ?
C202 Rh2 C205 64.2(3) . . ?
N222 Rh2 Cl2 89.5(2) . . ?
C204 Rh2 Cl2 96.1(3) . . ?
N212 Rh2 Cl2 89.6(2) . . ?
C201 Rh2 Cl2 157.4(2) . . ?
C203 Rh2 Cl2 92.1(3) . . ?
C202 Rh2 Cl2 123.4(2) . . ?
C205 Rh2 Cl2 130.4(2) . . ?
N112 N111 C115 110.2(6) . . ?
N112 N111 C10 120.8(6) . . ?
C115 N111 C10 128.3(6) . . ?
N111 N112 C113 106.6(6) . . ?
N111 N112 Rh1 117.7(5) . . ?
C113 N112 Rh1 131.3(5) . . ?
N112 C113 C114 108.2(7) . . ?
N112 C113 C116 121.9(6) . . ?
C114 C113 C116 129.9(8) . . ?
C115 C114 C113 108.4(8) . . ?
C114 C115 N111 106.6(7) . . ?
C114 C115 C117 130.8(8) . . ?
N111 C115 C117 122.6(7) . . ?
C125 N121 N122 112.2(7) . . ?
C125 N121 C10 128.6(7) . . ?
N122 N121 C10 119.2(6) . . ?
C123 N122 N121 104.3(6) . . ?
C123 N122 Rh1 134.4(5) . . ?
N121 N122 Rh1 121.1(5) . . ?
N122 C123 C124 111.2(7) . . ?
N122 C123 C126 120.4(7) . . ?
C124 C123 C126 128.4(8) . . ?
C123 C124 C125 104.6(8) . . ?
N121 C125 C124 107.6(7) . . ?
N121 C125 C127 123.6(9) . . ?
C124 C125 C127 128.8(9) . . ?
N111 C10 N121 110.3(6) . . ?
C102 C101 C105 107.5(7) . . ?
C102 C101 C106 127.5(8) . . ?
C105 C101 C106 123.8(8) . . ?
C102 C101 Rh1 72.1(4) . . ?
C105 C101 Rh1 72.3(4) . . ?
C106 C101 Rh1 131.0(5) . . ?
C103 C102 C101 110.6(8) . . ?
C103 C102 C107 126.4(8) . . ?
C101 C102 C107 123.0(7) . . ?
C103 C102 Rh1 70.6(4) . . ?
C101 C102 Rh1 69.1(4) . . ?
C107 C102 Rh1 125.1(5) . . ?
C102 C103 C108 129.8(9) . . ?
C102 C103 C104 107.8(7) . . ?
C108 C103 C104 122.2(8) . . ?
C102 C103 Rh1 71.7(4) . . ?
C108 C103 Rh1 126.5(5) . . ?
C104 C103 Rh1 71.4(4) . . ?
C109 C104 C105 128.5(8) . . ?
C109 C104 C103 125.7(8) . . ?
C105 C104 C103 105.7(7) . . ?
C109 C104 Rh1 127.3(5) . . ?
C105 C104 Rh1 69.9(4) . . ?
C103 C104 Rh1 68.4(4) . . ?
C101 C105 C100 125.5(8) . . ?
C101 C105 C104 108.2(7) . . ?
C100 C105 C104 126.3(7) . . ?
C101 C105 Rh1 68.4(4) . . ?
C100 C105 Rh1 126.1(5) . . ?
C104 C105 Rh1 71.0(4) . . ?
C215 N211 N212 109.5(9) . . ?
C215 N211 C20 130.8(8) . . ?
N212 N211 C20 119.6(8) . . ?
C213 N212 N211 107.5(7) . . ?
C213 N212 Rh2 131.4(6) . . ?
N211 N212 Rh2 120.4(6) . . ?
N212 C213 C214 108.0(8) . . ?
N212 C213 C216 123.9(8) . . ?
C214 C213 C216 127.9(9) . . ?
C215 C214 C213 105.9(10) . . ?
N211 C215 C214 109.1(9) . . ?
N211 C215 C217 119.5(12) . . ?
C214 C215 C217 131.4(11) . . ?
C225 N221 N222 111.1(7) . . ?
C225 N221 C20 130.3(7) . . ?
N222 N221 C20 118.7(7) . . ?
C223 N222 N221 104.2(6) . . ?
C223 N222 Rh2 134.8(5) . . ?
N221 N222 Rh2 120.8(5) . . ?
N222 C223 C224 111.1(7) . . ?
N222 C223 C226 122.4(7) . . ?
C224 C223 C226 126.4(7) . . ?
C225 C224 C223 106.8(7) . . ?
N221 C225 C224 106.7(7) . . ?
N221 C225 C227 121.5(9) . . ?
C224 C225 C227 131.7(8) . . ?
N211 C20 N221 110.3(8) . . ?
C205 C201 C202 108.6(7) . . ?
C205 C201 C206 125.9(8) . . ?
C202 C201 C206 125.1(8) . . ?
C205 C201 Rh2 72.7(5) . . ?
C202 C201 Rh2 72.1(5) . . ?
C206 C201 Rh2 127.2(6) . . ?
C203 C202 C201 108.6(8) . . ?
C203 C202 C207 129.3(8) . . ?
C201 C202 C207 122.0(8) . . ?
C203 C202 Rh2 69.8(5) . . ?
C201 C202 Rh2 69.2(5) . . ?
C207 C202 Rh2 123.4(6) . . ?
C204 C203 C202 106.1(8) . . ?
C204 C203 C208 125.6(9) . . ?
C202 C203 C208 128.2(9) . . ?
C204 C203 Rh2 69.6(4) . . ?
C202 C203 Rh2 71.6(4) . . ?
C208 C203 Rh2 126.2(6) . . ?
C203 C204 C205 111.3(8) . . ?
C203 C204 C209 123.2(9) . . ?
C205 C204 C209 125.2(9) . . ?
C203 C204 Rh2 72.2(5) . . ?
C205 C204 Rh2 73.1(5) . . ?
C209 C204 Rh2 127.1(6) . . ?
C201 C205 C200 126.1(9) . . ?
C201 C205 C204 105.2(8) . . ?
C200 C205 C204 128.7(9) . . ?
C201 C205 Rh2 68.9(5) . . ?
C200 C205 Rh2 125.9(6) . . ?
C204 C205 Rh2 67.9(5) . . ?
Cl21 C02 Cl22 131.6(18) . . ?
Cl32 C03 Cl31 130(2) . . ?
#===END 
data_global
 
_audit_creation_date                   06-09-17
_audit_update_record                   ?
 
#==============================================================================
#   (Publishing Staff Use Only)
 
_journal_date_recd_electronic          ?
_journal_date_to_coeditor              ?
_journal_date_from_coeditor            ?
_journal_date_accepted                 ?
_journal_date_printers_first           ?
_journal_date_printers_final           ?
_journal_date_proofs_out               ?
_journal_date_proofs_in                ?
_journal_coeditor_name                 ?
_journal_coeditor_code                 ?
_journal_coeditor_notes
; ?
;
_journal_techeditor_code               ?
_journal_techeditor_notes
; ?
;
_journal_coden_ASTM                    ?
_journal_name_full                     ?
_journal_year                          ?
_journal_volume                        ?
_journal_issue                         ?
_journal_page_first                    ?
_journal_page_last                     ?
_journal_suppl_publ_number             ?
_journal_suppl_publ_pages              ?
 
#=======================================================================
 
# 1. SUBMISSION DETAILS
#----------------------
 
_publ_contact_author_name
     'Skelton, B. W.'
_publ_contact_author_address
;
   Department of Chemistry
   University of Western Australia
   35 Stirling Highway
   Crawley
   Western Australia 6009
   Australia
;
_publ_contact_author_email            bws@crystal.uwa.edu.au
_publ_contact_author_fax               (+61)_08_6488_1118
_publ_contact_author_phone             (+61)_08_6488_7107
 
 
 
loop_
_publ_author_name
_publ_author_footnote
_publ_author_address
 
 
'Skelton, Brian W.' .
;  Chemistry,
University of Western Australia,
35 Stirling Highway,
Crawley,
WA 6009,
Australia.
;

 
data_cpirme
 
_audit_creation_date                    2006-09-17T14:25:42-00:00
_audit_creation_method                  'WinGX routine CIF_UPDATE'
 
#----------------------------------------------------------------------------#
#                   CHEMICAL INFORMATION                                     #
#----------------------------------------------------------------------------#
 
_chemical_name_systematic
;
 ?
;
_chemical_formula_sum                   'C31 H46 Cl4 Ir2 N4'
_chemical_formula_moiety      'C21 H31 Cl Ir N4, C10 H15 Cl3 Ir'
_chemical_formula_weight                1000.92
 
#----------------------------------------------------------------------------#
#                   UNIT CELL INFORMATION                                    #
#----------------------------------------------------------------------------#
 
_symmetry_cell_setting                  monoclinic
_symmetry_space_group_name_H-M          'P 1 21/m 1'
_symmetry_space_group_name_Hall         -P_2yb

loop_
    _symmetry_equiv_pos_as_xyz
'x, y, z'
'-x, y+1/2, -z'
'-x, -y, -z'
'x, -y-1/2, z'
 
_cell_length_a                          9.6379(8)
_cell_length_b                          14.1369(9)
_cell_length_c                          14.047(2)
_cell_angle_alpha                       90
_cell_angle_beta                        110.073(8)
_cell_angle_gamma                       90
_cell_volume                            1797.6(3)
_cell_formula_units_Z                   2
_cell_measurement_temperature           100(2)
_cell_measurement_reflns_used           5014
_cell_measurement_theta_min             2.668
_cell_measurement_theta_max             27.855
 
#----------------------------------------------------------------------------#
#                   CRYSTAL INFORMATION                                      #
#----------------------------------------------------------------------------#
 
_exptl_crystal_description              plate
_exptl_crystal_colour                   orange
_exptl_crystal_size_max                 0.28
_exptl_crystal_size_mid                 0.21
_exptl_crystal_size_min                 0.055
_exptl_crystal_density_diffrn           1.849
_exptl_crystal_density_method           'not measured'
_exptl_crystal_F_000                    964
_exptl_special_details
;
 ?
;
 
#----------------------------------------------------------------------------#
#                   ABSORPTION CORRECTION                                    #
#----------------------------------------------------------------------------#
 
_exptl_absorpt_coefficient_mu           7.718
_exptl_absorpt_correction_type          multi-scan
_exptl_absorpt_process_details
;
        CrysAlis RED, Oxford Diffraction Ltd.,
        Version 1.171.31.5 (release 28-08-2006 CrysAlis171 .NET)
        (compiled Aug 28 2006,13:05:05)
        Empirical absorption correction using spherical harmonics,
 implemented in SCALE3 ABSPACK scaling algorithm.
;
_exptl_absorpt_correction_T_min         0.37422
_exptl_absorpt_correction_T_max         1
 
#----------------------------------------------------------------------------#
#                   DATA COLLECTION                                          #
#----------------------------------------------------------------------------#
 
_diffrn_ambient_temperature             100(2)
_diffrn_radiation_wavelength            0.71073
_diffrn_radiation_type                  MoK\a
_diffrn_radiation_monochromator         graphite
_diffrn_detector_area_resol_mean        16.0009
_diffrn_orient_matrix_ub_11             0.0602890921
_diffrn_orient_matrix_ub_12             -0.0199402957
_diffrn_orient_matrix_ub_13             -0.0111731845
_diffrn_orient_matrix_ub_21             0.0333733001
_diffrn_orient_matrix_ub_22             0.0454107741
_diffrn_orient_matrix_ub_23             0.004586811
_diffrn_orient_matrix_ub_31             0.0376744923
_diffrn_orient_matrix_ub_32             -0.0079908801
_diffrn_orient_matrix_ub_33             0.0523510281
_diffrn_reflns_av_R_equivalents         0.0711
_diffrn_reflns_av_unetI/netI            0.0577
_diffrn_reflns_number                   9406
_diffrn_reflns_limit_h_min              -8
_diffrn_reflns_limit_h_max              11
_diffrn_reflns_limit_k_min              -16
_diffrn_reflns_limit_k_max              16
_diffrn_reflns_limit_l_min              -16
_diffrn_reflns_limit_l_max              16
_diffrn_reflns_theta_min                2.67
_diffrn_reflns_theta_max                25
_diffrn_reflns_theta_full               25
_diffrn_measured_fraction_theta_full
                                        0.983
_diffrn_measured_fraction_theta_max
                                        0.983
_diffrn_measurement_device_type
;
 Oxford Diffraction Xcalibur diffractometer
;
_diffrn_measurement_method              '\w scans'

_reflns_number_total                    3265
_reflns_number_gt                       2635
_reflns_threshold_expression            I>2sigma(I)
 
#----------------------------------------------------------------------------#
#                   COMPUTER PROGRAMS USED                                   #
#----------------------------------------------------------------------------#
 
_computing_data_collection
;
        CrysAlis CCD, Oxford Diffraction Ltd.,
        Version 1.171.31.5 (release 28-08-2006 CrysAlis171 .NET)
        (compiled Aug 28 2006,13:05:05)
;
_computing_cell_refinement
;
        CrysAlis RED, Oxford Diffraction Ltd.,
        Version 1.171.31.5 (release 28-08-2006 CrysAlis171 .NET)
        (compiled Aug 28 2006,13:05:05)
;
_computing_data_reduction
;
        CrysAlis RED, Oxford Diffraction Ltd.,
        Version 1.171.31.5 (release 28-08-2006 CrysAlis171 .NET)
        (compiled Aug 28 2006,13:05:05)
;
_computing_structure_refinement         'SHELXL-97 (Sheldrick, 1997)'
 
#----------------------------------------------------------------------------#
#                   REFINEMENT INFORMATION                                   #
#----------------------------------------------------------------------------#
 
_refine_special_details
;
 Refinement of F^2^ against ALL reflections.  The weighted R-factor wR and
 goodness of fit S are based on F^2^, conventional R-factors R are based
 on F, with F set to zero for negative F^2^. The threshold expression of
 F^2^ > 2sigma(F^2^) is used only for calculating R-factors(gt) etc. and is
 not relevant to the choice of reflections for refinement.  R-factors based
 on F^2^ are statistically about twice as large as those based on F, and R-
 factors based on ALL data will be even larger.
;
_refine_ls_structure_factor_coef        Fsqd
_refine_ls_matrix_type                  full
_refine_ls_weighting_scheme             calc
_refine_ls_weighting_details
        'calc w=1/[\s^2^(Fo^2^)+(0.1091P)^2^+62.0866P] where P=(Fo^2^+2Fc^2^)/3'
_atom_sites_solution_primary            direct
_atom_sites_solution_secondary          difmap
_atom_sites_solution_hydrogens          geom
_refine_ls_hydrogen_treatment           constr
_refine_ls_extinction_method            none
_refine_ls_number_reflns                3265
_refine_ls_number_parameters            163
_refine_ls_number_restraints            14
_refine_ls_R_factor_all                 0.1024
_refine_ls_R_factor_gt                  0.0843
_refine_ls_wR_factor_ref                0.2202
_refine_ls_wR_factor_gt                 0.21
_refine_ls_goodness_of_fit_ref          1.089
_refine_ls_restrained_S_all             1.087
_refine_ls_shift/su_max                 0.02
_refine_ls_shift/su_mean                0.001
_refine_diff_density_max                5.437
_refine_diff_density_min                -2.749
_refine_diff_density_rms                0.35
 
#----------------------------------------------------------------------------#
#                   ATOMIC TYPES, COORDINATES AND THERMAL PARAMETERS         #
#----------------------------------------------------------------------------#
 
loop_
    _atom_type_symbol
    _atom_type_description
    _atom_type_scat_dispersion_real
    _atom_type_scat_dispersion_imag
    _atom_type_scat_source
C C 0.0033 0.0016 'International Tables Vol C Tables 4.2.6.8 and 6.1.1.4'
H H 0 0 'International Tables Vol C Tables 4.2.6.8 and 6.1.1.4'
N N 0.0061 0.0033 'International Tables Vol C Tables 4.2.6.8 and 6.1.1.4'
Cl Cl 0.1484 0.1585 'International Tables Vol C Tables 4.2.6.8 and 6.1.1.4'
Ir Ir -1.4442 7.9887 'International Tables Vol C Tables 4.2.6.8 and 6.1.1.4'
 
loop_
    _atom_site_label
    _atom_site_type_symbol
    _atom_site_fract_x
    _atom_site_fract_y
    _atom_site_fract_z
    _atom_site_U_iso_or_equiv
    _atom_site_adp_type
    _atom_site_occupancy
    _atom_site_symmetry_multiplicity
    _atom_site_calc_flag
    _atom_site_refinement_flags
    _atom_site_disorder_assembly
    _atom_site_disorder_group
Ir1 Ir 0.38650(9) 0.25 0.32267(7) 0.0274(3) Uani 1 2 d S . .
Ir2 Ir 0.23429(10) 0.25 0.77657(7) 0.0334(3) Uani 1 2 d S . .
Cl1 Cl 0.2455(8) 0.25 0.1473(5) 0.060(2) Uani 1 2 d S . .
Cl21 Cl -0.0172(7) 0.25 0.6574(5) 0.0427(16) Uani 1 2 d S . .
Cl22 Cl 0.2915(5) 0.1292(3) 0.6729(3) 0.0392(10) Uani 1 1 d . . .
N11 N 0.1479(14) 0.3326(10) 0.3940(10) 0.029(3) Uani 1 1 d . . .
N12 N 0.2359(15) 0.3518(10) 0.3381(10) 0.033(3) Uani 1 1 d . . .
C13 C 0.196(2) 0.4362(13) 0.2960(15) 0.043(5) Uani 1 1 d . . .
C131 C 0.263(3) 0.485(2) 0.2266(17) 0.071(8) Uani 1 1 d . . .
H13A H 0.3466 0.4475 0.2224 0.106 Uiso 1 1 calc R . .
H13B H 0.2987 0.548 0.2536 0.106 Uiso 1 1 calc R . .
H13C H 0.189 0.4916 0.1588 0.106 Uiso 1 1 calc R . .
C14 C 0.080(2) 0.4709(14) 0.3247(14) 0.041(4) Uani 1 1 d . . .
H14 H 0.0301 0.5295 0.3045 0.05 Uiso 1 1 calc R . .
C15 C 0.0508(19) 0.4056(13) 0.3872(13) 0.036(4) Uani 1 1 d . . .
C151 C -0.0588(18) 0.4006(13) 0.4390(13) 0.035(4) Uani 1 1 d . . .
H15A H -0.1223 0.3452 0.4147 0.052 Uiso 1 1 calc R . .
H15B H -0.1195 0.4581 0.4243 0.052 Uiso 1 1 calc R . .
H15C H -0.0076 0.3953 0.5123 0.052 Uiso 1 1 calc R . .
C10 C 0.176(2) 0.25 0.4547(16) 0.023(5) Uani 1 2 d S . .
H101 H 0.1128 0.25 0.4973 0.028 Uiso 1 2 calc SR . .
H102 H 0.2805 0.25 0.5003 0.028 Uiso 1 2 calc SR . .
C101 C 0.576(3) 0.25 0.4597(17) 0.046(7) Uiso 1 2 d SD . .
C102 C 0.584(2) 0.3317(14) 0.4014(15) 0.045(5) Uiso 1 1 d . . .
C103 C 0.589(2) 0.2998(13) 0.3088(14) 0.041(4) Uiso 1 1 d . . .
C106 C 0.585(4) 0.25 0.5696(18) 0.093(13) Uiso 1 2 d SD . .
C107 C 0.581(4) 0.433(2) 0.437(2) 0.090(9) Uiso 1 1 d . . .
H10D H 0.672 0.4461 0.4934 0.136 Uiso 1 1 calc R . .
H10E H 0.4956 0.442 0.4584 0.136 Uiso 1 1 calc R . .
H10F H 0.5737 0.4763 0.3806 0.136 Uiso 1 1 calc R . .
C108 C 0.605(3) 0.3610(16) 0.2232(16) 0.056(5) Uiso 1 1 d . . .
H10G H 0.6226 0.4269 0.2461 0.084 Uiso 1 1 calc R . .
H10H H 0.5135 0.3574 0.1643 0.084 Uiso 1 1 calc R . .
H10I H 0.6878 0.3381 0.2045 0.084 Uiso 1 1 calc R . .
C201 C 0.164(3) 0.25 0.903(2) 0.055(8) Uiso 1 2 d SD . .
C202 C 0.251(2) 0.3321(14) 0.9092(15) 0.046(5) Uiso 1 1 d . . .
C203 C 0.397(2) 0.2991(14) 0.9140(14) 0.042(4) Uiso 1 1 d . . .
C206 C 0.004(3) 0.25 0.897(2) 0.058(8) Uiso 1 2 d SD . .
C207 C 0.207(3) 0.4321(17) 0.9122(18) 0.063(6) Uiso 1 1 d . . .
H20D H 0.1001 0.4384 0.8758 0.095 Uiso 1 1 calc R . .
H20E H 0.2605 0.4723 0.8798 0.095 Uiso 1 1 calc R . .
H20F H 0.2294 0.4519 0.9828 0.095 Uiso 1 1 calc R . .
C208 C 0.523(3) 0.3616(17) 0.9204(17) 0.060(6) Uiso 1 1 d . . .
H20G H 0.5783 0.3762 0.9916 0.089 Uiso 1 1 calc R . .
H20H H 0.4863 0.4204 0.8834 0.089 Uiso 1 1 calc R . .
H20I H 0.5886 0.3297 0.8904 0.089 Uiso 1 1 calc R . .
H10A H 0.689 0.25 0.614 0.089 Uiso 1 2 d SD . .
H10B H 0.536 0.19341 0.583 0.089 Uiso 1 1 d D . .
H20A H -0.061 0.25 0.826 0.089 Uiso 1 2 d SD . .
H20B H -0.016 0.19341 0.931 0.089 Uiso 1 1 d D . .
 
loop_
    _atom_site_aniso_label
    _atom_site_aniso_U_11
    _atom_site_aniso_U_22
    _atom_site_aniso_U_33
    _atom_site_aniso_U_23
    _atom_site_aniso_U_13
    _atom_site_aniso_U_12
Ir1 0.0158(5) 0.0356(6) 0.0312(6) 0 0.0087(4) 0
Ir2 0.0209(5) 0.0472(7) 0.0288(5) 0 0.0040(4) 0
Cl1 0.038(4) 0.112(7) 0.033(4) 0 0.015(3) 0
Cl21 0.019(3) 0.071(5) 0.031(3) 0 0.000(2) 0
Cl22 0.037(2) 0.033(2) 0.040(2) 0.0022(18) 0.0036(19) 0.0061(19)
N11 0.014(6) 0.039(8) 0.030(7) 0.011(6) 0.004(5) 0.004(6)
N12 0.024(7) 0.040(8) 0.038(8) -0.008(6) 0.015(6) -0.002(6)
C13 0.046(12) 0.035(10) 0.053(11) 0.006(9) 0.025(10) 0.011(9)
C131 0.083(18) 0.090(19) 0.058(14) 0.033(13) 0.048(14) 0.046(15)
C14 0.034(10) 0.043(11) 0.050(11) 0.019(9) 0.020(9) 0.014(9)
C15 0.026(9) 0.040(10) 0.040(10) 0.002(8) 0.010(8) 0.005(8)
C151 0.020(8) 0.045(11) 0.040(9) -0.006(8) 0.010(7) 0.010(8)
C10 0.018(11) 0.023(11) 0.028(12) 0 0.007(9) 0
 
 
#----------------------------------------------------------------------------#
#                   MOLECULAR GEOMETRY                                       #
#----------------------------------------------------------------------------#
 
_geom_special_details
;
 All esds (except the esd in the dihedral angle between two l.s. planes)
 are estimated using the full covariance matrix.  The cell esds are taken
 into account individually in the estimation of esds in distances, angles
 and torsion angles; correlations between esds in cell parameters are only
 used when they are defined by crystal symmetry.  An approximate (isotropic)
 treatment of cell esds is used for estimating esds involving l.s. planes.
;
loop_
    _geom_bond_atom_site_label_1
    _geom_bond_atom_site_label_2
    _geom_bond_distance
    _geom_bond_site_symmetry_2
    _geom_bond_publ_flag
Ir1 N12 2.107(14) 4_565 ?
Ir1 N12 2.107(14) . ?
Ir1 C103 2.148(19) . ?
Ir1 C103 2.148(19) 4_565 ?
Ir1 C101 2.15(3) . ?
Ir1 C102 2.17(2) . ?
Ir1 C102 2.17(2) 4_565 ?
Ir1 Cl1 2.370(7) . ?
Ir2 C201 2.11(3) . ?
Ir2 C203 2.144(19) . ?
Ir2 C203 2.144(19) 4_565 ?
Ir2 C202 2.15(2) . ?
Ir2 C202 2.15(2) 4_565 ?
Ir2 Cl22 2.427(4) . ?
Ir2 Cl22 2.427(4) 4_565 ?
Ir2 Cl21 2.427(6) . ?
N11 N12 1.366(18) . ?
N11 C15 1.37(2) . ?
N11 C10 1.417(17) . ?
N12 C13 1.33(2) . ?
C13 C14 1.40(2) . ?
C13 C131 1.52(3) . ?
C131 H13A 0.98 . ?
C131 H13B 0.98 . ?
C131 H13C 0.98 . ?
C14 C15 1.37(2) . ?
C14 H14 0.95 . ?
C15 C151 1.48(2) . ?
C151 H15A 0.98 . ?
C151 H15B 0.98 . ?
C151 H15C 0.98 . ?
C10 N11 1.417(17) 4_565 ?
C10 H101 0.99 . ?
C10 H102 0.99 . ?
C101 C102 1.43(2) . ?
C101 C102 1.43(2) 4_565 ?
C101 C106 1.52(3) . ?
C102 C103 1.40(3) . ?
C102 C107 1.52(3) . ?
C103 C103 1.41(4) 4_565 ?
C103 C108 1.53(3) . ?
C106 H10A 0.98 . ?
C106 H10B 0.98 . ?
C107 H10D 0.98 . ?
C107 H10E 0.98 . ?
C107 H10F 0.98 . ?
C108 H10G 0.98 . ?
C108 H10H 0.98 . ?
C108 H10I 0.98 . ?
C201 C202 1.42(2) . ?
C201 C202 1.42(2) 4_565 ?
C201 C206 1.52(4) . ?
C202 C203 1.46(3) . ?
C202 C207 1.48(3) . ?
C203 C203 1.39(4) 4_565 ?
C203 C208 1.48(3) . ?
C206 H20A 0.98 . ?
C206 H20B 0.98 . ?
C207 H20D 0.98 . ?
C207 H20E 0.98 . ?
C207 H20F 0.98 . ?
C208 H20G 0.98 . ?
C208 H20H 0.98 . ?
C208 H20I 0.98 . ?
 
loop_
    _geom_angle_atom_site_label_1
    _geom_angle_atom_site_label_2
    _geom_angle_atom_site_label_3
    _geom_angle
    _geom_angle_site_symmetry_1
    _geom_angle_site_symmetry_3
    _geom_angle_publ_flag
N12 Ir1 N12 86.2(8) 4_565 . ?
N12 Ir1 C103 156.0(6) 4_565 . ?
N12 Ir1 C103 117.7(6) . . ?
N12 Ir1 C103 117.7(6) 4_565 4_565 ?
N12 Ir1 C103 156.0(6) . 4_565 ?
C103 Ir1 C103 38.3(10) . 4_565 ?
N12 Ir1 C101 108.1(6) 4_565 . ?
N12 Ir1 C101 108.1(6) . . ?
C103 Ir1 C101 64.1(8) . . ?
C103 Ir1 C101 64.1(8) 4_565 . ?
N12 Ir1 C102 145.4(6) 4_565 . ?
N12 Ir1 C102 95.6(7) . . ?
C103 Ir1 C102 37.7(7) . . ?
C103 Ir1 C102 63.7(7) 4_565 . ?
C101 Ir1 C102 38.7(6) . . ?
N12 Ir1 C102 95.6(7) 4_565 4_565 ?
N12 Ir1 C102 145.4(6) . 4_565 ?
C103 Ir1 C102 63.7(7) . 4_565 ?
C103 Ir1 C102 37.7(7) 4_565 4_565 ?
C101 Ir1 C102 38.7(6) . 4_565 ?
C102 Ir1 C102 64.2(11) . 4_565 ?
N12 Ir1 Cl1 86.4(4) 4_565 . ?
N12 Ir1 Cl1 86.4(4) . . ?
C103 Ir1 Cl1 96.9(5) . . ?
C103 Ir1 Cl1 96.9(5) 4_565 . ?
C101 Ir1 Cl1 159.8(7) . . ?
C102 Ir1 Cl1 128.2(5) . . ?
C102 Ir1 Cl1 128.2(5) 4_565 . ?
C201 Ir2 C203 65.8(8) . . ?
C201 Ir2 C203 65.8(8) . 4_565 ?
C203 Ir2 C203 37.8(10) . 4_565 ?
C201 Ir2 C202 38.9(6) . . ?
C203 Ir2 C202 39.8(7) . . ?
C203 Ir2 C202 65.2(7) 4_565 . ?
C201 Ir2 C202 38.9(6) . 4_565 ?
C203 Ir2 C202 65.2(7) . 4_565 ?
C203 Ir2 C202 39.8(7) 4_565 4_565 ?
C202 Ir2 C202 65.3(11) . 4_565 ?
C201 Ir2 Cl22 135.28(11) . . ?
C203 Ir2 Cl22 121.4(5) . . ?
C203 Ir2 Cl22 93.7(5) 4_565 . ?
C202 Ir2 Cl22 158.9(6) . . ?
C202 Ir2 Cl22 100.0(5) 4_565 . ?
C201 Ir2 Cl22 135.28(11) . 4_565 ?
C203 Ir2 Cl22 93.7(5) . 4_565 ?
C203 Ir2 Cl22 121.4(5) 4_565 4_565 ?
C202 Ir2 Cl22 100.0(5) . 4_565 ?
C202 Ir2 Cl22 158.9(6) 4_565 4_565 ?
Cl22 Ir2 Cl22 89.4(2) . 4_565 ?
C201 Ir2 Cl21 92.6(7) . . ?
C203 Ir2 Cl21 150.6(5) . . ?
C203 Ir2 Cl21 150.6(5) 4_565 . ?
C202 Ir2 Cl21 111.0(6) . . ?
C202 Ir2 Cl21 111.0(6) 4_565 . ?
Cl22 Ir2 Cl21 87.99(15) . . ?
Cl22 Ir2 Cl21 87.99(15) 4_565 . ?
N12 N11 C15 110.7(13) . . ?
N12 N11 C10 118.7(14) . . ?
C15 N11 C10 130.2(15) . . ?
C13 N12 N11 106.8(14) . . ?
C13 N12 Ir1 132.4(12) . . ?
N11 N12 Ir1 120.6(11) . . ?
N12 C13 C14 109.1(16) . . ?
N12 C13 C131 124.8(17) . . ?
C14 C13 C131 126.1(17) . . ?
C13 C131 H13A 109.5 . . ?
C13 C131 H13B 109.5 . . ?
H13A C131 H13B 109.5 . . ?
C13 C131 H13C 109.5 . . ?
H13A C131 H13C 109.5 . . ?
H13B C131 H13C 109.5 . . ?
C15 C14 C13 107.9(16) . . ?
C15 C14 H14 126.1 . . ?
C13 C14 H14 126.1 . . ?
C14 C15 N11 105.5(15) . . ?
C14 C15 C151 133.4(17) . . ?
N11 C15 C151 121.1(16) . . ?
C15 C151 H15A 109.5 . . ?
C15 C151 H15B 109.5 . . ?
H15A C151 H15B 109.5 . . ?
C15 C151 H15C 109.5 . . ?
H15A C151 H15C 109.5 . . ?
H15B C151 H15C 109.5 . . ?
N11 C10 N11 111.1(18) . 4_565 ?
N11 C10 H101 109.4 . . ?
N11 C10 H101 109.4 4_565 . ?
N11 C10 H102 109.4 . . ?
N11 C10 H102 109.4 4_565 . ?
H101 C10 H102 108 . . ?
C102 C101 C102 107(2) . 4_565 ?
C102 C101 C106 125.9(11) . . ?
C102 C101 C106 125.9(11) 4_565 . ?
C102 C101 Ir1 71.5(13) . . ?
C102 C101 Ir1 71.5(13) 4_565 . ?
C106 C101 Ir1 130(2) . . ?
C103 C102 C101 107.5(17) . . ?
C103 C102 C107 128.2(19) . . ?
C101 C102 C107 124.4(19) . . ?
C103 C102 Ir1 70.2(11) . . ?
C101 C102 Ir1 69.8(13) . . ?
C107 C102 Ir1 123.9(18) . . ?
C102 C103 C103 108.8(11) . 4_565 ?
C102 C103 C108 126.6(18) . . ?
C103 C103 C108 124.5(11) 4_565 . ?
C102 C103 Ir1 72.1(12) . . ?
C103 C103 Ir1 70.9(5) 4_565 . ?
C108 C103 Ir1 126.4(14) . . ?
C101 C106 H10A 109.5 . . ?
C101 C106 H10B 109.5 . . ?
H10A C106 H10B 109.4 . . ?
C102 C107 H10D 109.5 . . ?
C102 C107 H10E 109.5 . . ?
H10D C107 H10E 109.5 . . ?
C102 C107 H10F 109.5 . . ?
H10D C107 H10F 109.5 . . ?
H10E C107 H10F 109.5 . . ?
C103 C108 H10G 109.5 . . ?
C103 C108 H10H 109.5 . . ?
H10G C108 H10H 109.5 . . ?
C103 C108 H10I 109.5 . . ?
H10G C108 H10I 109.5 . . ?
H10H C108 H10I 109.5 . . ?
C202 C201 C202 110(2) . 4_565 ?
C202 C201 C206 125.2(11) . . ?
C202 C201 C206 125.2(11) 4_565 . ?
C202 C201 Ir2 72.1(13) . . ?
C202 C201 Ir2 72.1(13) 4_565 . ?
C206 C201 Ir2 125(2) . . ?
C201 C202 C203 106.6(17) . . ?
C201 C202 C207 127.4(19) . . ?
C203 C202 C207 126.0(19) . . ?
C201 C202 Ir2 69.0(14) . . ?
C203 C202 Ir2 69.7(11) . . ?
C207 C202 Ir2 127.0(15) . . ?
C203 C203 C202 108.6(11) 4_565 . ?
C203 C203 C208 126.7(12) 4_565 . ?
C202 C203 C208 124.7(18) . . ?
C203 C203 Ir2 71.1(5) 4_565 . ?
C202 C203 Ir2 70.5(11) . . ?
C208 C203 Ir2 125.5(14) . . ?
C201 C206 H20A 109.5 . . ?
C201 C206 H20B 109.5 . . ?
H20A C206 H20B 109.4 . . ?
C202 C207 H20D 109.5 . . ?
C202 C207 H20E 109.5 . . ?
H20D C207 H20E 109.5 . . ?
C202 C207 H20F 109.5 . . ?
H20D C207 H20F 109.5 . . ?
H20E C207 H20F 109.5 . . ?
C203 C208 H20G 109.5 . . ?
C203 C208 H20H 109.5 . . ?
H20G C208 H20H 109.5 . . ?
C203 C208 H20I 109.5 . . ?
H20G C208 H20I 109.5 . . ?
H20H C208 H20I 109.5 . . ?
#===END 

              ########################################
              #                                      #
              #   CIF generated by the Xtal System   #
              #                                      #
              ########################################
 
data_global
 
_audit_creation_method                 Xtal3.6
_audit_creation_date                   06-09-07
_audit_update_record                   ?
 
#==============================================================================
#   (Publishing Staff Use Only)
 
_journal_date_recd_electronic          ?
_journal_date_to_coeditor              ?
_journal_date_from_coeditor            ?
_journal_date_accepted                 ?
_journal_date_printers_first           ?
_journal_date_printers_final           ?
_journal_date_proofs_out               ?
_journal_date_proofs_in                ?
_journal_coeditor_name                 ?
_journal_coeditor_code                 ?
_journal_coeditor_notes
; ?
;
_journal_techeditor_code               ?
_journal_techeditor_notes
; ?
;
_journal_coden_ASTM                    ?
_journal_name_full                     ?
_journal_year                          ?
_journal_volume                        ?
_journal_issue                         ?
_journal_page_first                    ?
_journal_page_last                     ?
_journal_suppl_publ_number             ?
_journal_suppl_publ_pages              ?
 
#=======================================================================
 
# 1. SUBMISSION DETAILS
#----------------------
 
_publ_contact_author_name
     'Skelton, B. W.'
_publ_contact_author_address
;
   Department of Chemistry
   University of Western Australia
   35 Stirling Highway
   Crawley
   Western Australia 6009
   Australia
;
_publ_contact_author_email            bws@crystal.uwa.edu.au
_publ_contact_author_fax               (+61)_08_6488_1118
_publ_contact_author_phone             (+61)_08_6488_7107
 

 
loop_
_publ_author_name
_publ_author_footnote
_publ_author_address
 
 
'Skelton, Brian W.' .
; Department of Chemistry,
University of Western Australia,
35 Stirling Highway,
Crawley,
WA 6009,
Australia.
;
 

 
_publ_section_references
;
 Sheldrick, G M. (1996). SADABS. Program for Empirical Absorption Correction
  of Area Detector Data.  University of Gottingen, Germany.
 
 Siemens (1995). SMART and SAINT. Area-Detector Control and Integration
 Software. Siemens Analytical X-ray Systems Inc., Madison, Wisconsin, USA.
 
 Hall, S.R., King, G.S.D., and Stewart., J.M. (1995).
 The Xtal 3.5 User's Manual.  University of Western Australia, Lamb: Perth.
;

 
 
#=======================================================================
#  Data block for single structure (one for each study in the paper)
#=======================================================================
 
 
data_cpir4
 
 
# 2. EXPERIMENTAL DATA
#---------------------
 
 
_chemical_formula_sum                 'C20 H27 Cl1 F3 Ir1 N4 O3 S1'
_chemical_formula_moiety           'C19 H27 Cl1 Ir1 N4, C F3 O3 S'
_chemical_formula_weight               688.19
_chemical_melting_point                ?
 
_symmetry_cell_setting                 monoclinic
_symmetry_space_group_name_H-M         C_1_2/c_1
_symmetry_space_group_name_Hall        -c_2yc
 
loop_
_symmetry_equiv_pos_as_xyz
  +x,+y,+z  -x,+y,1/2-z  -x,-y,-z  +x,-y,1/2+z  1/2+x,1/2+y,+z
  1/2-x,1/2+y,1/2-z  1/2-x,1/2-y,-z  1/2+x,1/2-y,1/2+z
 
_cell_length_a                         22.569(5)
_cell_length_b                         8.570(2)
_cell_length_c                         23.910(5)
_cell_angle_alpha                      90.00000
_cell_angle_beta                       91.232(4)
_cell_angle_gamma                      90.00000
_cell_volume                           4623.5(18)
_cell_formula_units_Z                  8
 
_exptl_crystal_density_diffrn          1.977
_exptl_crystal_density_meas            ?
_exptl_crystal_density_method          'not measured'
_diffrn_radiation_type                'Mo K\a'
_diffrn_radiation_wavelength           .71073
 
_cell_measurement_reflns_used          6142
_cell_measurement_theta_min            2.45
_cell_measurement_theta_max            27
_cell_measurement_temperature          150
 
_exptl_absorpt_coefficient_mu          6.036
_exptl_crystal_description             plate
_exptl_crystal_size_max                .08
_exptl_crystal_size_mid                .07
_exptl_crystal_size_min                .03
_exptl_crystal_size_rad                ?
_exptl_crystal_colour                  pale_yellow
 
_diffrn_measurement_device_type        
;
Bruker SMART CCD diffractometer
;
_diffrn_measurement_method             '\w scans'
_diffrn_detector_area_resol_mean       ?
 
_exptl_absorpt_correction_type         multi-scan
_exptl_absorpt_process_details
;
 SADABS; Sheldrick, 1996
;
_exptl_absorpt_correction_T_min        .58
_exptl_absorpt_correction_T_max        1
 
_diffrn_reflns_number                  21808
_reflns_number_total                   4690
_reflns_Friedel_coverage               ?
_reflns_number_gt                      3385
_reflns_threshold_expression          'I    >  2.00 sig(I   )'
 
_diffrn_reflns_theta_max               26.3
_diffrn_reflns_theta_full              26.3
_diffrn_measured_fraction_theta_max    1
_diffrn_measured_fraction_theta_full   1
_diffrn_reflns_av_R_equivalents        .064
_diffrn_reflns_limit_h_min             -28
_diffrn_reflns_limit_h_max             28
_diffrn_reflns_limit_k_min             -10
_diffrn_reflns_limit_k_max             10
_diffrn_reflns_limit_l_min             -29
_diffrn_reflns_limit_l_max             29
_diffrn_standards_number               0
_diffrn_standards_decay_%              0
 
_refine_ls_structure_factor_coef       Fsqd
_refine_ls_R_factor_gt                 .06
_refine_ls_wR_factor_ref               .093
_refine_ls_goodness_of_fit_ref         1.142
_refine_ls_number_reflns               4690
_refine_ls_number_parameters           298
_refine_ls_weighting_scheme            calc
_refine_ls_weighting_details           ?
_refine_ls_hydrogen_treatment          noref
_refine_ls_shift/su_max                .002
_refine_diff_density_min               -1.754
_refine_diff_density_max               1.926
 
_refine_ls_extinction_method           none  
_refine_ls_extinction_coef             ?     
 
 
# 3. Information for the "methods" section
#-----------------------------------------
 
_computing_data_collection             'Siemens SMART (Siemens, 1995)'
_computing_cell_refinement             'Siemens SAINT (Siemens, 1995)'
_computing_data_reduction              xtal
_computing_structure_solution          xtal
_computing_structure_refinement        xtal
_computing_molecular_graphics          xtal
_computing_publication_material       'xtal BONDLA CIFIO'
 
 
# 4. Supplementary data for validation and tables
#------------------------------------------------
 
loop_
_atom_type_symbol
_atom_type_description
_atom_type_oxidation_number
_atom_type_number_in_cell
_atom_type_scat_dispersion_real
_atom_type_scat_dispersion_imag
_atom_type_scat_source
  C  ?  0  160  .002014  .002014  'Int Tables Vol IV Tables 2.2B and 2.3.1'
  H  ?  0  216  0  0  'Int Tables Vol IV Tables 2.2B and 2.3.1'
  Cl  ?  0  8  .132019  .158997  'Int Tables Vol IV Tables 2.2B and 2.3.1'
  F  ?  0  24  .013977  .01001  'Int Tables Vol IV Tables 2.2B and 2.3.1'
  Ir  ?  0  8   -2.066   7.99  'Int Tables Vol IV Tables 2.2B and 2.3.1'
  N  ?  0  32  .004028  .002991  'Int Tables Vol IV Tables 2.2B and 2.3.1'
  O  ?  0  24  .007996  .005981  'Int Tables Vol IV Tables 2.2B and 2.3.1'
  S  ?  0  8  .109985  .124023  'Int Tables Vol IV Tables 2.2B and 2.3.1'
 
loop_
_atom_site_label
_atom_site_fract_x
_atom_site_fract_y
_atom_site_fract_z
_atom_site_U_iso_or_equiv
_atom_site_adp_type
_atom_site_calc_flag
_atom_site_calc_attached_atom
_atom_site_occupancy
_atom_site_disorder_assembly
_atom_site_disorder_group
  Ir  .149160(10)  .50632(3)  .620380(10)  .01473(13)  Uani  ?  ?  1.00000  ?  ?
  Cl  .19459(9)  .2585(2)  .64010(8)  .0265(9)  Uani  ?  ?  1.00000  ?  ?
  N11  .2016(3)  .4604(7)  .5035(2)  .019(3)  Uani  ?  ?  1.00000  ?  ?
  N12  .2105(3)  .5160(7)  .5566(3)  .022(3)  Uani  ?  ?  1.00000  ?  ?
  C13  .2687(3)  .5218(9)  .5644(3)  .022(4)  Uani  ?  ?  1.00000  ?  ?
  C14  .2981(3)  .4756(9)  .5169(3)  .025(4)  Uani  ?  ?  1.00000  ?  ?
  C15  .2544(4)  .4359(9)  .4788(3)  .027(4)  Uani  ?  ?  1.00000  ?  ?
  N21  .1044(3)  .3581(7)  .5081(3)  .019(3)  Uani  ?  ?  1.00000  ?  ?
  N22  .0962(3)  .3790(7)  .5644(2)  .023(3)  Uani  ?  ?  1.00000  ?  ?
  C23  .0552(3)  .2763(9)  .5782(3)  .023(4)  Uani  ?  ?  1.00000  ?  ?
  C24  .0349(3)  .1937(9)  .5328(3)  .025(4)  Uani  ?  ?  1.00000  ?  ?
  C25  .0669(3)  .2468(9)  .4895(3)  .021(4)  Uani  ?  ?  1.00000  ?  ?
  C0  .1418(3)  .4656(9)  .4764(3)  .021(4)  Uani  ?  ?  1.00000  ?  ?
  C01  .1173(3)  .6275(9)  .4776(3)  .024(4)  Uani  ?  ?  1.00000  ?  ?
  C02  .1462(4)  .4054(10)  .4163(3)  .032(4)  Uani  ?  ?  1.00000  ?  ?
  C101  .1108(4)  .7329(9)  .6374(3)  .026(4)  Uani  ?  ?  1.00000  ?  ?
  C1011  .0848(4)  .8586(11)  .6010(4)  .037(5)  Uani  ?  ?  1.00000  ?  ?
  C102  .0780(3)  .6133(9)  .6651(3)  .024(4)  Uani  ?  ?  1.00000  ?  ?
  C1021  .0138(5)  .5812(12)  .6559(5)  .049(6)  Uani  ?  ?  1.00000  ?  ?
  C103  .1178(4)  .5346(9)  .7040(3)  .029(4)  Uani  ?  ?  1.00000  ?  ?
  C1031  .1015(5)  .4075(11)  .7426(4)  .043(5)  Uani  ?  ?  1.00000  ?  ?
  C104  .1754(3)  .6056(9)  .6991(3)  .022(4)  Uani  ?  ?  1.00000  ?  ?
  C1041  .2270(4)  .5654(11)  .7341(3)  .037(5)  Uani  ?  ?  1.00000  ?  ?
  C105  .1701(3)  .7275(8)  .6592(3)  .020(3)  Uani  ?  ?  1.00000  ?  ?
  C1051  .2180(4)  .8349(9)  .6427(4)  .034(5)  Uani  ?  ?  1.00000  ?  ?
  S1  .41534(9)  .5874(3)  .65375(8)  .0288(10)  Uani  ?  ?  1.00000  ?  ?
  O11  .4665(3)  .6702(8)  .6734(3)  .041(4)  Uani  ?  ?  1.00000  ?  ?
  O12  .4256(3)  .4859(9)  .6067(3)  .051(4)  Uani  ?  ?  1.00000  ?  ?
  O13  .3626(3)  .6771(7)  .6496(2)  .035(3)  Uani  ?  ?  1.00000  ?  ?
  C1  .3999(4)  .4538(10)  .7095(4)  .038(5)  Uani  ?  ?  1.00000  ?  ?
  F11  .3544(3)  .3582(8)  .6950(3)  .072(5)  Uani  ?  ?  1.00000  ?  ?
  F12  .3847(3)  .5222(6)  .7562(2)  .044(3)  Uani  ?  ?  1.00000  ?  ?
  F13  .4448(3)  .3615(8)  .7227(3)  .074(5)  Uani  ?  ?  1.00000  ?  ?
  H13  .28845  .55332  .59878  .02600  Uiso  ?  ?  1.00000  ?  ?
  H14  .34076  .47124  .51202  .03200  Uiso  ?  ?  1.00000  ?  ?
  H15  .26064  .39968  .44155  .03300  Uiso  ?  ?  1.00000  ?  ?
  H23  .04126  .26066  .61565  .02700  Uiso  ?  ?  1.00000  ?  ?
  H24  .00503  .11434  .53173  .03100  Uiso  ?  ?  1.00000  ?  ?
  H25  .06382  .21103  .45141  .02700  Uiso  ?  ?  1.00000  ?  ?
  H01a  .11543  .66378  .51519  .03700  Uiso  ?  ?  1.00000  ?  ?
  H01b  .07847  .62867  .46119  .03700  Uiso  ?  ?  1.00000  ?  ?
  H01c  .14190  .69683  .45703  .03700  Uiso  ?  ?  1.00000  ?  ?
  H02a  .16179  .30243  .41616  .04700  Uiso  ?  ?  1.00000  ?  ?
  H02b  .17075  .47165  .39490  .04700  Uiso  ?  ?  1.00000  ?  ?
  H02c  .10732  .40349  .39907  .04700  Uiso  ?  ?  1.00000  ?  ?
  H1011a  .05533  .81026  .57779  .05500  Uiso  ?  ?  1.00000  ?  ?
  H1011b  .11630  .89387  .57809  .05500  Uiso  ?  ?  1.00000  ?  ?
  H1011c  .07061  .94316  .62287  .05500  Uiso  ?  ?  1.00000  ?  ?
  H1021a  .00516  .60402  .61754  .07500  Uiso  ?  ?  1.00000  ?  ?
  H1021b  -.00692  .65190  .67882  .07500  Uiso  ?  ?  1.00000  ?  ?
  H1021c  .00541  .47432  .66326  .07500  Uiso  ?  ?  1.00000  ?  ?
  H1031a  .07475  .44756  .76911  .06600  Uiso  ?  ?  1.00000  ?  ?
  H1031b  .13639  .37140  .76138  .06600  Uiso  ?  ?  1.00000  ?  ?
  H1031c  .08381  .32428  .72195  .06600  Uiso  ?  ?  1.00000  ?  ?
  H1041a  .26243  .59938  .71633  .05200  Uiso  ?  ?  1.00000  ?  ?
  H1041b  .22895  .45555  .73917  .05200  Uiso  ?  ?  1.00000  ?  ?
  H1041c  .22468  .61584  .76953  .05200  Uiso  ?  ?  1.00000  ?  ?
  H1051a  .24740  .83568  .67176  .05100  Uiso  ?  ?  1.00000  ?  ?
  H1051b  .20121  .93689  .63930  .05100  Uiso  ?  ?  1.00000  ?  ?
  H1051c  .23499  .80133  .60868  .05100  Uiso  ?  ?  1.00000  ?  ?
 
loop_
_atom_site_aniso_label
_atom_site_aniso_U_11
_atom_site_aniso_U_22
_atom_site_aniso_U_33
_atom_site_aniso_U_12
_atom_site_aniso_U_13
_atom_site_aniso_U_23
  Ir  .01825(14)  .01363(13)  .01238(13)  .00085(11)  .00186(9)  -.00040(11)
  Cl  .0392(11)  .0186(8)  .0217(9)  .0087(8)  .0032(8)  .0021(7)
  N11  .024(3)  .021(3)  .012(3)  -.000(2)  .003(2)  .001(2)
  N12  .025(3)  .020(3)  .020(3)  -.001(3)  .004(2)  -.004(3)
  C13  .013(3)  .029(4)  .023(4)  -.001(3)  .000(3)  -.001(3)
  C14  .025(4)  .028(4)  .023(4)  .002(3)  .008(3)  .002(3)
  C15  .029(4)  .026(4)  .025(4)  -.000(3)  .014(3)  .001(3)
  N21  .021(3)  .020(3)  .015(3)  .002(3)  .000(2)  -.001(2)
  N22  .042(4)  .022(3)  .005(3)  .004(3)  .004(2)  -.000(2)
  C23  .029(4)  .022(4)  .017(4)  -.006(3)  .003(3)  .001(3)
  C24  .029(4)  .022(4)  .023(4)  -.007(3)  .002(3)  -.005(3)
  C25  .017(3)  .023(4)  .024(4)  -.002(3)  -.006(3)  -.008(3)
  C0  .017(3)  .027(4)  .018(3)  .003(3)  .001(3)  .002(3)
  C01  .028(4)  .023(4)  .020(4)  .005(3)  -.004(3)  .004(3)
  C02  .049(5)  .027(4)  .020(4)  -.006(4)  .002(4)  -.002(3)
  C101  .032(4)  .017(4)  .029(4)  .007(3)  .003(3)  -.003(3)
  C1011  .047(5)  .033(5)  .032(5)  .016(4)  -.001(4)  -.000(4)
  C102  .027(4)  .016(3)  .029(4)  .005(3)  .006(3)  -.003(3)
  C1021  .045(6)  .033(5)  .071(7)  .000(4)  .021(5)  -.022(5)
  C103  .049(5)  .022(4)  .016(4)  .004(4)  .015(3)  .000(3)
  C1031  .065(7)  .036(5)  .031(5)  .001(5)  .027(5)  .003(4)
  C104  .034(4)  .019(3)  .013(3)  .003(3)  -.004(3)  .001(3)
  C1041  .054(6)  .036(5)  .020(4)  .012(4)  -.015(4)  -.002(4)
  C105  .037(4)  .016(3)  .007(3)  .010(3)  .001(3)  -.002(3)
  C1051  .042(5)  .018(4)  .043(5)  -.001(4)  .005(4)  -.001(4)
  S1  .0327(11)  .0328(11)  .0213(9)  -.0073(9)  .0056(8)  -.0089(8)
  O11  .026(3)  .054(4)  .043(4)  -.019(3)  .011(3)  -.013(3)
  O12  .068(5)  .052(4)  .035(4)  -.016(4)  .023(3)  -.024(3)
  O13  .039(3)  .038(3)  .028(3)  .002(3)  -.007(3)  .001(3)
  C1  .040(5)  .026(4)  .046(5)  .007(4)  .001(4)  .001(4)
  F11  .101(6)  .043(4)  .072(5)  -.038(4)  .024(4)  -.005(3)
  F12  .069(4)  .036(3)  .028(3)  .005(3)  .014(2)  .002(2)
  F13  .089(5)  .058(4)  .075(5)  .046(4)  .012(4)  .015(4)
 
 
# 5. Molecular Geometry
#----------------------
 
loop_
_geom_bond_atom_site_label_1
_geom_bond_atom_site_label_2
_geom_bond_site_symmetry_1
_geom_bond_site_symmetry_2
_geom_bond_distance
_geom_bond_publ_flag                 
  Ir  Cl  .  .  2.400(2)  ?
  Ir  N12  .  .  2.083(6)  ?
  Ir  N22  .  .  2.083(6)  ?
  Ir  C101  .  .  2.168(8)  ?
  Ir  C102  .  .  2.154(8)  ?
  Ir  C103  .  .  2.148(8)  ?
  Ir  C104  .  .  2.138(7)  ?
  Ir  C105  .  .  2.159(7)  ?
  N11  N12  .  .  1.367(8)  ?
  N11  C15  .  .  1.356(10)  ?
  N11  C0  .  .  1.486(9)  ?
  N12  C13  .  .  1.324(9)  ?
  C13  C14  .  .  1.384(11)  ?
  C13  H13  .  .  .966  ?
  C14  C15  .  .  1.372(11)  ?
  C14  H14  .  .  .973  ?
  C15  H15  .  .  .958  ?
  N21  N22  .  .  1.373(8)  ?
  N21  C25  .  .  1.345(9)  ?
  N21  C0  .  .  1.471(9)  ?
  N22  C23  .  .  1.325(10)  ?
  C23  C24  .  .  1.368(11)  ?
  C23  H23  .  .  .965  ?
  C24  C25  .  .  1.354(11)  ?
  C24  H24  .  .  .957  ?
  C25  H25  .  .  .961  ?
  C0  C01  .  .  1.495(11)  ?
  C0  C02  .  .  1.532(11)  ?
  C01  H01a  .  .  .953  ?
  C01  H01b  .  .  .951  ?
  C01  H01c  .  .  .957  ?
  C02  H02a  .  .  .951  ?
  C02  H02b  .  .  .951  ?
  C02  H02c  .  .  .961  ?
  C101  C1011  .  .  1.495(12)  ?
  C101  C102  .  .  1.435(11)  ?
  C101  C105  .  .  1.429(11)  ?
  C1011  H1011a  .  .  .952  ?
  C1011  H1011b  .  .  .955  ?
  C1011  H1011c  .  .  .954  ?
  C102  C1021  .  .  1.485(13)  ?
  C102  C103  .  .  1.447(11)  ?
  C1021  H1021a  .  .  .954  ?
  C1021  H1021b  .  .  .948  ?
  C1021  H1021c  .  .  .953  ?
  C103  C1031  .  .  1.479(12)  ?
  C103  C104  .  .  1.442(12)  ?
  C1031  H1031a  .  .  .950  ?
  C1031  H1031b  .  .  .950  ?
  C1031  H1031c  .  .  .950  ?
  C104  C1041  .  .  1.460(12)  ?
  C104  C105  .  .  1.419(10)  ?
  C1041  H1041a  .  .  .959  ?
  C1041  H1041b  .  .  .950  ?
  C1041  H1041c  .  .  .954  ?
  C105  C1051  .  .  1.479(12)  ?
  C1051  H1051a  .  .  .951 ?
  C1051  H1051b  .  .  .956  ?
  C1051  H1051c  .  .  .950  ?
  S1  O11  .  .  1.426(7)  ?
  S1  O12  .  .  1.444(7)  ?
  S1  O13  .  .  1.418(7)  ?
  S1  C1  .  .  1.796(10)  ?
  C1  F11  .  .  1.353(12)  ?
  C1  F12  .  .  1.314(11)  ?
  C1  F13  .  .  1.320(12)  ?
 
loop_
_geom_angle_atom_site_label_1
_geom_angle_atom_site_label_2
_geom_angle_atom_site_label_3
_geom_angle_site_symmetry_1
_geom_angle_site_symmetry_2
_geom_angle_site_symmetry_3
_geom_angle
_geom_angle_publ_flag                
  Cl  Ir  N12  .  .  .  83.77(18)  ?
  Cl  Ir  N22  .  .  .  84.24(18)  ?
  Cl  Ir  C101  .  .  .  157.8(2)  ?
  Cl  Ir  C102  .  .  .  126.8(2)  ?
  Cl  Ir  C103  .  .  .  93.7(2)  ?
  Cl  Ir  C104  .  .  .  94.0(2)  ?
  Cl  Ir  C105  .  .  .  127.1(2)  ?
  N12  Ir  N22  .  .  .  86.1(2)  ?
  N12  Ir  C101  .  .  .  112.1(3)  ?
  N12  Ir  C102  .  .  .  149.4(3)  ?
  N12  Ir  C103  .  .  .  156.1(3)  ?
  N12  Ir  C104  .  .  .  116.9(3)  ?
  N12  Ir  C105  .  .  .  97.9(3)  ?
  N22  Ir  C101  .  .  .  111.3(3)  ?
  N22  Ir  C102  .  .  .  96.8(3)  ?
  N22  Ir  C103  .  .  .  117.5(3)  ?
  N22  Ir  C104  .  .  .  156.7(3)  ?
  N22  Ir  C105  .  .  .  148.6(3)  ?
  C101  Ir  C102  .  .  .  38.8(3)  ?
  C101  Ir  C103  .  .  .  65.4(3)  ?
  C101  Ir  C104  .  .  .  65.4(3)  ?
  C101  Ir  C105  .  .  .  38.6(3)  ?
  C102  Ir  C103  .  .  .  39.3(3)  ?
  C102  Ir  C104  .  .  .  65.7(3)  ?
  C102  Ir  C105  .  .  .  64.6(3)  ?
  C103  Ir  C104  .  .  .  39.3(3)  ?
  C103  Ir  C105  .  .  .  64.8(3)  ?
  C104  Ir  C105  .  .  .  38.5(3)  ?
  N12  N11  C15  .  .  .  110.2(6)  ?
  N12  N11  C0  .  .  .  120.6(6)  ?
  C15  N11  C0  .  .  .  127.8(6)  ?
  Ir  N12  N11  .  .  .  125.4(5)  ?
  Ir  N12  C13  .  .  .  124.9(5)  ?
  N11  N12  C13  .  .  .  105.6(6)  ?
  N12  C13  C14  .  .  .  111.5(6)  ?
  N12  C13  H13  .  .  .  124.6  ?
  C14  C13  H13  .  .  .  123.9  ?
  C13  C14  C15  .  .  .  105.3(7)  ?
  C13  C14  H14  .  .  .  127.1  ?
  C15  C14  H14  .  .  .  127.6  ?
  N11  C15  C14  .  .  .  107.4(7)  ?
  N11  C15  H15  .  .  .  127.2  ?
  C14  C15  H15  .  .  .  125.4  ?
  N22  N21  C25  .  .  .  108.7(6)  ?
  N22  N21  C0  .  .  .  120.9(6)  ?
  C25  N21  C0  .  .  .  129.6(6)  ?
  Ir  N22  N21  .  .  .  127.7(5)  ?
  Ir  N22  C23  .  .  .  125.5(5)  ?
  N21  N22  C23  .  .  .  105.5(6)  ?
  N22  C23  C24  .  .  .  111.7(7)  ?
  N22  C23  H23  .  .  .  124.6  ?
  C24  C23  H23  .  .  .  123.7  ?
  C23  C24  C25  .  .  .  104.9(7)  ?
  C23  C24  H24  .  .  .  127.7  ?
  C25  C24  H24  .  .  .  127.3  ?
  N21  C25  C24  .  .  .  109.1(7)  ?
  N21  C25  H25  .  .  .  124.9  ?
  C24  C25  H25  .  .  .  126.0  ?
  N11  C0  N21  .  .  .  106.4(5)  ?
  N11  C0  C01  .  .  .  110.6(6)  ?
  N11  C0  C02  .  .  .  108.9(6)  ?
  N21  C0  C01  .  .  .  110.8(6)  ?
  N21  C0  C02  .  .  .  108.8(6)  ?
  C01  C0  C02  .  .  .  111.2(6)  ?
  C0  C01  H01a  .  .  .  110.1  ?
  C0  C01  H01b  .  .  .  109.9  ?
  C0  C01  H01c  .  .  .  110.3  ?
  H01a  C01  H01b  .  .  .  109.1  ?
  H01a  C01  H01c  .  .  .  108.6  ?
  H01b  C01  H01c  .  .  .  108.8  ?
  C0  C02  H02a  .  .  .  110.3  ?
  C0  C02  H02b  .  .  .  110.8  ?
  C0  C02  H02c  .  .  .  109.4  ?
  H02a  C02  H02b  .  .  .  109.4  ?
  H02a  C02  H02c  .  .  .  108.5  ?
  H02b  C02  H02c  .  .  .  108.5  ?
  Ir  C101  C1011  .  .  .  133.5(6)  ?
  Ir  C101  C102  .  .  .  70.1(4)  ?
  Ir  C101  C105  .  .  .  70.4(4)  ?
  C1011  C101  C102  .  .  .  125.7(7)  ?
  C1011  C101  C105  .  .  .  126.0(7)  ?
  C102  C101  C105  .  .  .  107.3(6)  ?
  C101  C1011  H1011a  .  .  .  106.6  ?
  C101  C1011  H1011b  .  .  .  106.0  ?
  C101  C1011  H1011c  .  .  .  111.1  ?
  H1011a  C1011  H1011b  .  .  .  108.8  ?
  H1011a  C1011  H1011c  .  .  .  114.2  ?
  H1011b  C1011  H1011c  .  .  .  109.7  ?
  Ir  C102  C101  .  .  .  71.2(4)  ?
  Ir  C102  C1021  .  .  .  125.6(6)  ?
  Ir  C102  C103  .  .  .  70.1(4)  ?
  C101  C102  C1021  .  .  .  125.1(7)  ?
  C101  C102  C103  .  .  .  108.1(7)  ?
  C1021  C102  C103  .  .  .  126.8(8)  ?
  C102  C1021  H1021a  .  .  .  106.5  ?
  C102  C1021  H1021b  .  .  .  106.7  ?
  C102  C1021  H1021c  .  .  .  110.4  ?
  H1021a  C1021  H1021b  .  .  .  109.3  ?
  H1021a  C1021  H1021c  .  .  .  109.7  ?
  H1021b  C1021  H1021c  .  .  .  113.9  ?
  Ir  C103  C102  .  .  .  70.6(4)  ?
  Ir  C103  C1031  .  .  .  126.1(6)  ?
  Ir  C103  C104  .  .  .  70.0(4)  ?
  C102  C103  C1031  .  .  .  125.8(8)  ?
  C102  C103  C104  .  .  .  107.5(7)  ?
  C1031  C103  C104  .  .  .  126.7(8)  ?
  C103  C1031  H1031a  .  .  .  108.7  ?
  C103  C1031  H1031b  .  .  .  108.7  ?
  C103  C1031  H1031c  .  .  .  109.7  ?
  H1031a  C1031  H1031b  .  .  .  109.5  ?
  H1031a  C1031  H1031c  .  .  .  110.6  ?
  H1031b  C1031  H1031c  .  .  .  109.7  ?
  Ir  C104  C103  .  .  .  70.7(4)  ?
  Ir  C104  C1041  .  .  .  127.8(6)  ?
  Ir  C104  C105  .  .  .  71.5(4)  ?
  C103  C104  C1041  .  .  .  124.3(7)  ?
  C103  C104  C105  .  .  .  107.6(7)  ?
  C1041  C104  C105  .  .  .  127.8(7)  ?
  C104  C1041  H1041a  .  .  .  109.8  ?
  C104  C1041  H1041b  .  .  .  110.0  ?
  C104  C1041  H1041c  .  .  .  110.1  ?
  H1041a  C1041  H1041b  .  .  .  108.7  ?
  H1041a  C1041  H1041c  .  .  .  108.5  ?
  H1041b  C1041  H1041c  .  .  .  109.8  ?
  Ir  C105  C101  .  .  .  71.1(4)  ?
  Ir  C105  C104  .  .  .  69.9(4)  ?
  Ir  C105  C1051  .  .  .  125.8(5)  ?
  C101  C105  C104  .  .  .  109.5(7)  ?
  C101  C105  C1051  .  .  .  124.5(7)  ?
  C104  C105  C1051  .  .  .  126.0(7)  ?
  C105  C1051  H1051a  .  .  .  108.1  ?
  C105  C1051  H1051b  .  .  .  107.5  ?
  C105  C1051  H1051c  .  .  .  110.6  ?
  H1051a  C1051  H1051b  .  .  .  108.9  ?
  H1051a  C1051  H1051c  .  .  .  109.8  ?
  H1051b  C1051  H1051c  .  .  .  111.8  ?
  O11  S1  O12  .  .  .  114.5(4)  ?
  O11  S1  O13  .  .  .  115.2(4)  ?
  O11  S1  C1  .  .  .  104.0(4)  ?
  O12  S1  O13  .  .  .  114.8(4)  ?
  O12  S1  C1  .  .  .  103.3(4)  ?
  O13  S1  C1  .  .  .  102.8(4)  ?
  S1  C1  F11  .  .  .  110.7(7)  ?
  S1  C1  F12  .  .  .  113.9(6)  ?
  S1  C1  F13  .  .  .  113.6(7)  ?
  F11  C1  F12  .  .  .  106.1(8)  ?
  F11  C1  F13  .  .  .  105.9(7)  ?
  F12  C1  F13  .  .  .  106.0(8)  ?
 

_exptl_crystal_F_000                   2688
 

 
_reflns_limit_h_min                    0
_reflns_limit_h_max                    28
_reflns_limit_k_min                    0
_reflns_limit_k_max                    10
_reflns_limit_l_min                    -29
_reflns_limit_l_max                    29
_reflns_number_observed                ?
_reflns_d_resolution_high              .8
_reflns_d_resolution_low               11.924
 
_diffrn_reflns_av_sigmaI/netI          .075
_diffrn_reflns_theta_min               1.7
_diffrn_reflns_reduction_process       ?
 
_diffrn_ambient_temperature            150(2)
_diffrn_radiation_source               'sealed tube'
_diffrn_radiation_monochromator        graphite
_diffrn_radiation_detector             'CCD area detector'
 
_refine_ls_extinction_expression       ?
_refine_ls_matrix_type                 full
_refine_ls_number_restraints           0
_refine_ls_number_constraints          0
_refine_ls_R_factor_all                .06
_refine_ls_wR_factor_all               .093
_refine_ls_goodness_of_fit_all         1.142
_refine_ls_shift/su_mean               .0002

#===END
              ########################################
              #                                      #
              #   CIF generated by the Xtal System   #
              #                                      #
              ########################################
 
data_global
 
_audit_creation_method                 Xtal3.6
_audit_creation_date                   06-09-07
_audit_update_record                   ?
 
#==============================================================================
#   (Publishing Staff Use Only)
 
_journal_date_recd_electronic          ?
_journal_date_to_coeditor              ?
_journal_date_from_coeditor            ?
_journal_date_accepted                 ?
_journal_date_printers_first           ?
_journal_date_printers_final           ?
_journal_date_proofs_out               ?
_journal_date_proofs_in                ?
_journal_coeditor_name                 ?
_journal_coeditor_code                 ?
_journal_coeditor_notes
; ?
;
_journal_techeditor_code               ?
_journal_techeditor_notes
; ?
;
_journal_coden_ASTM                    ?
_journal_name_full                     ?
_journal_year                          ?
_journal_volume                        ?
_journal_issue                         ?
_journal_page_first                    ?
_journal_page_last                     ?
_journal_suppl_publ_number             ?
_journal_suppl_publ_pages              ?
 
#=======================================================================
 
# 1. SUBMISSION DETAILS
#----------------------
 
_publ_contact_author_name
     'Skelton, B. W.'
_publ_contact_author_address
;
   Department of Chemistry
   University of Western Australia
   35 Stirling Highway
   Crawley
   Western Australia 6009
   Australia
;
_publ_contact_author_email            bws@crystal.uwa.edu.au
_publ_contact_author_fax               (+61)_08_6488_1118
_publ_contact_author_phone             (+61)_08_6488_7107
 

 
loop_
_publ_author_name
_publ_author_footnote
_publ_author_address
 
 
'Skelton, Brian W.' .
; Department of Chemistry,
University of Western Australia,
35 Stirling Highway,
Crawley,
WA 6009,
Australia.
;
 
 
 
_publ_section_acknowledgements
;    ?                                     #<< acknowledgements text
;
 
_publ_section_references
;
 Sheldrick, G M. (1996). SADABS. Program for Empirical Absorption Correction
  of Area Detector Data.  University of Gottingen, Germany.
 
 Siemens (1995). SMART and SAINT. Area-Detector Control and Integration
 Software. Siemens Analytical X-ray Systems Inc., Madison, Wisconsin, USA.
 
 Hall, S.R., King, G.S.D., and Stewart., J.M. (1995).
 The Xtal 3.5 User's Manual.  University of Western Australia, Lamb: Perth.
;

 
#=======================================================================
#  Data block for single structure (one for each study in the paper)
#=======================================================================
 
 
data_cprh01
 
 
# 2. EXPERIMENTAL DATA
#---------------------
 
 
 
_chemical_formula_sum                 'C21 H35 F6 N4 O10 Rh1 S2'
_chemical_formula_moiety        'C19 H29 N4 O Rh, 2(C F3 O3 S), 3(H2 O)'
_chemical_formula_weight               782.54
_chemical_melting_point                ?
 
_symmetry_cell_setting                 monoclinic
_symmetry_space_group_name_H-M         P_1_21/n_1
_symmetry_space_group_name_Hall        -p_2yn
 
loop_
_symmetry_equiv_pos_as_xyz
  +x,+y,+z  1/2-x,1/2+y,1/2-z  -x,-y,-z  1/2+x,1/2-y,1/2+z
 
_cell_length_a                         11.184(3)
_cell_length_b                         23.044(6)
_cell_length_c                         13.132(3)
_cell_angle_alpha                      90.00000
_cell_angle_beta                       113.902(4)
_cell_angle_gamma                      90.00000
_cell_volume                           3094.2(14)
_cell_formula_units_Z                  4
 
_exptl_crystal_density_diffrn          1.684
_exptl_crystal_density_meas            ?
_exptl_crystal_density_method          'not measured'
_diffrn_radiation_type                'Mo K\a'
_diffrn_radiation_wavelength           .71073
 
_cell_measurement_reflns_used          4551
_cell_measurement_theta_min            2.18
_cell_measurement_theta_max            27.71
_cell_measurement_temperature          150
 
_exptl_absorpt_coefficient_mu          .779
_exptl_crystal_description             prism
_exptl_crystal_size_max                .24
_exptl_crystal_size_mid                .13
_exptl_crystal_size_min                .12
_exptl_crystal_size_rad                ?
_exptl_crystal_colour                  orange
 
_diffrn_measurement_device_type        
;
Bruker SMART CCD diffractometer
;
_diffrn_measurement_method             '\w scans'
_diffrn_detector_area_resol_mean       ?
 
_exptl_absorpt_correction_type         multi-scan
_exptl_absorpt_process_details
;
 SADABS; Sheldrick, 1996
;
_exptl_absorpt_correction_T_min        .85
_exptl_absorpt_correction_T_max        1
 
_diffrn_reflns_number                  28712
_reflns_number_total                   7818
_reflns_Friedel_coverage               ?
_reflns_number_gt                     7818
_reflns_threshold_expression          'I   >  2.00 sig(I   )'
 
_diffrn_reflns_theta_max               29
_diffrn_reflns_theta_full              29
_diffrn_measured_fraction_theta_max    1
_diffrn_measured_fraction_theta_full   1
_diffrn_reflns_av_R_equivalents        .045
_diffrn_reflns_limit_h_min             -15
_diffrn_reflns_limit_h_max             13
_diffrn_reflns_limit_k_min             -30
_diffrn_reflns_limit_k_max             30
_diffrn_reflns_limit_l_min             -17
_diffrn_reflns_limit_l_max             17
_diffrn_standards_number               0
_diffrn_standards_decay_%              0
 
 
_refine_ls_structure_factor_coef       Fsqd
_refine_ls_R_factor_gt                 .043
_refine_ls_wR_factor_ref               .119
_refine_ls_goodness_of_fit_ref         1.09
_refine_ls_number_reflns               7818
_refine_ls_number_parameters           431
_refine_ls_weighting_scheme            calc
_refine_ls_weighting_details           
;
w=1/(sig^2(F^2) +  23F^2)
;
_refine_ls_hydrogen_treatment          noref
_refine_ls_shift/su_max                .002
_refine_diff_density_min               -.765
_refine_diff_density_max               1.042
 
_refine_ls_extinction_method           none 
_refine_ls_extinction_coef             ?     
 

 
 
# 3. Information for the "methods" section
#-----------------------------------------
 
_computing_data_collection             'Siemens SMART (Siemens, 1995)'
_computing_cell_refinement             'Siemens SAINT (Siemens, 1995)'
_computing_data_reduction              xtal
_computing_structure_solution          xtal
_computing_structure_refinement        xtal
_computing_molecular_graphics          xtal
_computing_publication_material       'xtal BONDLA CIFIO'
 
 
# 4. Supplementary data for validation and tables
#------------------------------------------------
 
loop_
_atom_type_symbol
_atom_type_description
_atom_type_oxidation_number
_atom_type_number_in_cell
_atom_type_scat_dispersion_real
_atom_type_scat_dispersion_imag
_atom_type_scat_source
  C  ?  0  84  .002014  .002014  'Int Tables Vol IV Tables 2.2B and 2.3.1'
  H  ?  0  140  0  0  'Int Tables Vol IV Tables 2.2B and 2.3.1'
  F  ?  0  24  .013977  .01001  'Int Tables Vol IV Tables 2.2B and 2.3.1'
  N  ?  0  16  .004028  .002991  'Int Tables Vol IV Tables 2.2B and 2.3.1'
  O  ?  0  40  .007996  .005981  'Int Tables Vol IV Tables 2.2B and 2.3.1'
  Rh  ?  0  4   -1.287  .919006  'Int Tables Vol IV Tables 2.2B and 2.3.1'
  S  ?  0  8  .109985  .124023  'Int Tables Vol IV Tables 2.2B and 2.3.1'
 
loop_
_atom_site_label
_atom_site_fract_x
_atom_site_fract_y
_atom_site_fract_z
_atom_site_U_iso_or_equiv
_atom_site_adp_type
_atom_site_calc_flag
_atom_site_calc_attached_atom
_atom_site_occupancy
_atom_site_disorder_assembly
_atom_site_disorder_group
  Rh  .56915(3)  .669110(10)  .43246(2)  .01785(12)  Uani  ?  ?  1.00000  ?  ?
  O1  .6619(3)  .73383(12)  .5606(2)  .0243(11)  Uani  ?  ?  1.00000  ?  ?
  N11  .8605(3)  .63945(13)  .4946(3)  .0217(13)  Uani  ?  ?  1.00000  ?  ?
  N12  .7561(3)  .67080(13)  .4276(3)  .0200(12)  Uani  ?  ?  1.00000  ?  ?
  C13  .8040(4)  .71598(16)  .3937(3)  .0230(15)  Uani  ?  ?  1.00000  ?  ?
  C14  .9397(4)  .71379(18)  .4362(3)  .0273(17)  Uani  ?  ?  1.00000  ?  ?
  C15  .9729(3)  .66442(17)  .4989(3)  .0235(15)  Uani  ?  ?  1.00000  ?  ?
  N21  .7748(3)  .58880(14)  .6089(3)  .0227(13)  Uani  ?  ?  1.00000  ?  ?
  N22  .6529(3)  .61243(13)  .5698(3)  .0211(13)  Uani  ?  ?  1.00000  ?  ?
  C23  .6120(4)  .60614(17)  .6522(3)  .0264(16)  Uani  ?  ?  1.00000  ?  ?
  C24  .7062(4)  .57784(18)  .7425(3)  .0265(16)  Uani  ?  ?  1.00000  ?  ?
  C25  .8079(4)  .56730(17)  .7117(3)  .0250(16)  Uani  ?  ?  1.00000  ?  ?
  C0  .8440(4)  .58141(16)  .5346(3)  .0235(15)  Uani  ?  ?  1.00000  ?  ?
  C01  .7645(4)  .54317(17)  .4361(3)  .0263(16)  Uani  ?  ?  1.00000  ?  ?
  C02  .9775(4)  .55567(18)  .6015(4)  .0299(18)  Uani  ?  ?  1.00000  ?  ?
  C101  .4343(4)  .62737(17)  .2842(3)  .0262(16)  Uani  ?  ?  1.00000  ?  ?
  C1011  .4501(5)  .5747(2)  .2249(4)  .036(2)  Uani  ?  ?  1.00000  ?  ?
  C102  .3787(3)  .62942(17)  .3652(3)  .0239(15)  Uani  ?  ?  1.00000  ?  ?
  C1021  .3370(5)  .57775(19)  .4110(4)  .0332(19)  Uani  ?  ?  1.00000  ?  ?
  C103  .3683(3)  .68847(17)  .3920(3)  .0235(15)  Uani  ?  ?  1.00000  ?  ?
  C1031  .3102(4)  .7110(2)  .4684(4)  .0324(19)  Uani  ?  ?  1.00000  ?  ?
  C104  .4137(4)  .72399(17)  .3231(3)  .0235(15)  Uani  ?  ?  1.00000  ?  ?
  C1041  .4122(4)  .78878(19)  .3206(4)  .0342(19)  Uani  ?  ?  1.00000  ?  ?
  C105  .4537(4)  .68660(18)  .2585(3)  .0255(16)  Uani  ?  ?  1.00000  ?  ?
  C1051  .5034(4)  .7040(2)  .1736(3)  .035(2)  Uani  ?  ?  1.00000  ?  ?
  S1  .32031(10)  .63214(4)  .75840(9)  .0268(4)  Uani  ?  ?  1.00000  ?  ?
  O11  .2816(3)  .60657(15)  .6499(3)  .0386(16)  Uani  ?  ?  1.00000  ?  ?
  O12  .4301(4)  .67050(15)  .7907(3)  .0481(18)  Uani  ?  ?  1.00000  ?  ?
  O13  .2129(3)  .65323(14)  .7828(3)  .0349(14)  Uani  ?  ?  1.00000  ?  ?
  C1  .3823(5)  .5715(2)  .8536(4)  .037(2)  Uani  ?  ?  1.00000  ?  ?
  F11  .4225(3)  .58785(17)  .9582(3)  .0619(18)  Uani  ?  ?  1.00000  ?  ?
  F12  .2910(4)  .53159(15)  .8341(3)  .072(2)  Uani  ?  ?  1.00000  ?  ?
  F13  .4832(3)  .54659(15)  .8417(3)  .0597(18)  Uani  ?  ?  1.00000  ?  ?
  S2  .97124(14)  .59049(6)  .20257(16)  .0296(7)  Uani  ?  ?  .789(4)  ?  ?
  O21  .9787(8)  .5359(3)  .1489(7)  .033(3)  Uani  ?  ?  .789(4)  ?  ?
  O22  1.0603(5)  .6346(2)  .1995(5)  .043(2)  Uani  ?  ?  .789(4)  ?  ?
  O23  .9640(6)  .5833(2)  .3077(4)  .053(3)  Uani  ?  ?  .789(4)  ?  ?
  C2  .8117(4)  .6191(2)  .1126(4)  .039(2)  Uani  ?  ?  1.00000  ?  ?
  F21  .7956(4)  .67257(17)  .1439(4)  .046(2)  Uani  ?  ?  .789(4)  ?  ?
  F22  .7182(4)  .5865(2)  .1133(6)  .086(3)  Uani  ?  ?  .789(4)  ?  ?
  F23  .8025(5)  .6247(2)  .0083(3)  .073(3)  Uani  ?  ?  .789(4)  ?  ?
  S2'  .9722(5)  .5955(2)  .1409(6)  .030(3)  Uani  ?  ?  .211(4)  ?  ?
  O21'  1.002(3)  .5398(16)  .175(3)  .041(9)  Uiso  ?  ?  .211(4)  ?  ?
  O22'  1.045(2)  .6337(9)  .2399(17)  .042(5)  Uiso  ?  ?  .211(4)  ?  ?
  O23'  .9790(17)  .6103(8)  .0379(14)  .047(4)  Uiso  ?  ?  .211(4)  ?  ?
  F21'  .771(2)  .6649(9)  .0868(17)  .058(5)  Uiso  ?  ?  .211(4)  ?  ?
  F22'  .7829(16)  .5994(7)  .2057(13)  .050(4)  Uiso  ?  ?  .211(4)  ?  ?
  F23'  .7266(16)  .5796(7)  .0357(13)  .049(4)  Uiso  ?  ?  .211(4)  ?  ?
  O2  .7017(3)  .83916(14)  .4978(3)  .0354(14)  Uani  ?  ?  1.00000  ?  ?
  O3  .5776(3)  .74683(13)  .7216(3)  .0326(14)  Uani  ?  ?  1.00000  ?  ?
  O4  .1368(6)  .5491(2)  .0237(5)  .082(3)  Uani  ?  ?  1.00000  ?  ?
  H13  .75190  .74775  .34832  .02600  Uiso  ?  ?  1.00000  ?  ?
  H14  .99624  .74018  .42282  .03000  Uiso  ?  ?  1.00000  ?  ?
  H15  1.05916  .64998  .53749  .02600  Uiso  ?  ?  1.00000  ?  ?
  H23  .53020  .61967  .65016  .02700  Uiso  ?  ?  1.00000  ?  ?
  H24  .69800  .56621  .80873  .02900  Uiso  ?  ?  1.00000  ?  ?
  H25  .88936  .55096  .75966  .02900  Uiso  ?  ?  1.00000  ?  ?
  H01a  .68201  .56018  .39730  .03900  Uiso  ?  ?  1.00000  ?  ?
  H01b  .75509  .50601  .46354  .03900  Uiso  ?  ?  1.00000  ?  ?
  H01c  .80997  .53952  .38935  .03900  Uiso  ?  ?  1.00000  ?  ?
  H02a  1.02562  .58115  .66185  .03900  Uiso  ?  ?  1.00000  ?  ?
  H02b  1.02510  .55247  .55478  .03900  Uiso  ?  ?  1.00000  ?  ?
  H02c  .97021  .51896  .62899  .03900  Uiso  ?  ?  1.00000  ?  ?
  H1011a  .38195  .57300  .15242  .05700  Uiso  ?  ?  1.00000  ?  ?
  H1011b  .44580  .54079  .26550  .05700  Uiso  ?  ?  1.00000  ?  ?
  H1011c  .53290  .57561  .22042  .05700  Uiso  ?  ?  1.00000  ?  ?
  H1021a  .24576  .57026  .36985  .05300  Uiso  ?  ?  1.00000  ?  ?
  H1021b  .35229  .58394  .48723  .05300  Uiso  ?  ?  1.00000  ?  ?
  H1021c  .38470  .54396  .40700  .05300  Uiso  ?  ?  1.00000  ?  ?
  H1031a  .35997  .74196  .51171  .04800  Uiso  ?  ?  1.00000  ?  ?
  H1031b  .30549  .68052  .51602  .04800  Uiso  ?  ?  1.00000  ?  ?
  H1031c  .22294  .72426  .42487  .04800  Uiso  ?  ?  1.00000  ?  ?
  H1041a  .33494  .80300  .26201  .05300  Uiso  ?  ?  1.00000  ?  ?
  H1041b  .48654  .80323  .30960  .05300  Uiso  ?  ?  1.00000  ?  ?
  H1041c  .41461  .80360  .38857  .05300  Uiso  ?  ?  1.00000  ?  ?
  H1051a  .57334  .67974  .17689  .05500  Uiso  ?  ?  1.00000  ?  ?
  H1051b  .53068  .74330  .18234  .05500  Uiso  ?  ?  1.00000  ?  ?
  H1051c  .43375  .70045  .10096  .05500  Uiso  ?  ?  1.00000  ?  ?
  H1a  .66202  .77076  .53296  .04700  Uiso  ?  ?  1.00000  ?  ?
  H1b  .64685  .73584  .62471  .04700  Uiso  ?  ?  1.00000  ?  ?
  H2a  .68737  .87705  .51280  .06600  Uiso  ?  ?  1.00000  ?  ?
  H2b  .71431  .83853  .43222  .06600  Uiso  ?  ?  1.00000  ?  ?
  H3a  .56255  .78612  .72633  .04900  Uiso  ?  ?  1.00000  ?  ?
  H3b  .51045  .73059  .73594  .04900  Uiso  ?  ?  1.00000  ?  ?
 
loop_
_atom_site_aniso_label
_atom_site_aniso_U_11
_atom_site_aniso_U_22
_atom_site_aniso_U_33
_atom_site_aniso_U_12
_atom_site_aniso_U_13
_atom_site_aniso_U_23
  Rh  .01743(13)  .01802(14)  .02012(14)  .00153(10)  .00969(11)  .00151(10)
  O1  .0260(13)  .0236(13)  .0232(13)  -.0006(11)  .0099(11)  -.0011(10)
  N11  .0230(15)  .0161(14)  .0307(16)  .0019(11)  .0157(13)  .0026(12)
  N12  .0177(14)  .0204(15)  .0247(15)  .0034(11)  .0114(12)  .0044(12)
  C13  .0290(19)  .0191(17)  .0251(18)  -.0015(14)  .0153(15)  -.0002(14)
  C14  .028(2)  .028(2)  .032(2)  -.0043(16)  .0192(17)  .0024(16)
  C15  .0168(16)  .028(2)  .0265(18)  -.0008(14)  .0098(14)  .0017(15)
  N21  .0271(16)  .0195(15)  .0245(15)  .0004(12)  .0135(13)  .0032(12)
  N22  .0176(14)  .0228(15)  .0252(15)  .0043(12)  .0109(12)  .0050(12)
  C23  .030(2)  .028(2)  .0274(19)  -.0018(16)  .0181(16)  -.0013(15)
  C24  .0256(19)  .028(2)  .0267(19)  -.0001(15)  .0118(16)  .0055(15)
  C25  .0260(19)  .0239(18)  .0239(18)  -.0008(14)  .0089(15)  .0033(14)
  C0  .0266(18)  .0196(17)  .0280(18)  .0042(14)  .0149(16)  .0010(14)
  C01  .029(2)  .0219(18)  .032(2)  -.0016(15)  .0174(17)  -.0019(15)
  C02  .0222(18)  .027(2)  .042(2)  .0063(15)  .0147(17)  .0067(17)
  C101  .030(2)  .026(2)  .0239(18)  .0018(16)  .0130(16)  .0007(15)
  C1011  .039(2)  .036(2)  .032(2)  .0031(19)  .0126(19)  -.0071(18)
  C102  .0167(16)  .0288(19)  .0227(17)  -.0014(14)  .0044(14)  .0019(15)
  C1021  .037(2)  .029(2)  .035(2)  -.0077(18)  .0162(19)  -.0003(17)
  C103  .0180(16)  .030(2)  .0224(17)  .0001(14)  .0080(14)  -.0000(14)
  C1031  .028(2)  .042(2)  .030(2)  .0087(18)  .0147(17)  -.0028(18)
  C104  .0190(17)  .0238(18)  .0222(17)  .0006(14)  .0029(14)  .0034(14)
  C1041  .029(2)  .027(2)  .040(2)  .0036(16)  .0064(18)  .0041(18)
  C105  .0227(18)  .028(2)  .0245(18)  -.0022(15)  .0079(15)  .0020(15)
  C1051  .034(2)  .048(3)  .0233(19)  -.003(2)  .0122(17)  .0097(18)
  S1  .0306(5)  .0242(5)  .0311(5)  -.0029(4)  .0181(4)  -.0029(4)
  O11  .0461(19)  .045(2)  .0297(16)  -.0017(15)  .0208(15)  -.0055(14)
  O12  .054(2)  .0371(19)  .067(2)  -.0210(16)  .039(2)  -.0155(17)
  O13  .0383(17)  .0358(17)  .0379(17)  .0061(13)  .0230(14)  -.0033(13)
  C1  .037(2)  .038(2)  .043(3)  .010(2)  .021(2)  .005(2)
  F11  .069(2)  .084(3)  .0328(15)  .035(2)  .0207(15)  .0083(16)
  F12  .080(3)  .044(2)  .101(3)  -.0078(18)  .047(2)  .024(2)
  F13  .063(2)  .059(2)  .070(2)  .0324(17)  .0406(18)  .0071(17)
  S2  .0345(7)  .0221(6)  .0346(10)  .0033(5)  .0165(6)  .0024(6)
  O21  .038(3)  .019(2)  .043(4)  .004(2)  .016(3)  -.005(2)
  O22  .039(3)  .031(2)  .063(3)  .0002(18)  .024(2)  -.000(2)
  O23  .085(4)  .045(3)  .037(2)  .016(3)  .034(3)  .010(2)
  C2  .026(2)  .038(3)  .050(3)  .0057(18)  .011(2)  .002(2)
  F21  .040(2)  .033(2)  .068(3)  .0157(16)  .026(2)  .004(2)
  F22  .031(2)  .056(3)  .159(7)  -.003(2)  .027(3)  .020(3)
  F23  .094(4)  .070(3)  .037(2)  .022(3)  .007(2)  .008(2)
  S2'  .026(2)  .032(3)  .033(4)  .0007(19)  .012(2)  .010(2)
  O2  .0368(17)  .0335(16)  .0398(17)  -.0055(13)  .0196(14)  .0013(13)
  O3  .0387(17)  .0292(15)  .0372(16)  -.0010(13)  .0231(14)  -.0003(12)
  O4  .103(4)  .069(3)  .099(4)  -.027(3)  .067(3)  -.022(3)
 
 
# 5. Molecular Geometry
#----------------------
 
loop_
_geom_bond_atom_site_label_1
_geom_bond_atom_site_label_2
_geom_bond_site_symmetry_1
_geom_bond_site_symmetry_2
_geom_bond_distance
_geom_bond_publ_flag                 
  Rh  O1  .  .  2.172(3)  ?
  Rh  N12  .  .  2.118(4)  ?
  Rh  N22  .  .  2.114(3)  ?
  Rh  C101  .  .  2.147(4)  ?
  Rh  C102  .  .  2.152(4)  ?
  Rh  C103  .  .  2.135(4)  ?
  Rh  C104  .  .  2.159(3)  ?
  Rh  C105  .  .  2.158(4)  ?
  O1  H1a  .  .  .926  ?
  O1  H1b  .  .  .924  ?
  N11  N12  .  .  1.352(4)  ?
  N11  C15  .  .  1.363(5)  ?
  N11  C0  .  .  1.475(5)  ?
  N12  C13  .  .  1.327(5)  ?
  C13  C14  .  .  1.390(6)  ?
  C13  H13  .  .  .974  ?
  C14  C15  .  .  1.365(6)  ?
  C14  H14  .  .  .944  ?
  C15  H15  .  .  .950  ?
  N21  N22  .  .  1.360(4)  ?
  N21  C25  .  .  1.341(5)  ?
  N21  C0  .  .  1.481(6)  ?
  N22  C23  .  .  1.343(6)  ?
  C23  C24  .  .  1.389(5)  ?
  C23  H23  .  .  .956  ?
  C24  C25  .  .  1.375(7)  ?
  C24  H24  .  .  .949  ?
  C25  H25  .  .  .951  ?
  C0  C01  .  .  1.519(5)  ?
  C0  C02  .  .  1.513(5)  ?
  C01  H01a  .  .  .940  ?
  C01  H01b  .  .  .951 ?
  C01  H01c  .  .  .946  ?
  C02  H02a  .  .  .958  ?
  C02  H02b  .  .  .964  ?
  C02  H02c  .  .  .936  ?
  C101  C1011  .  .  1.491(7)  ?
  C101  C102  .  .  1.435(7)  ?
  C101  C105  .  .  1.443(6)  ?
  C1011  H1011a  .  .  .949  ?
  C1011  H1011b  .  .  .958  ?
  C1011  H1011c  .  .  .951  ?
  C102  C1021  .  .  1.491(7)  ?
  C102  C103  .  .  1.422(6)  ?
  C1021  H1021a  .  .  .957  ?
  C1021  H1021b  .  .  .955  ?
  C1021  H1021c  .  .  .958  ?
  C103  C1031  .  .  1.492(7)  ?
  C103  C104  .  .  1.455(6)  ?
  C1031  H1031a  .  .  .942  ?
  C1031  H1031b  .  .  .955  ?
  C1031  H1031c  .  .  .960  ?
  C104  C1041  .  .  1.493(6)  ?
  C104  C105  .  .  1.404(6)  ?
  C1041  H1041a  .  .  .953  ?
  C1041  H1041b  .  .  .960  ?
  C1041  H1041c  .  .  .945  ?
  C105  C1051  .  .  1.489(7)  ?
  C1051  H1051a  .  .  .947  ?
  C1051  H1051b  .  .  .948  ?
  C1051  H1051c  .  .  .960  ?
  S1  O11  .  .  1.437(4)  ?
  S1  O12  .  .  1.431(4)  ?
  S1  O13  .  .  1.447(4)  ?
  S1  C1  .  .  1.815(5)  ?
  C1  F11  .  .  1.317(6)  ?
  C1  F12  .  .  1.319(6)  ?
  C1  F13  .  .  1.331(7)  ?
  S2  O21  .  .  1.460(8)  ?
  S2  O22  .  .  1.435(6)  ?
  S2  O23  .  .  1.424(6)  ?
  S2  C2  .  .  1.819(4)  ?
  C2  F21  .  .  1.333(7)  ?
  C2  F22  .  .  1.291(8)  ?
  C2  F23  .  .  1.337(8)  ?
  C2  S2'  .  .  1.765(7)  ?
  C2  F21'  .  .  1.14(2)  ?
  C2  F22'  .  .  1.46(2)  ?
  C2  F23'  .  .  1.405(15)  ?
  S2'  O21'  .  .  1.36(4)  ?
  S2'  O22'  .  .  1.51(2)  ?
  S2'  O23'  .  .  1.43(2)  ?
  O2  H2a  .  .  .923  ?
  O2  H2b  .  .  .928  ?
  O3  H3a  .  .  .928 ?
  O3  H3b  .  .  .924  ?
 
loop_
_geom_angle_atom_site_label_1
_geom_angle_atom_site_label_2
_geom_angle_atom_site_label_3
_geom_angle_site_symmetry_1
_geom_angle_site_symmetry_2
_geom_angle_site_symmetry_3
_geom_angle
_geom_angle_publ_flag                
  O1  Rh  N12  .  .  .  81.00(12)  ?
  O1  Rh  N22  .  .  .  81.69(11)  ?
  O1  Rh  C101  .  .  .  161.73(13)  ?
  O1  Rh  C102  .  .  .  133.80(15)  ?
  O1  Rh  C103  .  .  .  99.98(13)  ?
  O1  Rh  C104  .  .  .  96.67(12)  ?
  O1  Rh  C105  .  .  .  125.81(13)  ?
  N12  Rh  N22  .  .  .  86.31(13)  ?
  N12  Rh  C101  .  .  .  108.67(16)  ?
  N12  Rh  C102  .  .  .  145.17(15)  ?
  N12  Rh  C103  .  .  .  160.13(14)  ?
  N12  Rh  C104  .  .  .  120.53(15)  ?
  N12  Rh  C105  .  .  .  98.00(15)  ?
  N22  Rh  C101  .  .  .  113.74(13)  ?
  N22  Rh  C102  .  .  .  96.33(13)  ?
  N22  Rh  C103  .  .  .  113.53(15)  ?
  N22  Rh  C104  .  .  .  152.69(16)  ?
  N22  Rh  C105  .  .  .  152.49(14)  ?
  C101  Rh  C102  .  .  .  39.00(18)  ?
  C101  Rh  C103  .  .  .  65.57(17)  ?
  C101  Rh  C104  .  .  .  65.10(15)  ?
  C101  Rh  C105  .  .  .  39.17(15)  ?
  C102  Rh  C103  .  .  .  38.73(15)  ?
  C102  Rh  C104  .  .  .  65.13(15)  ?
  C102  Rh  C105  .  .  .  64.97(16)  ?
  C103  Rh  C104  .  .  .  39.61(17)  ?
  C103  Rh  C105  .  .  .  65.15(17)  ?
  C104  Rh  C105  .  .  .  37.95(17)  ?
  Rh  O1  H1a  .  .  .  113.8  ?
  Rh  O1  H1b  .  .  .  122.3  ?
  H1a  O1  H1b  .  .  .  110.0  ?
  N12  N11  C15  .  .  .  109.9(3)  ?
  N12  N11  C0  .  .  .  121.1(3)  ?
  C15  N11  C0  .  .  .  127.9(3)  ?
  Rh  N12  N11  .  .  .  125.0(3)  ?
  Rh  N12  C13  .  .  .  124.2(3)  ?
  N11  N12  C13  .  .  .  106.1(3)  ?
  N12  C13  C14  .  .  .  111.1(3)  ?
  N12  C13  H13  .  .  .  124.9  ?
  C14  C13  H13  .  .  .  123.9  ?
  C13  C14  C15  .  .  .  104.9(4)  ?
  C13  C14  H14  .  .  .  127.4  ?
  C15  C14  H14  .  .  .  127.7  ?
  N11  C15  C14  .  .  .  107.9(3)  ?
  N11  C15  H15  .  .  .  126.5  ?
  C14  C15  H15  .  .  .  125.6  ?
  N22  N21  C25  .  .  .  110.7(4)  ?
  N22  N21  C0  .  .  .  120.6(3)  ?
  C25  N21  C0  .  .  .  128.0(3)  ?
  Rh  N22  N21  .  .  .  126.8(3)  ?
  Rh  N22  C23  .  .  .  125.2(3)  ?
  N21  N22  C23  .  .  .  105.7(3)  ?
  N22  C23  C24  .  .  .  110.5(4)  ?
  N22  C23  H23  .  .  .  125.2  ?
  C24  C23  H23  .  .  .  124.3  ?
  C23  C24  C25  .  .  .  105.3(4)  ?
  C23  C24  H24  .  .  .  126.4  ?
  C25  C24  H24  .  .  .  128.2  ?
  N21  C25  C24  .  .  .  107.9(3)  ?
  N21  C25  H25  .  .  .  127.8  ?
  C24  C25  H25  .  .  .  124.0  ?
  N11  C0  N21  .  .  .  107.7(3)  ?
  N11  C0  C01  .  .  .  109.7(3)  ?
  N11  C0  C02  .  .  .  109.0(3)  ?
  N21  C0  C01  .  .  .  110.3(3)  ?
  N21  C0  C02  .  .  .  108.6(3)  ?
  C01  C0  C02  .  .  .  111.5(3)  ?
  C0  C01  H01a  .  .  .  109.1  ?
  C0  C01  H01b  .  .  .  108.4  ?
  C0  C01  H01c  .  .  .  108.7  ?
  H01a  C01  H01b  .  .  .  110.2  ?
  H01a  C01  H01c  .  .  .  110.7  ?
  H01b  C01  H01c  .  .  .  109.7  ?
  C0  C02  H02a  .  .  .  109.4  ?
  C0  C02  H02b  .  .  .  109.3  ?
  C0  C02  H02c  .  .  .  111.0  ?
  H02a  C02  H02b  .  .  .  107.7  ?
  H02a  C02  H02c  .  .  .  110.0  ?
  H02b  C02  H02c  .  .  .  109.5  ?
  Rh  C101  C1011  .  .  .  130.5(3)  ?
  Rh  C101  C102  .  .  .  70.7(2)  ?
  Rh  C101  C105  .  .  .  70.8(2)  ?
  C1011  C101  C102  .  .  .  126.4(4)  ?
  C1011  C101  C105  .  .  .  125.9(4)  ?
  C102  C101  C105  .  .  .  107.1(4)  ?
  C101  C1011  H1011a  .  .  .  109.9  ?
  C101  C1011  H1011b  .  .  .  109.3  ?
  C101  C1011  H1011c  .  .  .  109.8  ?
  H1011a  C1011  H1011b  .  .  .  108.8  ?
  H1011a  C1011  H1011c  .  .  .  110.2  ?
  H1011b  C1011  H1011c  .  .  .  108.8  ?
  Rh  C102  C101  .  .  .  70.3(2)  ?
  Rh  C102  C1021  .  .  .  126.4(2)  ?
  Rh  C102  C103  .  .  .  70.0(2)  ?
  C101  C102  C1021  .  .  .  125.0(4)  ?
  C101  C102  C103  .  .  .  108.5(4)  ?
  C1021  C102  C103  .  .  .  126.5(4)  ?
  C102  C1021  H1021a  .  .  .  110.6  ?
  C102  C1021  H1021b  .  .  .  110.5  ?
  C102  C1021  H1021c  .  .  .  110.7  ?
  H1021a  C1021  H1021b  .  .  .  108.5  ?
  H1021a  C1021  H1021c  .  .  .  108.2  ?
  H1021b  C1021  H1021c  .  .  .  108.2  ?
  Rh  C103  C102  .  .  .  71.3(2)  ?
  Rh  C103  C1031  .  .  .  127.3(2)  ?
  Rh  C103  C104  .  .  .  71.1(2)  ?
  C102  C103  C1031  .  .  .  126.9(4)  ?
  C102  C103  C104  .  .  .  107.5(4)  ?
  C1031  C103  C104  .  .  .  125.4(4)  ?
  C103  C1031  H1031a  .  .  .  111.0  ?
  C103  C1031  H1031b  .  .  .  109.9  ?
  C103  C1031  H1031c  .  .  .  109.0 ?
  H1031a  C1031  H1031b  .  .  .  109.7  ?
  H1031a  C1031  H1031c  .  .  .  109.1  ?
  H1031b  C1031  H1031c  .  .  .  108.1  ?
  Rh  C104  C103  .  .  .  69.3(2)  ?
  Rh  C104  C1041  .  .  .  126.8(2)  ?
  Rh  C104  C105  .  .  .  71.0(2)  ?
  C103  C104  C1041  .  .  .  124.9(4)  ?
  C103  C104  C105  .  .  .  107.9(4)  ?
  C1041  C104  C105  .  .  .  127.1(4)  ?
  C104  C1041  H1041a  .  .  .  111.1  ?
  C104  C1041  H1041b  .  .  .  110.3  ?
  C104  C1041  H1041c  .  .  .  110.2  ?
  H1041a  C1041  H1041b  .  .  .  108.4  ?
  H1041a  C1041  H1041c  .  .  .  107.9  ?
  H1041b  C1041  H1041c  .  .  .  108.8  ?
  Rh  C105  C101  .  .  .  70.0(2)  ?
  Rh  C105  C104  .  .  .  71.0(2)  ?
  Rh  C105  C1051  .  .  .  126.7(3)  ?
  C101  C105  C104  .  .  .  108.9(4)  ?
  C101  C105  C1051  .  .  .  124.5(4)  ?
  C104  C105  C1051  .  .  .  126.5(4)  ?
  C105  C1051  H1051a  .  .  .  111.0  ?
  C105  C1051  H1051b  .  .  .  111.4  ?
  C105  C1051  H1051c  .  .  .  108.8  ?
  H1051a  C1051  H1051b  .  .  .  109.9  ?
  H1051a  C1051  H1051c  .  .  .  108.6  ?
  H1051b  C1051  H1051c  .  .  .  107.1  ?
  O11  S1  O12  .  .  .  115.1(3)  ?
  O11  S1  O13  .  .  .  114.4(2)  ?
  O11  S1  C1  .  .  .  104.2(2)  ?
  O12  S1  O13  .  .  .  114.6(2)  ?
  O12  S1  C1  .  .  .  103.3(2)  ?
  O13  S1  C1  .  .  .  103.1(2)  ?
  S1  C1  F11  .  .  .  111.8(4)  ?
  S1  C1  F12  .  .  .  110.7(3)  ?
  S1  C1  F13  .  .  .  110.9(4)  ?
  F11  C1  F12  .  .  .  108.2(5)  ?
  F11  C1  F13  .  .  .  107.4(4)  ?
  F12  C1  F13  .  .  .  107.7(4)  ?
  O21  S2  O22  .  .  .  114.9(5)  ?
  O21  S2  O23  .  .  .  113.8(4)  ?
  O22  S2  O23  .  .  .  115.0(3)  ?
  O22  S2  C2  .  .  .  103.6(3)  ?
  O23  S2  C2  .  .  .  104.2(3)  ?
  S2  C2  F21  .  .  .  110.8(3)  ?
  S2  C2  F22  .  .  .  111.6(4)  ?
  S2  C2  F23  .  .  .  110.3(4)  ?
  F21  C2  F22  .  .  .  108.9(6)  ?
  F21  C2  F23  .  .  .  105.3(5)  ?
  S2'  C2  F21'  .  .  .  126.7(12)  ?
  S2'  C2  F22'  .  .  .  106.1(7)  ?
  S2'  C2  F23'  .  .  .  106.6(8)  ?
  F21'  C2  F22'  .  .  .  109.8(15)  ?
  F21'  C2  F23'  .  .  .  108.1(11)  ?
  F22'  C2  F23'  .  .  .  94.9(10)  ?
  C2  S2'  O21'  .  .  .  116.8(18)  ?
  C2  S2'  O22'  .  .  .  98.7(10)  ?
  C2  S2'  O23'  .  .  .  99.6(8)  ?
  O21'  S2'  O22'  .  .  .  106.9(15)  ?
  O21'  S2'  O23'  .  .  .  116(2)  ?
  O22'  S2'  O23'  .  .  .  117.4(12)  ?
  H2a  O2  H2b  .  .  .  108.5  ?
  H3a  O3  H3b  .  .  .  101.4  ?
 

_exptl_crystal_F_000                   1600
 

 
_reflns_limit_h_min                    0
_reflns_limit_h_max                    15
_reflns_limit_k_min                    0
_reflns_limit_k_max                    30
_reflns_limit_l_min                    -17
_reflns_limit_l_max                    16
_reflns_number_observed                ?
_reflns_d_resolution_high              .728
_reflns_d_resolution_low               11.496
 
_diffrn_reflns_av_sigmaI/netI          .064
_diffrn_reflns_theta_min               1.77
_diffrn_reflns_reduction_process       ?
 
_diffrn_ambient_temperature            150(2)
_diffrn_radiation_source               'sealed tube'
_diffrn_radiation_monochromator        graphite
_diffrn_radiation_detector             'CCD area detector'
 
_refine_ls_extinction_expression       ?
_refine_ls_matrix_type                 full
_refine_ls_number_restraints           0
_refine_ls_number_constraints          0
_refine_ls_R_factor_all                .063
_refine_ls_wR_factor_all               .119
_refine_ls_goodness_of_fit_all         1.09
_refine_ls_shift/su_mean               .0001
 
#===END 
data_global
 
_audit_creation_date                   06-05-06
_audit_update_record                   ?
 
#==============================================================================
#   (Publishing Staff Use Only)
 
_journal_date_recd_electronic          ?
_journal_date_to_coeditor              ?
_journal_date_from_coeditor            ?
_journal_date_accepted                 ?
_journal_date_printers_first           ?
_journal_date_printers_final           ?
_journal_date_proofs_out               ?
_journal_date_proofs_in                ?
_journal_coeditor_name                 ?
_journal_coeditor_code                 ?
_journal_coeditor_notes
; ?
;
_journal_techeditor_code               ?
_journal_techeditor_notes
; ?
;
_journal_coden_ASTM                    ?
_journal_name_full                     ?
_journal_year                          ?
_journal_volume                        ?
_journal_issue                         ?
_journal_page_first                    ?
_journal_page_last                     ?
_journal_suppl_publ_number             ?
_journal_suppl_publ_pages              ?
 
#=======================================================================
 
# 1. SUBMISSION DETAILS
#----------------------
 
_publ_contact_author_name
     'Skelton, B. W.'
_publ_contact_author_address
;
   Department of Chemistry
   University of Western Australia
   35 Stirling Highway
   Crawley
   Western Australia 6009
   Australia
;
_publ_contact_author_email            bws@crystal.uwa.edu.au
_publ_contact_author_fax               (+61)_08_6488_1118
_publ_contact_author_phone             (+61)_08_6488_7107
 
 
 
loop_
_publ_author_name
_publ_author_footnote
_publ_author_address
 
 
'Skelton, Brian W.' .
;  Chemistry,
University of Western Australia,
35 Stirling Highway,
Crawley,
WA 6009,
Australia.
;


 
data_cprhtf
 
_audit_creation_date                    2006-08-27T14:16:20-00:00
_audit_creation_method                  'WinGX routine CIF_UPDATE'
 
#----------------------------------------------------------------------------#
#                   CHEMICAL INFORMATION                                     #
#----------------------------------------------------------------------------#
 
_chemical_name_systematic
;
 ?
;
_chemical_formula_sum                   'C19 H25 F6 N4 O7 Rh S2'
_chemical_formula_moiety             'C17 H25 N4 O Rh, 2(C F3 O3 S)'
_chemical_formula_weight                702.46
_chemical_absolute_configuration        ad
 
#----------------------------------------------------------------------------#
#                   UNIT CELL INFORMATION                                    #
#----------------------------------------------------------------------------#
 
_symmetry_cell_setting                  monoclinic
_symmetry_space_group_name_H-M          'C 1 c 1'
_symmetry_space_group_name_Hall         c_-2yc
loop_
    _symmetry_equiv_pos_as_xyz
'x, y, z'
'x, -y, z+1/2'
'x+1/2, y+1/2, z'
'x+1/2, -y+1/2, z+1/2'
 
_cell_length_a                          18.292(3)
_cell_length_b                          10.2940(10)
_cell_length_c                          14.626(4)
_cell_angle_alpha                       90
_cell_angle_beta                        105.891(17)
_cell_angle_gamma                       90
_cell_volume                            2648.8(9)
_cell_formula_units_Z                   4
_cell_measurement_temperature           100(2)
_cell_measurement_reflns_used           27335
_cell_measurement_theta_min             2.5319
_cell_measurement_theta_max             38.0994
 
#----------------------------------------------------------------------------#
#                   CRYSTAL INFORMATION                                      #
#----------------------------------------------------------------------------#
 
_exptl_crystal_description              hexagonal_prism
_exptl_crystal_colour                   yellow
_exptl_crystal_size_max                 0.28
_exptl_crystal_size_mid                 0.26
_exptl_crystal_size_min                 0.19
_exptl_crystal_density_diffrn           1.761
_exptl_crystal_density_method           'not measured'
_exptl_crystal_F_000                    1416
_exptl_special_details
;
 ?
;
 
#----------------------------------------------------------------------------#
#                   ABSORPTION CORRECTION                                    #
#----------------------------------------------------------------------------#
 
_exptl_absorpt_coefficient_mu           0.891
_exptl_absorpt_correction_type          multi-scan
_exptl_absorpt_process_details
;
        CrysAlis RED, Oxford Diffraction Ltd.,
        Version 1.171.30.5 (release 12-06-2006 CrysAlis171 .NET)
        (compiled Jun 12 2006,17:01:16)
        Empirical absorption correction using spherical harmonics,
 implemented in SCALE3 ABSPACK scaling algorithm.
;
_exptl_absorpt_correction_T_min         0.93099
_exptl_absorpt_correction_T_max         1
 
#----------------------------------------------------------------------------#
#                   DATA COLLECTION                                          #
#----------------------------------------------------------------------------#
 
_diffrn_ambient_temperature             100(2)
_diffrn_radiation_wavelength            0.71073
_diffrn_radiation_type                  MoK\a
_diffrn_radiation_monochromator         graphite
_diffrn_detector_area_resol_mean        16.0009
_diffrn_orient_matrix_ub_11             -0.0377539961
_diffrn_orient_matrix_ub_12             -0.0205282127
_diffrn_orient_matrix_ub_13             -0.0220633673
_diffrn_orient_matrix_ub_21             0.0123962
_diffrn_orient_matrix_ub_22             -0.0655935546
_diffrn_orient_matrix_ub_23             0.0030067828
_diffrn_orient_matrix_ub_31             -0.0069783139
_diffrn_orient_matrix_ub_32             -0.0056516857
_diffrn_orient_matrix_ub_33             0.0451941197
_diffrn_reflns_av_R_equivalents         0.0301
_diffrn_reflns_av_unetI/netI            0.0442
_diffrn_reflns_number                   44821
_diffrn_reflns_limit_h_min              -31
_diffrn_reflns_limit_h_max              31
_diffrn_reflns_limit_k_min              -17
_diffrn_reflns_limit_k_max              17
_diffrn_reflns_limit_l_min              -25
_diffrn_reflns_limit_l_max              25
_diffrn_reflns_theta_min                2.54
_diffrn_reflns_theta_max                38.
_diffrn_reflns_theta_full               38.
_diffrn_measured_fraction_theta_full   0.99
_diffrn_measured_fraction_theta_max    0.99
_diffrn_measurement_device_type
;
 Oxford Diffraction Xcalibur diffractometer
;
_diffrn_measurement_method              '\w scans'


_reflns_number_total                    13535
_reflns_number_gt                       11410
_reflns_threshold_expression            I>2sigma(I)
 
#----------------------------------------------------------------------------#
#                   COMPUTER PROGRAMS USED                                   #
#----------------------------------------------------------------------------#
 
_computing_data_collection
;
        CrysAlis CCD, Oxford Diffraction Ltd.,
        Version 1.171.30.5 (release 12-06-2006 CrysAlis171 .NET)
        (compiled Jun 12 2006,17:01:16)
;
_computing_cell_refinement
;
        CrysAlis RED, Oxford Diffraction Ltd.,
        Version 1.171.30.5 (release 12-06-2006 CrysAlis171 .NET)
        (compiled Jun 12 2006,17:01:16)
;
_computing_data_reduction
;
        CrysAlis RED, Oxford Diffraction Ltd.,
        Version 1.171.30.5 (release 12-06-2006 CrysAlis171 .NET)
        (compiled Jun 12 2006,17:01:16)
;
_computing_structure_refinement         'SHELXL-97 (Sheldrick, 1997)'
 
#----------------------------------------------------------------------------#
#                   REFINEMENT INFORMATION                                   #
#----------------------------------------------------------------------------#
 
_refine_special_details
;
 Refinement of F^2^ against ALL reflections.  The weighted R-factor wR and
 goodness of fit S are based on F^2^, conventional R-factors R are based
 on F, with F set to zero for negative F^2^. The threshold expression of
 F^2^ > 2sigma(F^2^) is used only for calculating R-factors(gt) etc. and is
 not relevant to the choice of reflections for refinement.  R-factors based
 on F^2^ are statistically about twice as large as those based on F, and R-
 factors based on ALL data will be even larger.
;
_refine_ls_structure_factor_coef        Fsqd
_refine_ls_matrix_type                  full
_refine_ls_weighting_scheme             calc
_refine_ls_weighting_details
         'calc w=1/[\s^2^(Fo^2^)+(0.0314P)^2^] where P=(Fo^2^+2Fc^2^)/3'
_atom_sites_solution_primary            direct
_atom_sites_solution_secondary          difmap
_atom_sites_solution_hydrogens          geom
_refine_ls_hydrogen_treatment           constr
_refine_ls_extinction_method            none
_refine_ls_number_reflns                13535
_refine_ls_number_parameters            366
_refine_ls_number_restraints            0
_refine_ls_R_factor_all                 0.0337
_refine_ls_R_factor_gt                  0.0274
_refine_ls_wR_factor_ref                0.0598
_refine_ls_wR_factor_gt                 0.0579
_refine_ls_goodness_of_fit_ref          1.009
_refine_ls_restrained_S_all             1.009
_refine_ls_shift/su_max                 0.002
_refine_ls_shift/su_mean                0
_refine_ls_abs_structure_details
                                    'Flack H D (1983), Acta Cryst. A39, 876-881'
_refine_ls_abs_structure_Flack          0.00(4)
_refine_diff_density_max                2.909
_refine_diff_density_min                -0.753
_refine_diff_density_rms                0.09
 
#----------------------------------------------------------------------------#
#                   ATOMIC TYPES, COORDINATES AND THERMAL PARAMETERS         #
#----------------------------------------------------------------------------#
 
loop_
    _atom_type_symbol
    _atom_type_description
    _atom_type_scat_dispersion_real
    _atom_type_scat_dispersion_imag
    _atom_type_scat_source
C C 0.0033 0.0016 'International Tables Vol C Tables 4.2.6.8 and 6.1.1.4'
H H 0 0 'International Tables Vol C Tables 4.2.6.8 and 6.1.1.4'
N N 0.0061 0.0033 'International Tables Vol C Tables 4.2.6.8 and 6.1.1.4'
O O 0.0106 0.006 'International Tables Vol C Tables 4.2.6.8 and 6.1.1.4'
F F 0.0171 0.0103 'International Tables Vol C Tables 4.2.6.8 and 6.1.1.4'
S S 0.1246 0.1234 'International Tables Vol C Tables 4.2.6.8 and 6.1.1.4'
Rh Rh -1.1178 0.9187 'International Tables Vol C Tables 4.2.6.8 and 6.1.1.4'
 
loop_
    _atom_site_label
    _atom_site_type_symbol
    _atom_site_fract_x
    _atom_site_fract_y
    _atom_site_fract_z
    _atom_site_U_iso_or_equiv
    _atom_site_adp_type
    _atom_site_occupancy
    _atom_site_symmetry_multiplicity
    _atom_site_calc_flag
    _atom_site_refinement_flags
    _atom_site_disorder_assembly
    _atom_site_disorder_group
Rh1 Rh 0.500003(6) 0.467076(9) 0.500006(6) 0.01164(2) Uani 1 1 d . . .
O1 O 0.55008(7) 0.52136(11) 0.64844(8) 0.01479(19) Uani 1 1 d D . .
N11 N 0.37330(8) 0.31916(13) 0.55752(9) 0.0161(2) Uani 1 1 d . . .
N12 N 0.44801(8) 0.31749(13) 0.55909(9) 0.0154(2) Uani 1 1 d . . .
C13 C 0.47754(11) 0.21475(16) 0.61153(12) 0.0213(3) Uani 1 1 d . . .
H13 H 0.5293 0.1889 0.6255 0.026 Uiso 1 1 calc R . .
C14 C 0.42176(11) 0.15013(17) 0.64328(13) 0.0238(3) Uani 1 1 d . . .
H14 H 0.428 0.0742 0.6816 0.029 Uiso 1 1 calc R . .
C15 C 0.35654(10) 0.21927(17) 0.60754(12) 0.0209(3) Uani 1 1 d . . .
H15 H 0.3081 0.2003 0.6164 0.025 Uiso 1 1 calc R . .
N21 N 0.34697(7) 0.54396(13) 0.53028(10) 0.0158(2) Uani 1 1 d . . .
N22 N 0.41249(8) 0.59147(14) 0.51710(10) 0.0156(2) Uani 1 1 d . . .
C23 C 0.41787(10) 0.71466(16) 0.54858(12) 0.0188(3) Uani 1 1 d . . .
H23 H 0.4586 0.772 0.5487 0.023 Uiso 1 1 calc R . .
C24 C 0.35508(10) 0.74625(18) 0.58102(12) 0.0237(3) Uani 1 1 d . . .
H24 H 0.3447 0.8271 0.6062 0.028 Uiso 1 1 calc R . .
C25 C 0.31147(10) 0.6360(2) 0.56894(12) 0.0224(3) Uani 1 1 d . . .
H25 H 0.2648 0.6258 0.5848 0.027 Uiso 1 1 calc R . .
C10 C 0.32282(9) 0.41395(17) 0.49950(12) 0.0197(3) Uani 1 1 d . . .
H10A H 0.3226 0.4029 0.4322 0.024 Uiso 1 1 calc R . .
H10B H 0.2704 0.3998 0.5042 0.024 Uiso 1 1 calc R . .
C101 C 0.48127(9) 0.48629(16) 0.35056(10) 0.0158(3) Uani 1 1 d . . .
C102 C 0.53951(9) 0.57785(15) 0.39890(11) 0.0155(3) Uani 1 1 d . . .
C103 C 0.60212(9) 0.50502(16) 0.45590(11) 0.0148(3) Uani 1 1 d . . .
C104 C 0.58234(9) 0.36891(16) 0.44575(11) 0.0155(3) Uani 1 1 d . . .
C105 C 0.50869(9) 0.35773(15) 0.37833(10) 0.0155(3) Uani 1 1 d . . .
C106 C 0.40829(10) 0.52228(18) 0.28058(12) 0.0226(3) Uani 1 1 d . . .
H10C H 0.417 0.5359 0.2181 0.034 Uiso 1 1 calc R . .
H10D H 0.3886 0.6024 0.3012 0.034 Uiso 1 1 calc R . .
H10E H 0.3713 0.4522 0.2764 0.034 Uiso 1 1 calc R . .
C107 C 0.53744(12) 0.72205(16) 0.38532(12) 0.0229(3) Uani 1 1 d . . .
H10F H 0.5671 0.764 0.4439 0.034 Uiso 1 1 calc R . .
H10G H 0.4847 0.7524 0.3701 0.034 Uiso 1 1 calc R . .
H10H H 0.5592 0.7442 0.3331 0.034 Uiso 1 1 calc R . .
C108 C 0.67310(9) 0.56018(17) 0.51830(12) 0.0189(3) Uani 1 1 d . . .
H10I H 0.7063 0.5881 0.4795 0.028 Uiso 1 1 calc R . .
H10J H 0.6992 0.494 0.5638 0.028 Uiso 1 1 calc R . .
H10K H 0.6608 0.6349 0.5529 0.028 Uiso 1 1 calc R . .
C109 C 0.63295(10) 0.25848(16) 0.48941(12) 0.0209(3) Uani 1 1 d . . .
H10L H 0.6019 0.1821 0.4932 0.031 Uiso 1 1 calc R . .
H10M H 0.663 0.2828 0.5535 0.031 Uiso 1 1 calc R . .
H10N H 0.6672 0.2381 0.4502 0.031 Uiso 1 1 calc R . .
C100 C 0.46844(10) 0.23422(17) 0.34319(13) 0.0223(3) Uani 1 1 d . . .
H10O H 0.4135 0.2495 0.3242 0.033 Uiso 1 1 calc R . .
H10P H 0.481 0.1689 0.3939 0.033 Uiso 1 1 calc R . .
H10Q H 0.4844 0.203 0.2883 0.033 Uiso 1 1 calc R . .
S1 S 0.74524(2) 0.38771(4) 0.79288(3) 0.01733(7) Uani 1 1 d . . .
O11 O 0.66469(7) 0.40856(13) 0.77978(9) 0.0228(2) Uani 1 1 d . . .
O12 O 0.78144(8) 0.31167(13) 0.87548(9) 0.0260(3) Uani 1 1 d . . .
O13 O 0.76561(9) 0.35575(16) 0.70723(10) 0.0310(3) Uani 1 1 d . . .
C1 C 0.78604(11) 0.54849(19) 0.82270(13) 0.0254(3) Uani 1 1 d . . .
F11 F 0.75932(8) 0.63242(12) 0.75099(10) 0.0381(3) Uani 1 1 d . . .
F12 F 0.76880(9) 0.59795(13) 0.89837(10) 0.0419(3) Uani 1 1 d . . .
F13 F 0.86153(8) 0.54711(15) 0.84005(13) 0.0461(4) Uani 1 1 d . . .
S2 S 0.62861(3) 0.88945(4) 0.64482(3) 0.02077(8) Uani 1 1 d . . .
O21 O 0.69661(9) 0.87747(16) 0.61504(12) 0.0360(3) Uani 1 1 d . . .
O22 O 0.60205(9) 0.76935(13) 0.67540(12) 0.0324(3) Uani 1 1 d . . .
O23 O 0.56956(11) 0.96773(15) 0.58561(12) 0.0401(4) Uani 1 1 d . . .
C2 C 0.65881(14) 0.98007(19) 0.75574(15) 0.0322(4) Uani 1 1 d . . .
F21 F 0.60183(11) 0.99885(17) 0.79375(12) 0.0533(4) Uani 1 1 d . . .
F22 F 0.68448(13) 1.09724(15) 0.73901(13) 0.0691(6) Uani 1 1 d . . .
F23 F 0.71426(10) 0.92082(18) 0.81935(11) 0.0527(4) Uani 1 1 d . . .
H1A H 0.5668 0.6028 0.6507 0.036(7) Uiso 1 1 d D . .
H1B H 0.5890 0.4749 0.683 0.046(9) Uiso 1 1 d D . .
 
loop_
    _atom_site_aniso_label
    _atom_site_aniso_U_11
    _atom_site_aniso_U_22
    _atom_site_aniso_U_33
    _atom_site_aniso_U_23
    _atom_site_aniso_U_13
    _atom_site_aniso_U_12
Rh1 0.01044(4) 0.01307(4) 0.01181(4) 0.00001(5) 0.00371(3) 0.00058(5)
O1 0.0151(5) 0.0166(5) 0.0122(4) -0.0006(4) 0.0029(4) 0.0004(4)
N11 0.0129(6) 0.0198(6) 0.0152(5) 0.0000(5) 0.0032(4) -0.0052(5)
N12 0.0149(6) 0.0161(5) 0.0167(6) 0.0001(5) 0.0068(5) -0.0010(5)
C13 0.0239(8) 0.0172(7) 0.0229(7) 0.0022(6) 0.0067(6) 0.0013(6)
C14 0.0288(9) 0.0197(7) 0.0244(8) 0.0033(6) 0.0097(7) -0.0038(6)
C15 0.0214(8) 0.0222(7) 0.0201(7) 0.0012(6) 0.0074(6) -0.0093(6)
N21 0.0089(5) 0.0226(6) 0.0160(6) 0.0024(5) 0.0038(4) 0.0024(4)
N22 0.0110(5) 0.0197(6) 0.0165(5) 0.0012(5) 0.0042(4) 0.0030(4)
C23 0.0197(7) 0.0174(7) 0.0191(7) 0.0005(5) 0.0049(6) 0.0067(5)
C24 0.0236(8) 0.0251(8) 0.0227(7) -0.0002(6) 0.0069(6) 0.0120(6)
C25 0.0171(8) 0.0326(9) 0.0199(7) 0.0073(6) 0.0089(6) 0.0127(6)
C10 0.0125(7) 0.0268(8) 0.0181(7) 0.0003(6) 0.0014(5) -0.0040(6)
C101 0.0143(7) 0.0232(7) 0.0100(5) -0.0001(5) 0.0033(5) 0.0004(5)
C102 0.0162(7) 0.0186(6) 0.0139(6) 0.0014(5) 0.0079(5) 0.0003(5)
C103 0.0133(6) 0.0194(6) 0.0136(6) -0.0019(5) 0.0070(5) -0.0005(5)
C104 0.0105(6) 0.0210(7) 0.0156(6) -0.0013(5) 0.0047(5) 0.0024(5)
C105 0.0161(7) 0.0180(6) 0.0132(6) -0.0029(5) 0.0051(5) -0.0006(5)
C106 0.0175(7) 0.0321(9) 0.0149(6) 0.0010(6) -0.0011(5) 0.0036(6)
C107 0.0327(9) 0.0175(7) 0.0205(7) 0.0051(6) 0.0106(7) 0.0034(6)
C108 0.0133(7) 0.0266(8) 0.0170(7) -0.0047(6) 0.0044(5) -0.0051(5)
C109 0.0194(7) 0.0184(7) 0.0243(7) -0.0006(6) 0.0052(6) 0.0059(6)
C100 0.0197(8) 0.0217(7) 0.0252(8) -0.0072(6) 0.0058(6) -0.0043(6)
S1 0.01688(18) 0.02196(17) 0.01330(15) 0.00072(13) 0.00437(13) 0.00437(14)
O11 0.0164(5) 0.0292(6) 0.0217(5) 0.0035(5) 0.0035(4) 0.0028(5)
O12 0.0231(6) 0.0282(6) 0.0234(6) 0.0077(5) 0.0009(5) 0.0049(5)
O13 0.0340(8) 0.0423(8) 0.0205(6) -0.0042(6) 0.0139(6) 0.0078(6)
C1 0.0237(9) 0.0309(9) 0.0233(8) 0.0021(7) 0.0092(6) -0.0020(7)
F11 0.0481(8) 0.0287(6) 0.0397(7) 0.0138(5) 0.0160(6) 0.0006(5)
F12 0.0640(10) 0.0339(7) 0.0335(6) -0.0158(5) 0.0228(7) -0.0151(7)
F13 0.0234(7) 0.0533(9) 0.0592(10) 0.0089(7) 0.0073(6) -0.0095(6)
S2 0.02198(19) 0.01523(15) 0.02549(18) -0.00375(15) 0.00714(15) 0.00018(14)
O21 0.0341(8) 0.0386(8) 0.0421(9) -0.0047(7) 0.0219(7) -0.0028(7)
O22 0.0305(7) 0.0189(6) 0.0502(8) -0.0058(6) 0.0151(6) -0.0080(5)
O23 0.0418(10) 0.0358(8) 0.0365(8) 0.0018(7) 0.0004(7) 0.0140(7)
C2 0.0435(12) 0.0248(9) 0.0286(9) -0.0062(7) 0.0105(8) -0.0127(8)
F21 0.0685(12) 0.0532(8) 0.0485(9) -0.0197(7) 0.0331(9) 0.0012(8)
F22 0.1163(16) 0.0311(7) 0.0613(10) -0.0162(7) 0.0266(11) -0.0410(9)
F23 0.0488(9) 0.0685(10) 0.0311(7) -0.0027(7) -0.0054(6) -0.0086(8)
 
 
#----------------------------------------------------------------------------#
#                   MOLECULAR GEOMETRY                                       #
#----------------------------------------------------------------------------#
 
_geom_special_details
;
 All esds (except the esd in the dihedral angle between two l.s. planes)
 are estimated using the full covariance matrix.  The cell esds are taken
 into account individually in the estimation of esds in distances, angles
 and torsion angles; correlations between esds in cell parameters are only
 used when they are defined by crystal symmetry.  An approximate (isotropic)
 treatment of cell esds is used for estimating esds involving l.s. planes.
;
loop_
    _geom_bond_atom_site_label_1
    _geom_bond_atom_site_label_2
    _geom_bond_distance
    _geom_bond_site_symmetry_2
    _geom_bond_publ_flag
Rh1 N12 2.1148(13) . ?
Rh1 N22 2.1175(13) . ?
Rh1 C101 2.1270(16) . ?
Rh1 C104 2.1386(15) . ?
Rh1 C102 2.1435(15) . ?
Rh1 C105 2.1481(15) . ?
Rh1 C103 2.1720(16) . ?
Rh1 O1 2.1853(12) . ?
O1 H1A 0.890 . ?
O1 H1B 0.889 . ?
N11 C15 1.345(2) . ?
N11 N12 1.3607(19) . ?
N11 C10 1.448(2) . ?
N12 C13 1.331(2) . ?
C13 C14 1.400(2) . ?
C13 H13 0.95 . ?
C14 C15 1.364(3) . ?
C14 H14 0.95 . ?
C15 H15 0.95 . ?
N21 N22 1.3562(19) . ?
N21 C25 1.356(2) . ?
N21 C10 1.442(2) . ?
N22 C23 1.343(2) . ?
C23 C24 1.396(2) . ?
C23 H23 0.95 . ?
C24 C25 1.371(3) . ?
C24 H24 0.95 . ?
C25 H25 0.95 . ?
C10 H10A 0.99 . ?
C10 H10B 0.99 . ?
C101 C105 1.434(2) . ?
C101 C102 1.453(2) . ?
C101 C106 1.489(2) . ?
C102 C103 1.430(2) . ?
C102 C107 1.497(2) . ?
C103 C104 1.445(2) . ?
C103 C108 1.481(2) . ?
C104 C105 1.440(2) . ?
C104 C109 1.494(2) . ?
C105 C100 1.488(2) . ?
C106 H10C 0.98 . ?
C106 H10D 0.98 . ?
C106 H10E 0.98 . ?
C107 H10F 0.98 . ?
C107 H10G 0.98 . ?
C107 H10H 0.98 . ?
C108 H10I 0.98 . ?
C108 H10J 0.98 . ?
C108 H10K 0.98 . ?
C109 H10L 0.98 . ?
C109 H10M 0.98 . ?
C109 H10N 0.98 . ?
C100 H10O 0.98 . ?
C100 H10P 0.98 . ?
C100 H10Q 0.98 . ?
S1 O13 1.4394(13) . ?
S1 O12 1.4396(13) . ?
S1 O11 1.4488(14) . ?
S1 C1 1.819(2) . ?
C1 F12 1.332(2) . ?
C1 F13 1.334(3) . ?
C1 F11 1.343(2) . ?
S2 O21 1.4314(16) . ?
S2 O23 1.4330(16) . ?
S2 O22 1.4435(15) . ?
S2 C2 1.821(2) . ?
C2 F23 1.323(3) . ?
C2 F21 1.323(3) . ?
C2 F22 1.341(2) . ?
 
loop_
    _geom_angle_atom_site_label_1
    _geom_angle_atom_site_label_2
    _geom_angle_atom_site_label_3
    _geom_angle
    _geom_angle_site_symmetry_1
    _geom_angle_site_symmetry_3
    _geom_angle_publ_flag
N12 Rh1 N22 87.31(5) . . ?
N12 Rh1 C101 121.58(6) . . ?
N22 Rh1 C101 98.67(6) . . ?
N12 Rh1 C104 104.40(6) . . ?
N22 Rh1 C104 164.05(5) . . ?
C101 Rh1 C104 66.07(6) . . ?
N12 Rh1 C102 160.65(5) . . ?
N22 Rh1 C102 99.69(6) . . ?
C101 Rh1 C102 39.77(6) . . ?
C104 Rh1 C102 65.84(6) . . ?
N12 Rh1 C105 95.77(6) . . ?
N22 Rh1 C105 130.13(6) . . ?
C101 Rh1 C105 39.20(6) . . ?
C104 Rh1 C105 39.25(6) . . ?
C102 Rh1 C105 65.91(6) . . ?
N12 Rh1 C103 140.52(6) . . ?
N22 Rh1 C103 131.74(6) . . ?
C101 Rh1 C103 65.65(6) . . ?
C104 Rh1 C103 39.15(6) . . ?
C102 Rh1 C103 38.71(6) . . ?
C105 Rh1 C103 65.38(6) . . ?
N12 Rh1 O1 83.88(5) . . ?
N22 Rh1 O1 81.54(5) . . ?
C101 Rh1 O1 154.54(5) . . ?
C104 Rh1 O1 110.07(6) . . ?
C102 Rh1 O1 114.87(5) . . ?
C105 Rh1 O1 148.33(5) . . ?
C103 Rh1 O1 95.07(5) . . ?
Rh1 O1 H1A 108.9 . . ?
Rh1 O1 H1B 118 . . ?
H1A O1 H1B 105.8 . . ?
C15 N11 N12 111.02(14) . . ?
C15 N11 C10 129.07(14) . . ?
N12 N11 C10 119.66(13) . . ?
C13 N12 N11 105.48(13) . . ?
C13 N12 Rh1 131.08(12) . . ?
N11 N12 Rh1 123.09(10) . . ?
N12 C13 C14 110.56(16) . . ?
N12 C13 H13 124.7 . . ?
C14 C13 H13 124.7 . . ?
C15 C14 C13 105.39(15) . . ?
C15 C14 H14 127.3 . . ?
C13 C14 H14 127.3 . . ?
N11 C15 C14 107.55(15) . . ?
N11 C15 H15 126.2 . . ?
C14 C15 H15 126.2 . . ?
N22 N21 C25 110.49(15) . . ?
N22 N21 C10 119.82(13) . . ?
C25 N21 C10 129.60(15) . . ?
C23 N22 N21 106.04(13) . . ?
C23 N22 Rh1 128.65(12) . . ?
N21 N22 Rh1 121.65(10) . . ?
N22 C23 C24 110.28(16) . . ?
N22 C23 H23 124.9 . . ?
C24 C23 H23 124.9 . . ?
C25 C24 C23 105.49(15) . . ?
C25 C24 H24 127.3 . . ?
C23 C24 H24 127.3 . . ?
N21 C25 C24 107.69(15) . . ?
N21 C25 H25 126.2 . . ?
C24 C25 H25 126.2 . . ?
N21 C10 N11 110.54(13) . . ?
N21 C10 H10A 109.5 . . ?
N11 C10 H10A 109.5 . . ?
N21 C10 H10B 109.5 . . ?
N11 C10 H10B 109.5 . . ?
H10A C10 H10B 108.1 . . ?
C105 C101 C102 107.93(14) . . ?
C105 C101 C106 127.03(15) . . ?
C102 C101 C106 124.95(15) . . ?
C105 C101 Rh1 71.20(8) . . ?
C102 C101 Rh1 70.72(8) . . ?
C106 C101 Rh1 126.24(12) . . ?
C103 C102 C101 107.88(14) . . ?
C103 C102 C107 125.75(15) . . ?
C101 C102 C107 126.18(15) . . ?
C103 C102 Rh1 71.72(9) . . ?
C101 C102 Rh1 69.50(8) . . ?
C107 C102 Rh1 128.18(11) . . ?
C102 C103 C104 108.09(14) . . ?
C102 C103 C108 125.83(15) . . ?
C104 C103 C108 126.01(15) . . ?
C102 C103 Rh1 69.57(9) . . ?
C104 C103 Rh1 69.18(9) . . ?
C108 C103 Rh1 124.49(11) . . ?
C105 C104 C103 107.99(14) . . ?
C105 C104 C109 125.86(15) . . ?
C103 C104 C109 125.84(15) . . ?
C105 C104 Rh1 70.73(9) . . ?
C103 C104 Rh1 71.67(9) . . ?
C109 C104 Rh1 128.15(11) . . ?
C101 C105 C104 108.02(14) . . ?
C101 C105 C100 126.08(15) . . ?
C104 C105 C100 125.90(15) . . ?
C101 C105 Rh1 69.61(8) . . ?
C104 C105 Rh1 70.02(9) . . ?
C100 C105 Rh1 126.29(11) . . ?
C101 C106 H10C 109.5 . . ?
C101 C106 H10D 109.5 . . ?
H10C C106 H10D 109.5 . . ?
C101 C106 H10E 109.5 . . ?
H10C C106 H10E 109.5 . . ?
H10D C106 H10E 109.5 . . ?
C102 C107 H10F 109.5 . . ?
C102 C107 H10G 109.5 . . ?
H10F C107 H10G 109.5 . . ?
C102 C107 H10H 109.5 . . ?
H10F C107 H10H 109.5 . . ?
H10G C107 H10H 109.5 . . ?
C103 C108 H10I 109.5 . . ?
C103 C108 H10J 109.5 . . ?
H10I C108 H10J 109.5 . . ?
C103 C108 H10K 109.5 . . ?
H10I C108 H10K 109.5 . . ?
H10J C108 H10K 109.5 . . ?
C104 C109 H10L 109.5 . . ?
C104 C109 H10M 109.5 . . ?
H10L C109 H10M 109.5 . . ?
C104 C109 H10N 109.5 . . ?
H10L C109 H10N 109.5 . . ?
H10M C109 H10N 109.5 . . ?
C105 C100 H10O 109.5 . . ?
C105 C100 H10P 109.5 . . ?
H10O C100 H10P 109.5 . . ?
C105 C100 H10Q 109.5 . . ?
H10O C100 H10Q 109.5 . . ?
H10P C100 H10Q 109.5 . . ?
O13 S1 O12 115.90(9) . . ?
O13 S1 O11 114.52(9) . . ?
O12 S1 O11 114.14(8) . . ?
O13 S1 C1 103.28(9) . . ?
O12 S1 C1 103.25(9) . . ?
O11 S1 C1 103.45(9) . . ?
F12 C1 F13 108.32(18) . . ?
F12 C1 F11 106.53(17) . . ?
F13 C1 F11 106.96(16) . . ?
F12 C1 S1 111.84(13) . . ?
F13 C1 S1 111.80(14) . . ?
F11 C1 S1 111.12(14) . . ?
O21 S2 O23 116.01(11) . . ?
O21 S2 O22 114.50(9) . . ?
O23 S2 O22 114.01(11) . . ?
O21 S2 C2 103.79(11) . . ?
O23 S2 C2 104.17(11) . . ?
O22 S2 C2 102.03(9) . . ?
F23 C2 F21 108.21(19) . . ?
F23 C2 F22 107.7(2) . . ?
F21 C2 F22 107.5(2) . . ?
F23 C2 S2 112.18(16) . . ?
F21 C2 S2 111.57(16) . . ?
F22 C2 S2 109.52(15) . . ?
#===END 
